# Supplementary material for: A Bayesian Approach for Analysis of Whole-Genome Bisulfite Sequencing Data Identifies Disease-Associated Changes in DNA Methylation
Source: PubMed Central journal article supplement (PMC5378105; doi:10.1534/genetics.116.195008), 2017-02-16

**Supplementary Figure 3.** Size distribution of simulated DMRs used in the benchmarking experiments. Median size is 15 CpGs while average size is 24 CpGs with standard deviation 24 CpGs.

### Size distribution of DMRs

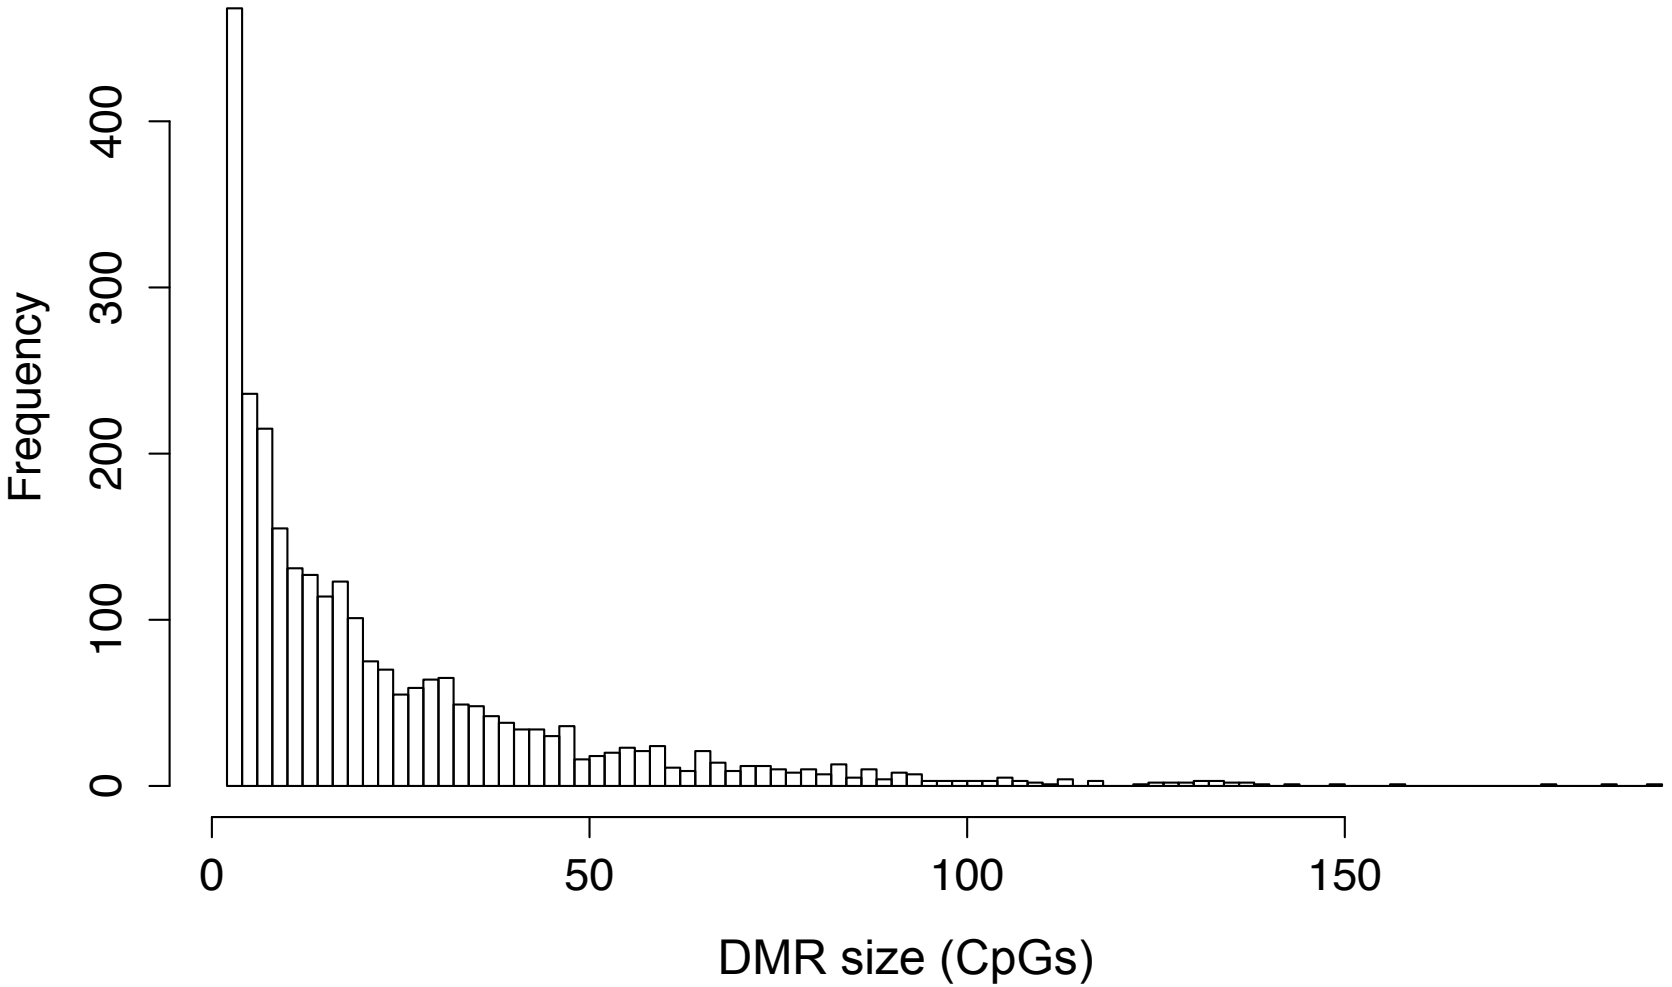

Supplement: 1443FigureS3.pdf [file 1443FigureS3.pdf]
