# Supplementary material for: A Bayesian Approach for Analysis of Whole-Genome Bisulfite Sequencing Data Identifies Disease-Associated Changes in DNA Methylation
Source: PubMed Central journal article supplement (PMC5378105; doi:10.1534/genetics.116.195008), 2017-02-16

**Supplementary Figure 4.** Histograms of  $d_i$ 's and the posterior mean differential methylation between two groups (see Methods), obtained by ABBA using data from  $d_i$ 's from a contiguous 45,300 CpG stretch of the genome (red) and the corresponding  $d_i$ 's which were obtained by ABBA using the same stretch broken down into smaller chunks (blue).

### Whole data vs chunked data analysis

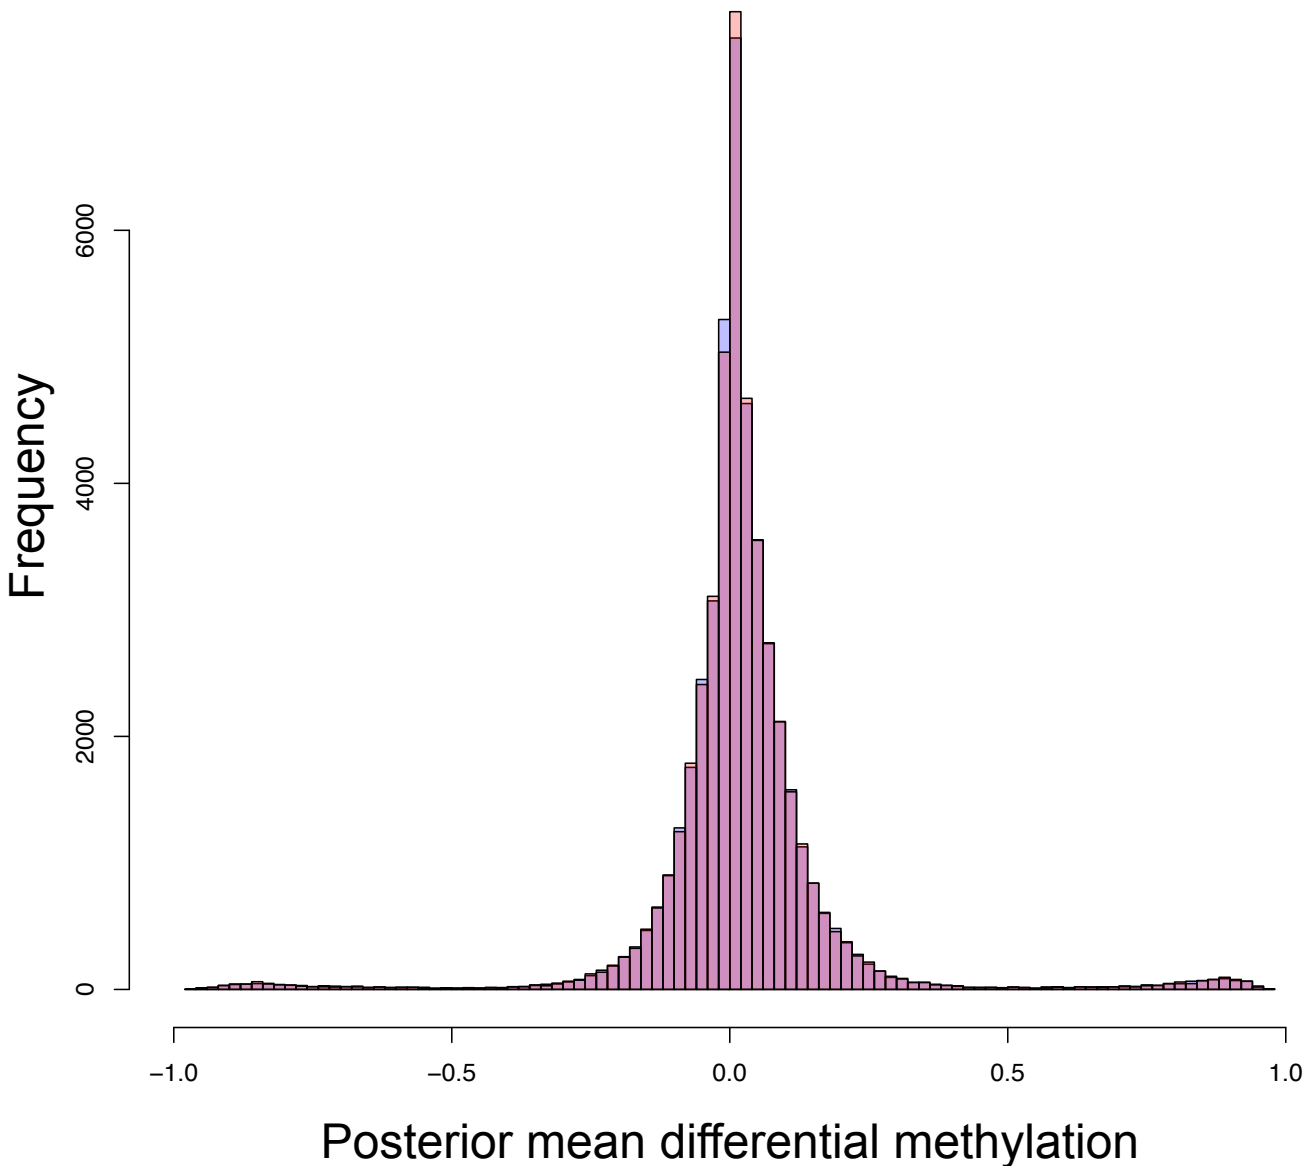

Supplement: 1443FigureS4.pdf [file 1443FigureS4.pdf]
