# Supplementary material for: A Bayesian Approach for Analysis of Whole-Genome Bisulfite Sequencing Data Identifies Disease-Associated Changes in DNA Methylation
Source: PubMed Central journal article supplement (PMC5378105; doi:10.1534/genetics.116.195008), 2017-02-16

**Supplementary Figure 7a:** ROC curves showing the performance of published techniques and ABBA over various experimentally relevant parameter settings, for a description of parameters see Methods. Parameters:  $s_0=0.1$ ,  $\delta = 10\%$ , and rows 1-3 refer to  $r=1$  to  $r=3$ .

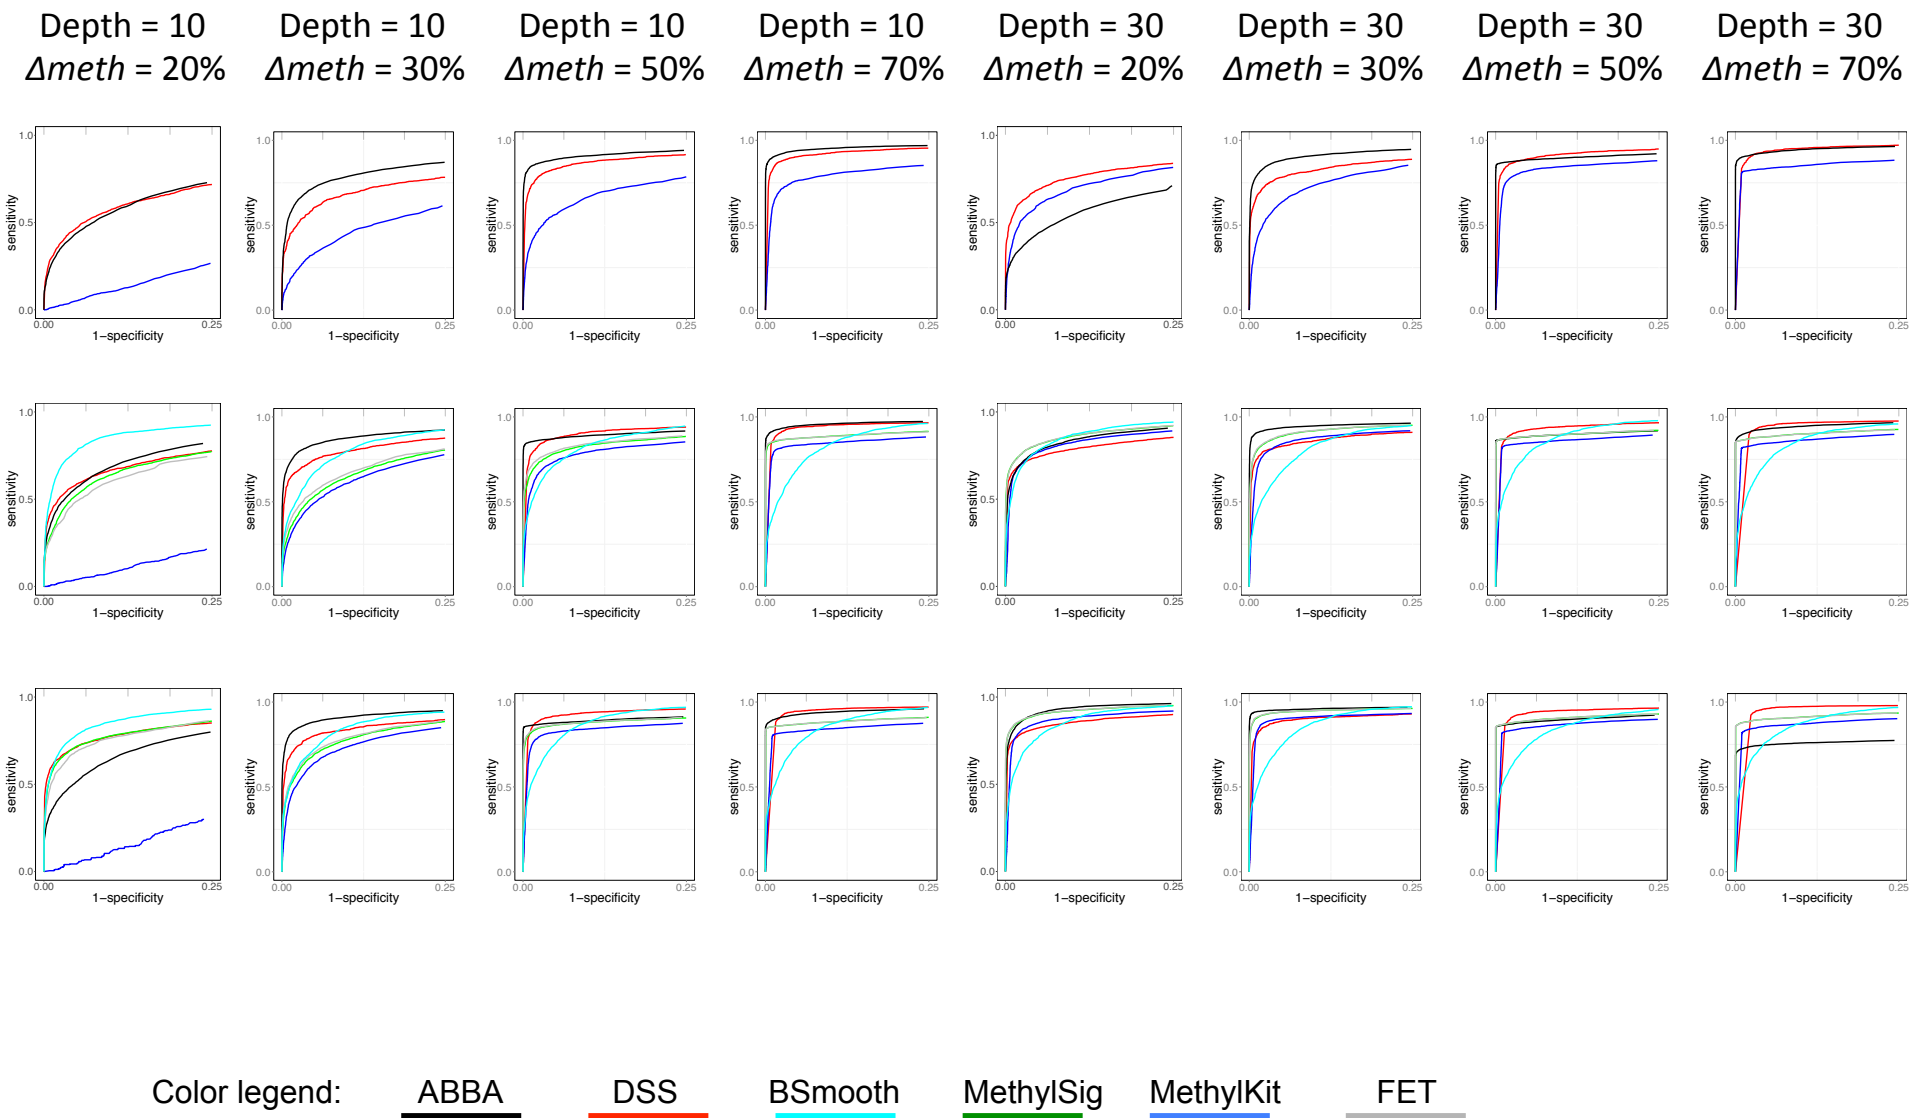

**Supplementary Figure 7b:** ROC curves showing the performance of published techniques and ABBA over various experimentally relevant parameter settings, for a description of parameters see Methods. Parameters:  $s_0=0.2$ ,  $\delta = 10\%$ , and rows 1-3 refer to  $r=1$  to  $r=3$ .

Depth = 10  $\Delta meth = 20\%$     Depth = 10  $\Delta meth = 30\%$     Depth = 10  $\Delta meth = 50\%$     Depth = 10  $\Delta meth = 70\%$     Depth = 30  $\Delta meth = 20\%$     Depth = 30  $\Delta meth = 30\%$     Depth = 30  $\Delta meth = 50\%$     Depth = 30  $\Delta meth = 70\%$

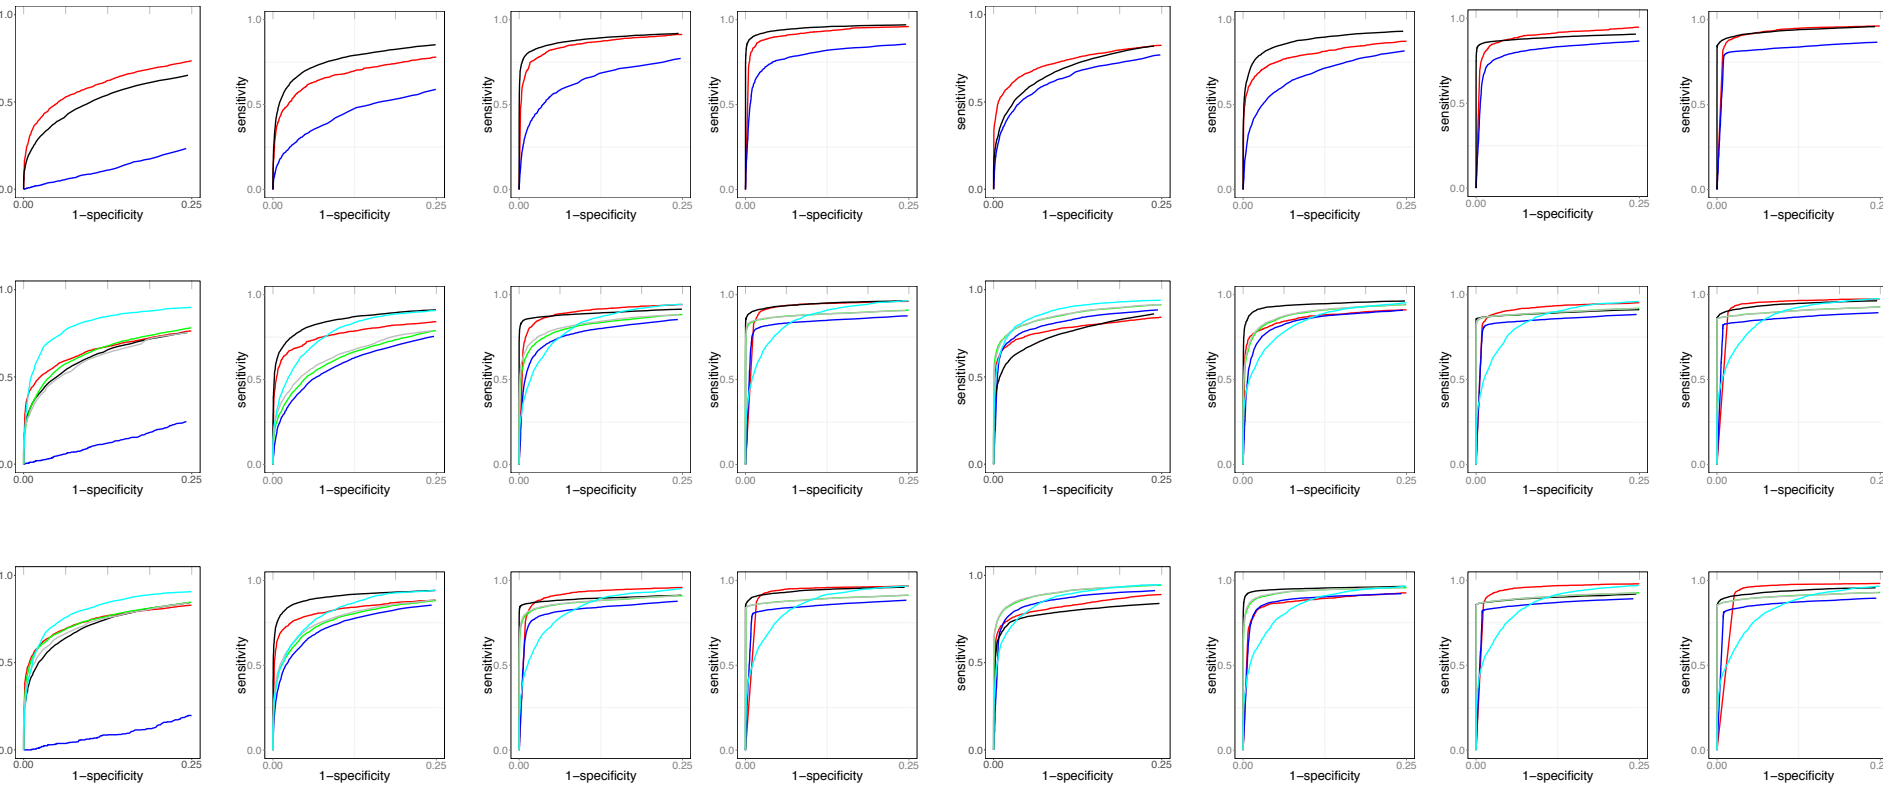

Color legend:    ABBA    DSS    BSmooth    MethylSig    MethylKit    FET

**Supplementary Figure 7c:** ROC curves showing the performance of published techniques and ABBA over various experimentally relevant parameter settings, for a description of parameters see Methods. Parameters:  $s_0=0.3$ ,  $\delta = 10\%$ , and rows 1-3 refer to  $r=1$  to  $r=3$ .

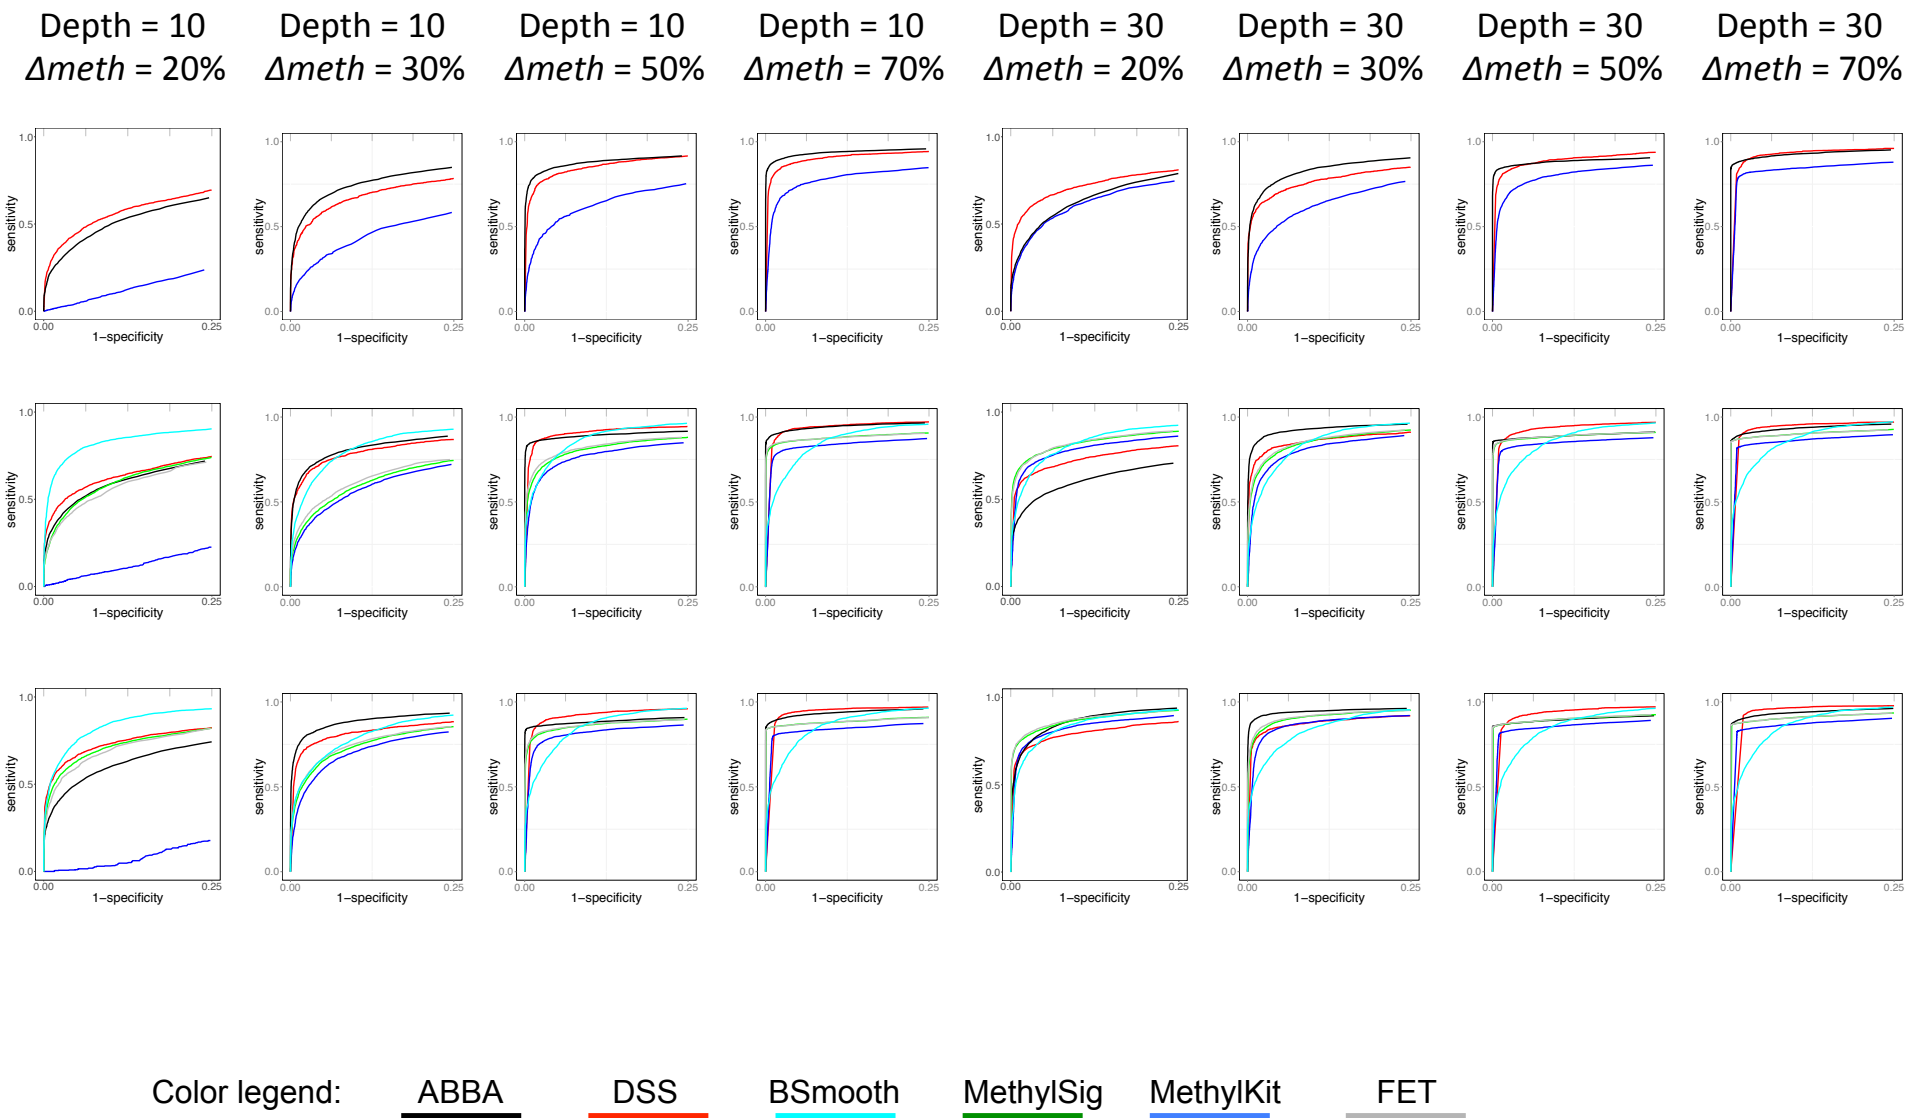

Supplement: 1443FigureS7.pdf [file 1443FigureS7.pdf]
