# Supplementary material for: A Bayesian Approach for Analysis of Whole-Genome Bisulfite Sequencing Data Identifies Disease-Associated Changes in DNA Methylation
Source: PubMed Central journal article supplement (PMC5378105; doi:10.1534/genetics.116.195008), 2017-02-16

**Supplementary Figure 8.** Representative examples for the ROC curves obtained by running metilene in comparison with other methods tested. Parameterizations for the simulations used to generate these ROC curves are as follows: (i)  $s_0 = 0.1$ ,  $\Delta meth = 30\%$ ,  $r = 1$ , average read depth per CpG of 10x,  $\bar{\delta} = 0$ ; (ii)  $s_0 = 0.3$ ,  $\Delta meth = 30\%$ ,  $r = 3$ , average read depth per CpG of 10x,  $\bar{\delta} = 0$ ; (iii)  $s_0 = 0.2$ ,  $\Delta meth = 70\%$ ,  $r = 2$ , average read depth per CpG of 30x,  $\bar{\delta} = 0$ ; (iv)  $s_0 = 0.1$ ,  $\Delta meth = 70\%$ ,  $r = 1$ , average read depth per CpG of 30x,  $\bar{\delta} = 5\%$ ; (v)  $s_0 = 0.2$ ,  $\Delta meth = 30\%$ ,  $r = 2$ , average read depth per CpG of 10x,  $\bar{\delta} = 10\%$ ; (vi)  $s_0 = 0.3$ ,  $\Delta meth = 70\%$ ,  $r = 3$ , average read depth per CpG of 30x,  $\bar{\delta} = 10\%$ . Yellow dots indicate the individual results obtained from metilene, which have been averaged and then interpolated to generate the ROC for this approach (magenta line).

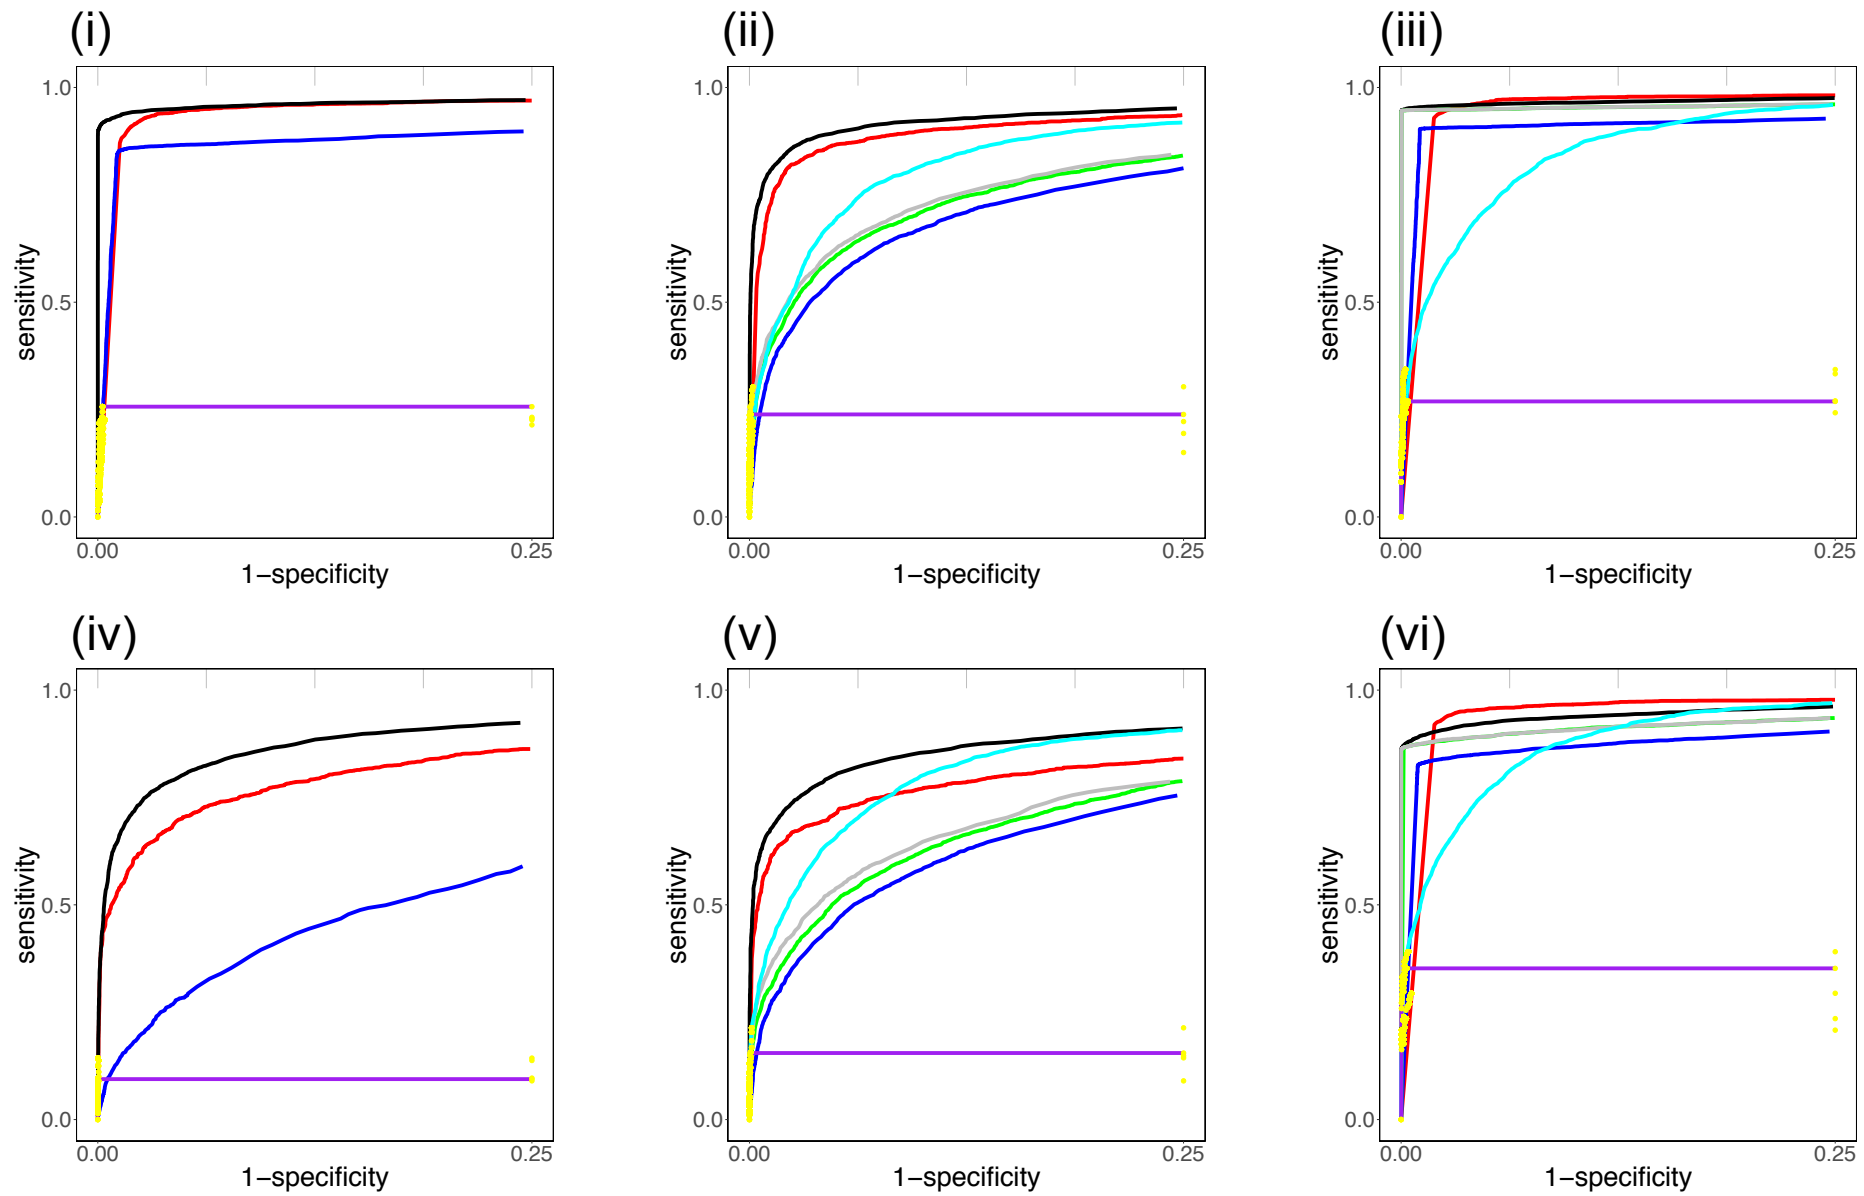

Supplement: 1443FigureS8.pdf [file 1443FigureS8.pdf]
