# Supplementary material for: A Bayesian Approach for Analysis of Whole-Genome Bisulfite Sequencing Data Identifies Disease-Associated Changes in DNA Methylation
Source: PubMed Central journal article supplement (PMC5378105; doi:10.1534/genetics.116.195008), 2017-02-16
Supplement: 1443TableS1.pdf [file 1443TableS1.pdf]

**Supplementary Table 1.** Posterior distribution of the precision parameters  $\sigma_g^{-2}$  and  $\rho_g^{-2}$  under INLA default (0.1,0.1) and alternative (0.01,0.01) parameterization for selected simulated examples:  $(a, b)$  refers to the parameterization of the precision densities while  $r$ ,  $\lambda$ ,  $s_0$ ,  $\Delta meth$  and  $\delta$  refer to the number of replicates, the average read depth, the level of noise, the methylation probability difference and the level of random perturbation (see Methods for further details about the parameters used in the simulations).

| Parameters simulations |     |           |       |               |          | Posterior density |           |                    |               |              |                |
|------------------------|-----|-----------|-------|---------------|----------|-------------------|-----------|--------------------|---------------|--------------|----------------|
| $(a, b)$               | $r$ | $\lambda$ | $s_0$ | $\Delta meth$ | $\delta$ | $g=2$             | Mean      | Standard deviation | 2.5% quantile | 50% quantile | 97.5% quantile |
| (0.1,0.1)              | 1   | 30        | 0.2   | 0.3           | 0.05     | $\sigma_g^{-2}$   | 9.0729    | 0.6758             | 7.8368        | 9.0400       | 10.4911        |
|                        |     |           |       |               |          | $\rho_g^{-2}$     | 1880.7466 | 100.6382           | 1689.5549     | 1878.6136    | 2084.5644      |
| (0.1,0.1)              | 2   | 30        | 0.2   | 0.3           | 0.05     | $\sigma_g^{-2}$   | 8.6061    | 0.4644             | 7.7401        | 8.5890       | 9.5655         |
|                        |     |           |       |               |          | $\rho_g^{-2}$     | 1632.7565 | 78.6897            | 1481.9587     | 1631.5982    | 1790.8550      |
| (0.1,0.1)              | 3   | 30        | 0.2   | 0.3           | 0.05     | $\sigma_g^{-2}$   | 9.2996    | 0.5599             | 8.2602        | 9.2775       | 10.4607        |
|                        |     |           |       |               |          | $\rho_g^{-2}$     | 1671.8780 | 82.8469            | 1514.0137     | 1670.3027    | 1839.2332      |
| (0.1,0.1)              | 1   | 30        | 0.2   | 0.5           | 0.05     | $\sigma_g^{-2}$   | 8.3296    | 0.6129             | 7.2066        | 8.3002       | 9.6136         |
|                        |     |           |       |               |          | $\rho_g^{-2}$     | 1617.9111 | 85.0787            | 1456.0105     | 1616.1979    | 1790.1218      |
| (0.1,0.1)              | 2   | 30        | 0.2   | 0.5           | 0.05     | $\sigma_g^{-2}$   | 9.6289    | 0.5638             | 8.5684        | 9.6119       | 10.7827        |
|                        |     |           |       |               |          | $\rho_g^{-2}$     | 1635.3649 | 77.6139            | 1487.8252     | 1633.6680    | 1792.5946      |
| (0.1,0.1)              | 3   | 30        | 0.2   | 0.5           | 0.05     | $\sigma_g^{-2}$   | 9.6923    | 0.5909             | 8.5810        | 9.6750       | 10.9025        |
|                        |     |           |       |               |          | $\rho_g^{-2}$     | 1638.4463 | 78.6457            | 1489.5000     | 1636.4900    | 1798.3660      |
| (0.1,0.1)              | 1   | 30        | 0.2   | 0.7           | 0.05     | $\sigma_g^{-2}$   | 5.7587    | 0.3663             | 5.0799        | 5.7444       | 6.5169         |
|                        |     |           |       |               |          | $\rho_g^{-2}$     | 1151.5099 | 58.9534            | 1039.3727     | 1150.2486    | 1270.9486      |
| (0.1,0.1)              | 2   | 30        | 0.2   | 0.7           | 0.05     | $\sigma_g^{-2}$   | 5.8216    | 0.2811             | 5.2898        | 5.8144       | 6.3947         |
|                        |     |           |       |               |          | $\rho_g^{-2}$     | 1350.8436 | 65.9308            | 1225.7229     | 1349.3751    | 1484.6081      |
| (0.1,0.1)              | 3   | 30        | 0.2   | 0.7           | 0.05     | $\sigma_g^{-2}$   | 6.8412    | 0.3049             | 6.2625        | 6.8340       | 7.4611         |
|                        |     |           |       |               |          | $\rho_g^{-2}$     | 1382.2827 | 62.8940            | 1262.7061     | 1380.9600    | 1509.7034      |

| Parameters simulations |     |           |       |               |          | Posterior density |           |                    |            |           |             |
|------------------------|-----|-----------|-------|---------------|----------|-------------------|-----------|--------------------|------------|-----------|-------------|
| $(a, b)$               | $r$ | $\lambda$ | $s_0$ | $\Delta meth$ | $\delta$ | $g=2$             | Mean      | Standard deviation | 2.5% quant | 50% quant | 97.5% quant |
| (0.01,0.01)            | 1   | 30        | 0.2   | 0.3           | 0.05     | $\sigma_g^{-2}$   | 8.8469    | 0.6533             | 7.6596     | 8.8112    | 10.2276     |
|                        |     |           |       |               |          | $\rho_g^{-2}$     | 1651.3671 | 84.8279            | 1489.6199  | 1649.9041 | 1822.5088   |
| (0.01,0.01)            | 2   | 30        | 0.2   | 0.3           | 0.05     | $\sigma_g^{-2}$   | 10.0552   | 0.5782             | 8.9752     | 10.0348   | 11.2487     |
|                        |     |           |       |               |          | $\rho_g^{-2}$     | 1679.0064 | 76.4557            | 1532.5270  | 1677.8633 | 1832.4442   |
| (0.01,0.01)            | 3   | 30        | 0.2   | 0.3           | 0.05     | $\sigma_g^{-2}$   | 10.2526   | 0.5182             | 9.2755     | 10.2378   | 11.3132     |
|                        |     |           |       |               |          | $\rho_g^{-2}$     | 1593.9606 | 70.6807            | 1459.0608  | 1592.7067 | 1736.4999   |
| (0.01,0.01)            | 1   | 30        | 0.2   | 0.5           | 0.05     | $\sigma_g^{-2}$   | 8.9345    | 0.6855             | 7.7005     | 8.8926    | 10.3932     |
|                        |     |           |       |               |          | $\rho_g^{-2}$     | 1466.6565 | 73.4093            | 1328.4237  | 1464.4492 | 1617.0846   |
| (0.01,0.01)            | 2   | 30        | 0.2   | 0.5           | 0.05     | $\sigma_g^{-2}$   | 9.2826    | 0.4510             | 8.4315     | 9.2700    | 10.2048     |
|                        |     |           |       |               |          | $\rho_g^{-2}$     | 1576.0755 | 70.7379            | 1441.3941  | 1574.7220 | 1719.0315   |
| (0.01,0.01)            | 3   | 30        | 0.2   | 0.5           | 0.05     | $\sigma_g^{-2}$   | 8.6662    | 0.4332             | 7.8520     | 8.6525    | 9.5555      |
|                        |     |           |       |               |          | $\rho_g^{-2}$     | 1443.9412 | 67.0582            | 1315.8399  | 1442.7964 | 1578.9243   |
| (0.01,0.01)            | 1   | 30        | 0.2   | 0.7           | 0.05     | $\sigma_g^{-2}$   | 6.1100    | 0.3056             | 5.5347     | 6.1007    | 6.7367      |
|                        |     |           |       |               |          | $\rho_g^{-2}$     | 1286.7485 | 63.4107            | 1166.3553  | 1285.3732 | 1415.2569   |
| (0.01,0.01)            | 2   | 30        | 0.2   | 0.7           | 0.05     | $\sigma_g^{-2}$   | 6.1109    | 0.2637             | 5.6098     | 6.1051    | 6.6460      |
|                        |     |           |       |               |          | $\rho_g^{-2}$     | 1352.3358 | 62.3716            | 1233.9427  | 1350.9429 | 1478.9524   |
| (0.01,0.01)            | 3   | 30        | 0.2   | 0.7           | 0.05     | $\sigma_g^{-2}$   | 7.4169    | 0.3634             | 6.7317     | 7.4065    | 8.1605      |
|                        |     |           |       |               |          | $\rho_g^{-2}$     | 1395.5104 | 65.6492            | 1270.7397  | 1394.1411 | 1528.4495   |
