# Supplementary material for: A Bayesian Approach for Analysis of Whole-Genome Bisulfite Sequencing Data Identifies Disease-Associated Changes in DNA Methylation
Source: PubMed Central journal article supplement (PMC5378105; doi:10.1534/genetics.116.195008), 2017-02-16
Supplement: 1443TableS2.pdf [file 1443TableS2.pdf]

**Supplementary Table 2.** Sensitivity analysis of  $E(\pi_{irg})$ ,  $[V(\pi_{irg})]^{1/2}$  and 95%CI of  $\pi_{irg}$  for different values of the noise level ( $s_0 = 0.1, 0.2, 0.3$ ) and selected values of  $\pi_{rg} = 0.1, 0.5$  and  $0.99$ . Values of  $E(\pi_{irg})$ ,  $[V(\pi_{irg})]^{1/2}$  and 95%CI of  $\pi_{irg}$  are obtained by stochastic simulation, generating  $10^7$  observations from the logistic-normal distribution  $L(\pi_{rg}, s_0)$ .

| $s_0$      | $\pi_{rg} = 0.1$ |                        |                  | $\pi_{rg} = 0.5$ |                        |                  | $\pi_{rg} = 0.99$ |                        |                  |
|------------|------------------|------------------------|------------------|------------------|------------------------|------------------|-------------------|------------------------|------------------|
|            | $E(\pi_{irg})$   | $[V(\pi_{irg})]^{1/2}$ | 95%CI            | $E(\pi_{irg})$   | $[V(\pi_{irg})]^{1/2}$ | 95%CI            | $E(\pi_{irg})$    | $[V(\pi_{irg})]^{1/2}$ | 95%CI            |
| <b>0.1</b> | 0.1036           | 0.0295                 | 0.0564<br>0.1711 | 0.5000           | 0.0775                 | 0.3499<br>0.6501 | 0.9895            | 0.0034                 | 0.9816<br>0.9946 |
| <b>0.2</b> | 0.1072           | 0.0436                 | 0.0442<br>0.2107 | 0.5000           | 0.1068                 | 0.2937<br>0.7061 | 0.9890            | 0.0051                 | 0.9763<br>0.9958 |
| <b>0.3</b> | 0.1107           | 0.0548                 | 0.0366<br>0.2453 | 0.5000           | 0.1281                 | 0.2548<br>0.7452 | 0.9884            | 0.0067                 | 0.9713<br>0.9966 |
