# Supplementary material for: A Bayesian Approach for Analysis of Whole-Genome Bisulfite Sequencing Data Identifies Disease-Associated Changes in DNA Methylation
Source: PubMed Central journal article supplement (PMC5378105; doi:10.1534/genetics.116.195008), 2017-02-16
Supplement: 1443TableS3.pdf [file 1443TableS3.pdf]

**Supplementary Table 3.** List of differentially methylated regions (n=427 DMRs) identified at FDR < 0.05. Additional details are shown in the table below.

| <b>Differentially methylated regions (DMRs)</b> |                            |                          |                      |                                       |                    |
|-------------------------------------------------|----------------------------|--------------------------|----------------------|---------------------------------------|--------------------|
| <i>Chr.</i>                                     | <i>Start position (bp)</i> | <i>End position (bp)</i> | <i>Number of CpG</i> | <i>Delta in methylation (LEW-WKY)</i> | <i>Length (bp)</i> |
| 10                                              | 68,789,190                 | 68,789,566               | 8                    | 0.388                                 | 376                |
| 9                                               | 65,578,002                 | 65,578,018               | 9                    | 0.376                                 | 16                 |
| 20                                              | 7,471,342                  | 7,471,507                | 6                    | -0.411                                | 165                |
| 11                                              | 85,847,836                 | 85,848,164               | 8                    | 0.411                                 | 328                |
| 1                                               | 201,199,522                | 201,200,184              | 19                   | -0.393                                | 662                |
| 1                                               | 135,484,912                | 135,485,255              | 43                   | -0.354                                | 343                |
| 14                                              | 84,172,871                 | 84,173,390               | 16                   | 0.493                                 | 519                |
| 14                                              | 84,172,871                 | 84,173,390               | 16                   | 0.493                                 | 519                |
| 14                                              | 84,172,871                 | 84,173,390               | 16                   | 0.493                                 | 519                |
| 14                                              | 84,172,871                 | 84,173,390               | 16                   | 0.493                                 | 519                |
| 2                                               | 244,382,223                | 244,382,456              | 6                    | -0.488                                | 233                |
| 9                                               | 8,052,044                  | 8,052,235                | 8                    | -0.369                                | 191                |
| 1                                               | 159,315,263                | 159,315,432              | 7                    | -0.397                                | 169                |
| 10                                              | 91,103,844                 | 91,104,178               | 9                    | -0.429                                | 334                |
| 1                                               | 213,078,596                | 213,079,072              | 5                    | -0.372                                | 476                |
| 5                                               | 76,087,419                 | 76,088,118               | 19                   | -0.449                                | 699                |
| 5                                               | 76,087,419                 | 76,088,118               | 19                   | -0.449                                | 699                |
| 1                                               | 249,470,979                | 249,471,171              | 7                    | 0.356                                 | 192                |
| 1                                               | 47,244,465                 | 47,244,525               | 5                    | 0.402                                 | 60                 |
| 10                                              | 68,549,388                 | 68,549,672               | 7                    | -0.379                                | 284                |
| 10                                              | 68,789,190                 | 68,789,566               | 8                    | 0.388                                 | 376                |
| 2                                               | 244,286,406                | 244,286,792              | 8                    | 0.395                                 | 386                |
| 2                                               | 244,285,393                | 244,285,537              | 6                    | -0.351                                | 144                |
| 1                                               | 246,217,613                | 246,217,908              | 6                    | -0.422                                | 295                |
| 1                                               | 246,217,613                | 246,217,908              | 6                    | -0.422                                | 295                |
| 7                                               | 117,335,736                | 117,336,128              | 6                    | 0.346                                 | 392                |
| 11                                              | 85,847,836                 | 85,848,164               | 8                    | 0.411                                 | 328                |
| 6                                               | 7,949,640                  | 7,949,973                | 6                    | 0.429                                 | 333                |
| 7                                               | 135,296,975                | 135,297,088              | 5                    | -0.419                                | 113                |
| 7                                               | 135,296,975                | 135,297,088              | 5                    | -0.419                                | 113                |
| 14                                              | 84,172,871                 | 84,173,390               | 16                   | 0.493                                 | 519                |
| 14                                              | 84,172,871                 | 84,173,390               | 16                   | 0.493                                 | 519                |
| 14                                              | 92,374,023                 | 92,374,031               | 5                    | 0.373                                 | 8                  |

|    |             |             |    |        |     |
|----|-------------|-------------|----|--------|-----|
| 18 | 71,444,981  | 71,445,138  | 7  | -0.438 | 157 |
| 18 | 71,444,981  | 71,445,138  | 7  | -0.438 | 157 |
| 18 | 71,444,981  | 71,445,138  | 7  | -0.438 | 157 |
| 5  | 155,578,344 | 155,578,692 | 7  | 0.398  | 348 |
| 5  | 155,446,650 | 155,447,336 | 9  | 0.346  | 686 |
| 5  | 155,447,682 | 155,447,726 | 5  | 0.357  | 44  |
| 4  | 117,447,942 | 117,448,201 | 6  | 0.431  | 259 |
| 4  | 117,447,942 | 117,448,201 | 6  | 0.431  | 259 |
| 4  | 48,334,740  | 48,334,986  | 6  | 0.377  | 246 |
| 4  | 48,334,740  | 48,334,986  | 6  | 0.377  | 246 |
| 4  | 48,334,740  | 48,334,986  | 6  | 0.377  | 246 |
| 8  | 11,391,719  | 11,392,350  | 9  | -0.398 | 631 |
| 8  | 11,391,719  | 11,392,350  | 9  | -0.398 | 631 |
| 2  | 244,382,223 | 244,382,456 | 6  | -0.488 | 233 |
| 9  | 8,052,044   | 8,052,235   | 8  | -0.369 | 191 |
| 1  | 190,990,317 | 190,990,437 | 7  | -0.648 | 120 |
| 13 | 44,601,546  | 44,601,743  | 6  | -0.337 | 197 |
| 13 | 44,601,546  | 44,601,743  | 6  | -0.337 | 197 |
| 5  | 153,336,351 | 153,336,935 | 15 | -0.432 | 584 |
| 5  | 153,345,531 | 153,346,146 | 13 | -0.461 | 615 |
| 5  | 153,345,531 | 153,346,146 | 13 | -0.461 | 615 |
| 5  | 153,336,351 | 153,336,935 | 15 | -0.432 | 584 |
| 8  | 75,999,078  | 75,999,242  | 8  | 0.481  | 164 |
| 8  | 75,999,078  | 75,999,242  | 8  | 0.481  | 164 |
| 1  | 250,085,410 | 250,085,533 | 5  | 0.347  | 123 |
| 9  | 65,578,002  | 65,578,018  | 9  | 0.376  | 16  |
| 9  | 65,578,002  | 65,578,018  | 9  | 0.376  | 16  |
| 9  | 65,578,002  | 65,578,018  | 9  | 0.376  | 16  |
| 10 | 91,103,844  | 91,104,178  | 9  | -0.429 | 334 |
| 2  | 182,060,749 | 182,061,173 | 11 | -0.406 | 424 |
| 2  | 182,060,749 | 182,061,173 | 11 | -0.406 | 424 |
| 6  | 115,280,790 | 115,281,128 | 9  | -0.383 | 338 |
| 5  | 70,555,077  | 70,555,215  | 6  | -0.550 | 138 |
| 5  | 70,555,077  | 70,555,215  | 6  | -0.550 | 138 |
| 5  | 76,087,419  | 76,088,118  | 19 | -0.449 | 699 |
| 1  | 249,470,979 | 249,471,171 | 7  | 0.356  | 192 |
| 1  | 249,470,979 | 249,471,171 | 7  | 0.356  | 192 |
| 1  | 249,470,979 | 249,471,171 | 7  | 0.356  | 192 |

|    |             |             |    |        |     |
|----|-------------|-------------|----|--------|-----|
| 3  | 134,342,611 | 134,342,621 | 6  | 0.426  | 10  |
| 3  | 134,416,266 | 134,416,684 | 9  | 0.400  | 418 |
| 4  | 157,369,967 | 157,369,979 | 7  | 0.382  | 12  |
| 5  | 154,761,710 | 154,762,122 | 14 | 0.363  | 412 |
| 15 | 9,324,042   | 9,324,638   | 8  | -0.392 | 596 |
| 15 | 9,324,042   | 9,324,638   | 8  | -0.392 | 596 |
| 11 | 74,423,528  | 74,423,536  | 5  | 0.352  | 8   |
| 1  | 196,783,603 | 196,784,043 | 11 | 0.379  | 440 |
| 1  | 196,783,603 | 196,784,043 | 11 | 0.379  | 440 |
| 16 | 7,121,594   | 7,121,762   | 6  | -0.490 | 168 |
| 20 | 13,130,833  | 13,131,181  | 5  | -0.337 | 348 |
| 20 | 7,471,342   | 7,471,507   | 6  | -0.411 | 165 |
| 20 | 7,471,342   | 7,471,507   | 6  | -0.411 | 165 |
| 13 | 48,283,546  | 48,283,871  | 5  | 0.436  | 325 |
| 13 | 48,283,546  | 48,283,871  | 5  | 0.436  | 325 |
| 11 | 85,847,836  | 85,848,164  | 8  | 0.411  | 328 |
| 11 | 85,847,836  | 85,848,164  | 8  | 0.411  | 328 |
| 11 | 85,847,836  | 85,848,164  | 8  | 0.411  | 328 |
| 1  | 201,199,522 | 201,200,184 | 19 | -0.393 | 662 |
| 5  | 160,519,056 | 160,519,506 | 8  | -0.397 | 450 |
| 1  | 186,478,917 | 186,479,089 | 6  | -0.335 | 172 |
| 2  | 244,285,393 | 244,285,537 | 6  | -0.351 | 144 |
| 10 | 91,103,844  | 91,104,178  | 9  | -0.429 | 334 |
| 5  | 76,203,959  | 76,203,980  | 5  | 0.335  | 21  |
| 1  | 159,315,263 | 159,315,432 | 7  | -0.397 | 169 |
| 1  | 213,078,596 | 213,079,072 | 5  | -0.372 | 476 |
| 11 | 85,847,836  | 85,848,164  | 8  | 0.411  | 328 |
| 1  | 201,199,522 | 201,200,184 | 19 | -0.393 | 662 |
| 10 | 91,103,844  | 91,104,178  | 9  | -0.429 | 334 |
| 10 | 45,286,705  | 45,286,953  | 6  | -0.338 | 248 |
| 10 | 45,286,705  | 45,286,953  | 6  | -0.338 | 248 |
| 10 | 45,286,705  | 45,286,953  | 6  | -0.338 | 248 |
| 10 | 45,286,705  | 45,286,953  | 6  | -0.338 | 248 |
| 10 | 45,286,705  | 45,286,953  | 6  | -0.338 | 248 |
| 10 | 45,286,705  | 45,286,953  | 6  | -0.338 | 248 |
| 8  | 85,309,118  | 85,309,328  | 5  | 0.417  | 210 |
| 8  | 85,309,118  | 85,309,328  | 5  | 0.417  | 210 |
| 8  | 126,281,337 | 126,281,606 | 6  | 0.360  | 269 |

|    |             |             |    |        |     |
|----|-------------|-------------|----|--------|-----|
| 8  | 126,281,337 | 126,281,606 | 6  | 0.360  | 269 |
| 8  | 126,281,337 | 126,281,606 | 6  | 0.360  | 269 |
| 8  | 126,281,337 | 126,281,606 | 6  | 0.360  | 269 |
| 9  | 86,786,809  | 86,786,843  | 5  | -0.439 | 34  |
| 2  | 22,695,411  | 22,696,273  | 19 | 0.372  | 862 |
| 7  | 80,606,707  | 80,606,758  | 7  | -0.406 | 51  |
| 19 | 50,424,154  | 50,424,775  | 12 | -0.347 | 621 |
| 3  | 33,805,390  | 33,805,520  | 6  | 0.354  | 130 |
| 8  | 59,704,529  | 59,704,768  | 5  | -0.553 | 239 |
| X  | 12,543,997  | 12,544,127  | 9  | -0.359 | 130 |
| X  | 12,543,997  | 12,544,127  | 9  | -0.359 | 130 |
| 7  | 31,729,909  | 31,729,925  | 5  | 0.631  | 16  |
| 13 | 66,828,295  | 66,828,461  | 8  | 0.354  | 166 |
| 13 | 66,828,295  | 66,828,461  | 8  | 0.354  | 166 |
| 3  | 134,626,281 | 134,626,603 | 6  | -0.472 | 322 |
| 3  | 134,626,281 | 134,626,603 | 6  | -0.472 | 322 |
| 3  | 134,626,281 | 134,626,603 | 6  | -0.472 | 322 |
| 1  | 253,035,706 | 253,035,897 | 8  | -0.356 | 191 |
| 1  | 253,035,706 | 253,035,897 | 8  | -0.356 | 191 |
| 8  | 113,765,414 | 113,765,749 | 5  | 0.449  | 335 |
| 16 | 82,838,635  | 82,838,679  | 5  | 0.460  | 44  |
| 16 | 82,838,635  | 82,838,679  | 5  | 0.460  | 44  |
| 1  | 41,153,148  | 41,153,356  | 5  | 0.389  | 208 |
| 7  | 140,097,766 | 140,098,056 | 16 | -0.381 | 290 |
| 7  | 140,097,766 | 140,098,056 | 16 | -0.381 | 290 |
| 7  | 140,097,766 | 140,098,056 | 16 | -0.381 | 290 |
| 7  | 140,097,766 | 140,098,056 | 16 | -0.381 | 290 |
| 11 | 68,731,193  | 68,731,412  | 5  | 0.412  | 219 |
| 11 | 68,731,193  | 68,731,412  | 5  | 0.412  | 219 |
| 11 | 68,731,193  | 68,731,412  | 5  | 0.412  | 219 |
| 4  | 87,163,138  | 87,163,811  | 7  | -0.387 | 673 |
| 4  | 87,163,138  | 87,163,811  | 7  | -0.387 | 673 |
| 2  | 145,004,434 | 145,005,279 | 9  | -0.501 | 845 |
| 2  | 145,004,434 | 145,005,279 | 9  | -0.501 | 845 |
| 4  | 184,204,699 | 184,204,723 | 5  | 0.362  | 24  |
| 1  | 171,743,067 | 171,743,305 | 5  | -0.556 | 238 |
| 1  | 171,993,800 | 171,994,086 | 13 | 0.679  | 286 |
| 14 | 81,650,728  | 81,650,744  | 6  | 0.415  | 16  |

|    |             |             |    |        |      |
|----|-------------|-------------|----|--------|------|
| 14 | 81,650,728  | 81,650,744  | 6  | 0.415  | 16   |
| 18 | 78,990,391  | 78,991,032  | 8  | 0.404  | 641  |
| 18 | 78,990,391  | 78,991,032  | 8  | 0.404  | 641  |
| 1  | 8,656,997   | 8,657,837   | 9  | 0.348  | 840  |
| 1  | 8,658,157   | 8,658,360   | 7  | 0.385  | 203  |
| 1  | 8,687,740   | 8,687,867   | 5  | -0.360 | 127  |
| 1  | 135,484,912 | 135,485,255 | 43 | -0.354 | 343  |
| 1  | 135,484,912 | 135,485,255 | 43 | -0.354 | 343  |
| 1  | 135,484,912 | 135,485,255 | 43 | -0.354 | 343  |
| X  | 21,065,942  | 21,065,954  | 7  | 0.366  | 12   |
| X  | 21,065,942  | 21,065,954  | 7  | 0.366  | 12   |
| X  | 21,065,942  | 21,065,954  | 7  | 0.366  | 12   |
| X  | 21,065,942  | 21,065,954  | 7  | 0.366  | 12   |
| X  | 21,065,942  | 21,065,954  | 7  | 0.366  | 12   |
| X  | 21,065,942  | 21,065,954  | 7  | 0.366  | 12   |
| 8  | 51,013,364  | 51,014,520  | 26 | -0.363 | 1156 |
| 4  | 78,570,503  | 78,570,515  | 6  | -0.361 | 12   |
| 4  | 78,570,503  | 78,570,515  | 6  | -0.361 | 12   |
| 4  | 78,570,503  | 78,570,515  | 6  | -0.361 | 12   |
| 1  | 201,692,359 | 201,692,898 | 6  | -0.431 | 539  |
| 1  | 201,692,359 | 201,692,898 | 6  | -0.431 | 539  |
| 1  | 201,692,359 | 201,692,898 | 6  | -0.431 | 539  |
| 7  | 127,373,180 | 127,373,588 | 10 | 0.343  | 408  |
| 7  | 127,373,180 | 127,373,588 | 10 | 0.343  | 408  |
| 7  | 127,373,180 | 127,373,588 | 10 | 0.343  | 408  |
| 7  | 127,373,180 | 127,373,588 | 10 | 0.343  | 408  |
| 7  | 127,373,180 | 127,373,588 | 10 | 0.343  | 408  |
| 7  | 127,373,180 | 127,373,588 | 10 | 0.343  | 408  |
| 7  | 127,373,180 | 127,373,588 | 10 | 0.343  | 408  |
| 7  | 127,373,180 | 127,373,588 | 10 | 0.343  | 408  |
| 7  | 127,373,180 | 127,373,588 | 10 | 0.343  | 408  |
| 1  | 260,004,778 | 260,005,055 | 5  | 0.433  | 277  |
| 1  | 260,004,778 | 260,005,055 | 5  | 0.433  | 277  |
| 1  | 260,004,778 | 260,005,055 | 5  | 0.433  | 277  |
| 1  | 13,385,349  | 13,385,499  | 8  | -0.393 | 150  |
| 1  | 13,482,975  | 13,483,125  | 7  | -0.389 | 150  |
| 6  | 99,479,034  | 99,479,581  | 17 | 0.353  | 547  |
| 12 | 35,455,412  | 35,455,802  | 6  | -0.440 | 390  |
| 19 | 57,252,546  | 57,252,576  | 5  | -0.351 | 30   |

|    |             |             |    |        |     |
|----|-------------|-------------|----|--------|-----|
| 19 | 57,252,546  | 57,252,576  | 5  | -0.351 | 30  |
| 19 | 57,252,546  | 57,252,576  | 5  | -0.351 | 30  |
| 19 | 57,252,546  | 57,252,576  | 5  | -0.351 | 30  |
| 5  | 62,025,389  | 62,025,405  | 6  | -0.421 | 16  |
| 1  | 220,502,532 | 220,502,663 | 5  | 0.350  | 131 |
| 1  | 220,502,532 | 220,502,663 | 5  | 0.350  | 131 |
| 14 | 44,839,477  | 44,839,645  | 6  | -0.433 | 168 |
| 7  | 32,705,794  | 32,706,239  | 6  | -0.364 | 445 |
| 16 | 82,879,993  | 82,880,104  | 5  | 0.422  | 111 |
| 11 | 68,600,018  | 68,600,266  | 8  | 0.430  | 248 |
| 11 | 68,600,018  | 68,600,266  | 8  | 0.430  | 248 |
| 11 | 68,600,018  | 68,600,266  | 8  | 0.430  | 248 |
| 11 | 68,600,018  | 68,600,266  | 8  | 0.430  | 248 |
| 3  | 10,211,987  | 10,212,102  | 6  | 0.379  | 115 |
| 8  | 77,853,419  | 77,853,528  | 5  | 0.609  | 109 |
| 9  | 86,654,956  | 86,654,984  | 7  | -0.648 | 28  |
| 9  | 86,654,956  | 86,654,984  | 7  | -0.648 | 28  |
| 6  | 23,978,590  | 23,978,604  | 8  | 0.346  | 14  |
| 16 | 47,600,289  | 47,600,899  | 9  | 0.362  | 610 |
| 16 | 47,600,289  | 47,600,899  | 9  | 0.362  | 610 |
| 16 | 47,600,289  | 47,600,899  | 9  | 0.362  | 610 |
| 19 | 49,647,060  | 49,647,070  | 6  | 0.579  | 10  |
| 2  | 145,004,434 | 145,005,279 | 9  | -0.501 | 845 |
| 15 | 3,439,316   | 3,439,583   | 9  | -0.349 | 267 |
| 15 | 3,418,049   | 3,418,278   | 6  | 0.511  | 229 |
| 3  | 77,663,111  | 77,663,297  | 6  | -0.350 | 186 |
| 2  | 235,373,912 | 235,374,163 | 7  | 0.345  | 251 |
| 20 | 9,687,919   | 9,688,761   | 13 | -0.346 | 842 |
| 1  | 168,052,289 | 168,052,458 | 6  | -0.447 | 169 |
| 12 | 12,549,437  | 12,549,914  | 14 | -0.446 | 477 |
| 10 | 109,943,346 | 109,943,368 | 10 | 0.493  | 22  |
| 1  | 226,659,436 | 226,659,448 | 7  | 0.391  | 12  |
| 1  | 135,046,891 | 135,047,432 | 13 | -0.363 | 541 |
| 2  | 1,577,669   | 1,578,072   | 17 | 0.522  | 403 |
| 2  | 1,577,669   | 1,578,072   | 17 | 0.522  | 403 |
| 2  | 1,577,669   | 1,578,072   | 17 | 0.522  | 403 |
| 2  | 1,577,669   | 1,578,072   | 17 | 0.522  | 403 |
| 12 | 6,607,459   | 6,607,658   | 6  | -0.334 | 199 |

|    |             |             |    |        |     |
|----|-------------|-------------|----|--------|-----|
| 3  | 24,798,384  | 24,798,968  | 6  | 0.354  | 584 |
| 15 | 53,811,079  | 53,811,208  | 7  | 0.385  | 129 |
| 8  | 114,018,335 | 114,018,391 | 5  | 0.375  | 56  |
| 8  | 114,018,335 | 114,018,391 | 5  | 0.375  | 56  |
| 8  | 114,018,335 | 114,018,391 | 5  | 0.375  | 56  |
| 6  | 109,561,731 | 109,561,820 | 5  | -0.339 | 89  |
| 6  | 109,561,731 | 109,561,820 | 5  | -0.339 | 89  |
| 1  | 248,664,997 | 248,665,070 | 7  | -0.439 | 73  |
| 1  | 248,664,997 | 248,665,070 | 7  | -0.439 | 73  |
| 2  | 22,695,411  | 22,696,273  | 19 | 0.372  | 862 |
| 3  | 2,646,042   | 2,646,338   | 8  | 0.354  | 296 |
| 5  | 57,621,245  | 57,621,429  | 5  | 0.372  | 184 |
| 5  | 57,621,245  | 57,621,429  | 5  | 0.372  | 184 |
| 5  | 57,621,245  | 57,621,429  | 5  | 0.372  | 184 |
| 5  | 57,621,245  | 57,621,429  | 5  | 0.372  | 184 |
| 17 | 64,161,533  | 64,161,805  | 7  | 0.347  | 272 |
| 17 | 64,161,533  | 64,161,805  | 7  | 0.347  | 272 |
| 5  | 128,444,856 | 128,444,864 | 5  | -0.453 | 8   |
| 5  | 128,444,856 | 128,444,864 | 5  | -0.453 | 8   |
| 5  | 128,444,856 | 128,444,864 | 5  | -0.453 | 8   |
| 4  | 174,510,556 | 174,510,687 | 6  | 0.422  | 131 |
| 4  | 174,377,854 | 174,377,909 | 8  | 0.553  | 55  |
| 7  | 138,463,613 | 138,463,755 | 7  | -0.415 | 142 |
| 7  | 138,463,613 | 138,463,755 | 7  | -0.415 | 142 |
| 12 | 1,553,097   | 1,553,639   | 7  | 0.336  | 542 |
| 12 | 40,645,872  | 40,646,855  | 13 | 0.451  | 983 |
| 9  | 104,717,293 | 104,717,671 | 8  | -0.410 | 378 |
| 3  | 117,132,673 | 117,132,776 | 7  | -0.559 | 103 |
| 2  | 35,616,505  | 35,616,811  | 5  | -0.445 | 306 |
| 16 | 19,179,611  | 19,179,700  | 5  | 0.396  | 89  |
| 16 | 19,179,611  | 19,179,700  | 5  | 0.396  | 89  |
| 16 | 19,179,611  | 19,179,700  | 5  | 0.396  | 89  |
| 12 | 9,798,096   | 9,798,528   | 5  | 0.382  | 432 |
| 20 | 11,657,538  | 11,657,779  | 5  | 0.341  | 241 |
| 5  | 159,782,313 | 159,782,474 | 5  | 0.421  | 161 |
| 6  | 123,615,494 | 123,615,931 | 5  | 0.344  | 437 |
| 2  | 140,674,350 | 140,674,943 | 6  | 0.451  | 593 |
| 2  | 140,674,350 | 140,674,943 | 6  | 0.451  | 593 |

|    |             |             |    |        |     |
|----|-------------|-------------|----|--------|-----|
| X  | 80,860,449  | 80,860,804  | 5  | 0.549  | 355 |
| 14 | 80,780,951  | 80,781,311  | 7  | -0.376 | 360 |
| 14 | 80,780,951  | 80,781,311  | 7  | -0.376 | 360 |
| 14 | 80,780,951  | 80,781,311  | 7  | -0.376 | 360 |
| 12 | 34,936,105  | 34,936,445  | 12 | -0.392 | 340 |
| 12 | 34,936,105  | 34,936,445  | 12 | -0.392 | 340 |
| 12 | 34,936,105  | 34,936,445  | 12 | -0.392 | 340 |
| 12 | 34,936,105  | 34,936,445  | 12 | -0.392 | 340 |
| 12 | 34,936,105  | 34,936,445  | 12 | -0.392 | 340 |
| 16 | 81,097,893  | 81,097,901  | 5  | 0.428  | 8   |
| 1  | 78,484,675  | 78,484,717  | 11 | 0.516  | 42  |
| 4  | 124,660,465 | 124,660,479 | 7  | 0.479  | 14  |
| 3  | 146,662,303 | 146,662,850 | 6  | 0.348  | 547 |
| 3  | 146,662,303 | 146,662,850 | 6  | 0.348  | 547 |
| 10 | 78,981,800  | 78,981,895  | 5  | -0.492 | 95  |
| 13 | 80,183,729  | 80,184,045  | 7  | 0.398  | 316 |
| 8  | 123,565,017 | 123,565,083 | 5  | 0.411  | 66  |
| 8  | 51,883,825  | 51,883,881  | 5  | 0.386  | 56  |
| 10 | 65,245,219  | 65,245,537  | 8  | 0.368  | 318 |
| 10 | 65,245,219  | 65,245,537  | 8  | 0.368  | 318 |
| 10 | 65,245,219  | 65,245,537  | 8  | 0.368  | 318 |
| 5  | 77,941,785  | 77,941,939  | 6  | 0.354  | 154 |
| 5  | 77,935,978  | 77,936,652  | 9  | 0.484  | 674 |
| 5  | 77,941,785  | 77,941,939  | 6  | 0.354  | 154 |
| 5  | 77,935,978  | 77,936,652  | 9  | 0.484  | 674 |
| 18 | 72,578,834  | 72,578,888  | 9  | -0.350 | 54  |
| X  | 12,543,997  | 12,544,127  | 9  | -0.359 | 130 |
| X  | 12,543,997  | 12,544,127  | 9  | -0.359 | 130 |
| 10 | 65,609,330  | 65,609,916  | 6  | -0.381 | 586 |
| 10 | 65,609,330  | 65,609,916  | 6  | -0.381 | 586 |
| 10 | 65,609,330  | 65,609,916  | 6  | -0.381 | 586 |
| 10 | 65,609,330  | 65,609,916  | 6  | -0.381 | 586 |
| 1  | 189,786,754 | 189,786,764 | 6  | 0.477  | 10  |
| 1  | 189,786,754 | 189,786,764 | 6  | 0.477  | 10  |
| 1  | 189,786,754 | 189,786,764 | 6  | 0.477  | 10  |
| 1  | 189,786,754 | 189,786,764 | 6  | 0.477  | 10  |
| 10 | 90,071,670  | 90,071,742  | 5  | 0.375  | 72  |
| 10 | 90,071,670  | 90,071,742  | 5  | 0.375  | 72  |



|    |             |             |    |        |     |
|----|-------------|-------------|----|--------|-----|
| 10 | 90,071,670  | 90,071,742  | 5  | 0.375  | 72  |
| 10 | 90,071,670  | 90,071,742  | 5  | 0.375  | 72  |
| 5  | 152,236,112 | 152,236,164 | 7  | 0.349  | 52  |
| 5  | 152,236,112 | 152,236,164 | 7  | 0.349  | 52  |
| 5  | 152,236,112 | 152,236,164 | 7  | 0.349  | 52  |
| 8  | 59,855,879  | 59,856,223  | 15 | 0.440  | 344 |
| 10 | 98,799,254  | 98,799,270  | 8  | 0.380  | 16  |
| 15 | 59,738,222  | 59,738,294  | 7  | -0.404 | 72  |
| 15 | 59,738,222  | 59,738,294  | 7  | -0.404 | 72  |
| 2  | 38,088,240  | 38,088,351  | 5  | -0.385 | 111 |
| 2  | 38,088,240  | 38,088,351  | 5  | -0.385 | 111 |
| 2  | 181,737,034 | 181,737,215 | 8  | 0.661  | 181 |
| 13 | 86,648,810  | 86,649,168  | 10 | 0.527  | 358 |
| 9  | 11,843,013  | 11,843,287  | 5  | 0.357  | 274 |
| 9  | 11,843,013  | 11,843,287  | 5  | 0.357  | 274 |
| 3  | 18,998,300  | 18,998,479  | 6  | -0.407 | 179 |
| 18 | 72,117,718  | 72,117,864  | 7  | -0.374 | 146 |
| 18 | 72,117,718  | 72,117,864  | 7  | -0.374 | 146 |
| 17 | 10,919,087  | 10,919,658  | 8  | -0.479 | 571 |
| 9  | 73,664,086  | 73,664,354  | 6  | 0.430  | 268 |
| 9  | 73,664,086  | 73,664,354  | 6  | 0.430  | 268 |
| 9  | 73,664,086  | 73,664,354  | 6  | 0.430  | 268 |
| 1  | 85,260,131  | 85,260,301  | 10 | -0.356 | 170 |
| 1  | 85,260,131  | 85,260,301  | 10 | -0.356 | 170 |
| 5  | 130,486,383 | 130,486,577 | 5  | -0.344 | 194 |
| 5  | 130,486,383 | 130,486,577 | 5  | -0.344 | 194 |
| 5  | 130,486,383 | 130,486,577 | 5  | -0.344 | 194 |
| 4  | 131,861,600 | 131,861,612 | 7  | 0.542  | 12  |
| 5  | 157,136,872 | 157,137,311 | 5  | 0.366  | 439 |
| 14 | 5,382,213   | 5,382,382   | 7  | -0.472 | 169 |
| 3  | 106,195,835 | 106,195,926 | 11 | -0.347 | 91  |
| 3  | 106,195,835 | 106,195,926 | 11 | -0.347 | 91  |
| 3  | 106,195,835 | 106,195,926 | 11 | -0.347 | 91  |
| 9  | 38,628,169  | 38,628,423  | 5  | 0.467  | 254 |
| 13 | 91,565,229  | 91,565,370  | 18 | 0.378  | 141 |
| 13 | 91,565,229  | 91,565,370  | 18 | 0.378  | 141 |
| 1  | 78,860,567  | 78,860,597  | 7  | -0.359 | 30  |
| 9  | 63,532,978  | 63,533,535  | 6  | 0.352  | 557 |

|    |             |             |    |        |     |
|----|-------------|-------------|----|--------|-----|
| 9  | 63,532,978  | 63,533,535  | 6  | 0.352  | 557 |
| 2  | 178,059,485 | 178,060,000 | 14 | -0.539 | 515 |
| 12 | 43,695,393  | 43,695,467  | 8  | -0.448 | 74  |
| 12 | 43,695,393  | 43,695,467  | 8  | -0.448 | 74  |
| 7  | 137,954,632 | 137,954,786 | 6  | -0.493 | 154 |
| 7  | 137,954,632 | 137,954,786 | 6  | -0.493 | 154 |
| 2  | 34,066,465  | 34,066,636  | 5  | 0.601  | 171 |
| 1  | 135,132,836 | 135,133,153 | 7  | 0.350  | 317 |
| 1  | 233,041,339 | 233,041,381 | 6  | 0.339  | 42  |
| 3  | 106,583,026 | 106,583,192 | 5  | 0.397  | 166 |
| 3  | 106,583,026 | 106,583,192 | 5  | 0.397  | 166 |
| 3  | 106,583,026 | 106,583,192 | 5  | 0.397  | 166 |
| 3  | 106,583,026 | 106,583,192 | 5  | 0.397  | 166 |
| 15 | 12,704,935  | 12,705,277  | 17 | -0.369 | 342 |
| 14 | 6,269,076   | 6,269,525   | 5  | 0.344  | 449 |
| 14 | 6,269,076   | 6,269,525   | 5  | 0.344  | 449 |
| 9  | 6,207,562   | 6,208,474   | 12 | 0.440  | 912 |
| 2  | 180,479,749 | 180,479,914 | 11 | 0.346  | 165 |
| 2  | 180,479,749 | 180,479,914 | 11 | 0.346  | 165 |
| 2  | 180,479,749 | 180,479,914 | 11 | 0.346  | 165 |
| 10 | 109,175,668 | 109,175,915 | 5  | 0.365  | 247 |
| 18 | 66,163,003  | 66,163,230  | 6  | -0.549 | 227 |
| 18 | 66,163,003  | 66,163,230  | 6  | -0.549 | 227 |
| 17 | 20,918,246  | 20,918,432  | 5  | -0.340 | 186 |
| 17 | 20,918,246  | 20,918,432  | 5  | -0.340 | 186 |
| 4  | 171,094,497 | 171,094,719 | 8  | -0.408 | 222 |
| 4  | 171,094,497 | 171,094,719 | 8  | -0.408 | 222 |
| 3  | 146,234,643 | 146,234,787 | 5  | 0.371  | 144 |
| 3  | 156,326,796 | 156,327,497 | 13 | 0.406  | 701 |
| 3  | 156,326,796 | 156,327,497 | 13 | 0.406  | 701 |
| 3  | 156,326,796 | 156,327,497 | 13 | 0.406  | 701 |
| 3  | 156,326,796 | 156,327,497 | 13 | 0.406  | 701 |
| 3  | 156,326,796 | 156,327,497 | 13 | 0.406  | 701 |
| 3  | 156,326,796 | 156,327,497 | 13 | 0.406  | 701 |
| 2  | 61,695,657  | 61,696,249  | 6  | 0.446  | 592 |
| 2  | 61,695,657  | 61,696,249  | 6  | 0.446  | 592 |
| 7  | 131,754,601 | 131,754,725 | 6  | 0.351  | 124 |
| 7  | 131,754,601 | 131,754,725 | 6  | 0.351  | 124 |

|    |             |             |    |        |     |
|----|-------------|-------------|----|--------|-----|
| 7  | 131,754,601 | 131,754,725 | 6  | 0.351  | 124 |
| 14 | 13,939,390  | 13,939,747  | 11 | -0.480 | 357 |
| 14 | 13,939,390  | 13,939,747  | 11 | -0.480 | 357 |
| 3  | 106,195,835 | 106,195,926 | 11 | -0.347 | 91  |
| 8  | 119,646,817 | 119,647,031 | 6  | 0.349  | 214 |
| 8  | 119,646,817 | 119,647,031 | 6  | 0.349  | 214 |
| 12 | 27,416,189  | 27,416,464  | 5  | -0.381 | 275 |
| 8  | 115,452,205 | 115,452,697 | 11 | -0.374 | 492 |
| 20 | 28,107,316  | 28,107,691  | 5  | 0.435  | 375 |
| 20 | 28,107,316  | 28,107,691  | 5  | 0.435  | 375 |
| 20 | 28,107,316  | 28,107,691  | 5  | 0.435  | 375 |
| 20 | 28,107,316  | 28,107,691  | 5  | 0.435  | 375 |
| 2  | 44,238,738  | 44,239,261  | 14 | -0.579 | 523 |
| 2  | 44,238,738  | 44,239,261  | 14 | -0.579 | 523 |
| 2  | 44,238,738  | 44,239,261  | 14 | -0.579 | 523 |
| 12 | 15,707,093  | 15,707,797  | 14 | -0.454 | 704 |
| 12 | 15,764,023  | 15,764,382  | 11 | 0.525  | 359 |
| 12 | 15,790,165  | 15,790,299  | 5  | -0.387 | 134 |
| 12 | 15,790,165  | 15,790,299  | 5  | -0.387 | 134 |
| 20 | 13,999,066  | 13,999,393  | 9  | 0.447  | 327 |
| 20 | 13,999,066  | 13,999,393  | 9  | 0.447  | 327 |
| 20 | 13,615,192  | 13,615,788  | 12 | -0.394 | 596 |
| 20 | 13,615,192  | 13,615,788  | 12 | -0.394 | 596 |
| 16 | 79,495,038  | 79,495,122  | 6  | -0.442 | 84  |
| 15 | 24,229,425  | 24,229,701  | 11 | 0.378  | 276 |
| 15 | 24,355,228  | 24,355,439  | 9  | 0.362  | 211 |
| 9  | 102,117,225 | 102,117,401 | 5  | 0.349  | 176 |
| 16 | 75,913,439  | 75,913,779  | 7  | -0.485 | 340 |
| 16 | 75,912,740  | 75,912,945  | 5  | -0.406 | 205 |
| 3  | 74,824,354  | 74,825,183  | 20 | -0.369 | 829 |
| 3  | 74,828,873  | 74,829,413  | 7  | -0.359 | 540 |
| 3  | 74,824,354  | 74,825,183  | 20 | -0.369 | 829 |
| 3  | 74,828,873  | 74,829,413  | 7  | -0.359 | 540 |
| 3  | 74,824,354  | 74,825,183  | 20 | -0.369 | 829 |
| 3  | 74,824,354  | 74,825,183  | 20 | -0.369 | 829 |
| 3  | 74,824,354  | 74,825,183  | 20 | -0.369 | 829 |
| 3  | 74,824,354  | 74,825,183  | 20 | -0.369 | 829 |
| 1  | 84,804,987  | 84,805,205  | 20 | -0.336 | 218 |

|    |             |             |    |        |      |
|----|-------------|-------------|----|--------|------|
| 1  | 26,632,252  | 26,632,340  | 7  | 0.374  | 88   |
| 6  | 110,369,199 | 110,369,777 | 6  | -0.423 | 578  |
| 6  | 110,369,199 | 110,369,777 | 6  | -0.423 | 578  |
| 16 | 81,401,972  | 81,402,211  | 6  | 0.339  | 239  |
| 16 | 81,401,972  | 81,402,211  | 6  | 0.339  | 239  |
| 16 | 81,401,972  | 81,402,211  | 6  | 0.339  | 239  |
| 16 | 81,401,972  | 81,402,211  | 6  | 0.339  | 239  |
| 4  | 9,571,948   | 9,572,255   | 8  | 0.525  | 307  |
| 4  | 9,571,948   | 9,572,255   | 8  | 0.525  | 307  |
| 2  | 9,683,275   | 9,683,540   | 5  | -0.388 | 265  |
| 2  | 9,683,275   | 9,683,540   | 5  | -0.388 | 265  |
| 5  | 169,268,017 | 169,268,674 | 15 | -0.405 | 657  |
| 8  | 32,210,435  | 32,210,821  | 6  | -0.446 | 386  |
| 8  | 32,210,435  | 32,210,821  | 6  | -0.446 | 386  |
| 1  | 15,755,426  | 15,755,560  | 5  | -0.524 | 134  |
| 1  | 15,755,426  | 15,755,560  | 5  | -0.524 | 134  |
| 4  | 10,024,644  | 10,024,770  | 5  | -0.468 | 126  |
| 4  | 10,024,644  | 10,024,770  | 5  | -0.468 | 126  |
| 4  | 10,024,644  | 10,024,770  | 5  | -0.468 | 126  |
| 4  | 10,024,644  | 10,024,770  | 5  | -0.468 | 126  |
| 4  | 165,692,804 | 165,694,575 | 31 | -0.490 | 1771 |
| 16 | 54,381,850  | 54,381,868  | 10 | 0.436  | 18   |
| 16 | 54,381,850  | 54,381,868  | 10 | 0.436  | 18   |
| 10 | 82,763,325  | 82,763,338  | 6  | -0.344 | 13   |
| 10 | 82,763,325  | 82,763,338  | 6  | -0.344 | 13   |
| 10 | 82,763,325  | 82,763,338  | 6  | -0.344 | 13   |
| 10 | 82,763,325  | 82,763,338  | 6  | -0.344 | 13   |
| 10 | 82,763,325  | 82,763,338  | 6  | -0.344 | 13   |
| 10 | 82,763,325  | 82,763,338  | 6  | -0.344 | 13   |
| 10 | 82,763,325  | 82,763,338  | 6  | -0.344 | 13   |
| 10 | 82,763,325  | 82,763,338  | 6  | -0.344 | 13   |
| 19 | 52,196,706  | 52,197,193  | 6  | 0.351  | 487  |
| 19 | 52,196,706  | 52,197,193  | 6  | 0.351  | 487  |
| 19 | 52,196,706  | 52,197,193  | 6  | 0.351  | 487  |
| 12 | 15,764,023  | 15,764,382  | 11 | 0.525  | 359  |
| 18 | 3,768,667   | 3,769,240   | 9  | 0.482  | 573  |
| 4  | 125,998,194 | 125,998,479 | 5  | 0.344  | 285  |
| 4  | 125,998,194 | 125,998,479 | 5  | 0.344  | 285  |
| 4  | 125,998,194 | 125,998,479 | 5  | 0.344  | 285  |

|    |             |             |    |        |     |
|----|-------------|-------------|----|--------|-----|
| 2  | 28,673,047  | 28,673,172  | 5  | 0.339  | 125 |
| 2  | 28,673,047  | 28,673,172  | 5  | 0.339  | 125 |
| 19 | 14,329,022  | 14,329,481  | 6  | -0.545 | 459 |
| 16 | 17,385,924  | 17,386,108  | 5  | 0.445  | 184 |
| 15 | 85,308,726  | 85,308,883  | 6  | -0.364 | 157 |
| 10 | 105,374,123 | 105,374,195 | 8  | -0.346 | 72  |
| 10 | 105,374,123 | 105,374,195 | 8  | -0.346 | 72  |
| 4  | 119,369,777 | 119,369,982 | 14 | -0.396 | 205 |
| 12 | 39,448,249  | 39,448,449  | 6  | -0.452 | 200 |
| 1  | 149,750,872 | 149,750,993 | 9  | -0.458 | 121 |
| 14 | 6,356,207   | 6,356,495   | 11 | -0.362 | 288 |
| 14 | 6,356,207   | 6,356,495   | 11 | -0.362 | 288 |
| 14 | 6,356,207   | 6,356,495   | 11 | -0.362 | 288 |
| 14 | 6,356,615   | 6,356,750   | 8  | -0.426 | 135 |
| 2  | 196,341,870 | 196,341,884 | 8  | -0.400 | 14  |
| 2  | 196,341,870 | 196,341,884 | 8  | -0.400 | 14  |
| 14 | 17,244,290  | 17,244,481  | 6  | 0.497  | 191 |
| 1  | 85,488,421  | 85,488,435  | 8  | 0.492  | 14  |
| 3  | 11,927,412  | 11,927,814  | 13 | 0.411  | 402 |
| 3  | 11,926,832  | 11,927,335  | 9  | 0.402  | 503 |
| 3  | 11,926,832  | 11,927,335  | 9  | 0.402  | 503 |
| 3  | 11,927,412  | 11,927,814  | 13 | 0.411  | 402 |
| 13 | 86,843,953  | 86,844,345  | 14 | 0.385  | 392 |
| 5  | 167,653,998 | 167,654,703 | 10 | 0.338  | 705 |
| 5  | 167,653,998 | 167,654,703 | 10 | 0.338  | 705 |
| 5  | 167,653,998 | 167,654,703 | 10 | 0.338  | 705 |
| 4  | 152,223,076 | 152,223,326 | 13 | 0.371  | 250 |
| 2  | 158,544,156 | 158,544,470 | 6  | -0.337 | 314 |
| 2  | 158,544,156 | 158,544,470 | 6  | -0.337 | 314 |
| 4  | 132,723,375 | 132,723,783 | 5  | 0.396  | 408 |
| 4  | 132,723,375 | 132,723,783 | 5  | 0.396  | 408 |
| 4  | 132,723,375 | 132,723,783 | 5  | 0.396  | 408 |
| 4  | 132,723,375 | 132,723,783 | 5  | 0.396  | 408 |
| 4  | 132,723,375 | 132,723,783 | 5  | 0.396  | 408 |
| 20 | 43,225,888  | 43,226,000  | 8  | -0.379 | 112 |
| 3  | 76,043,237  | 76,043,253  | 5  | -0.366 | 16  |
| 3  | 76,043,237  | 76,043,253  | 5  | -0.366 | 16  |
| 4  | 43,446,992  | 43,447,407  | 7  | 0.361  | 415 |



|    |             |             |    |        |     |
|----|-------------|-------------|----|--------|-----|
| 15 | 106,634,572 | 106,635,098 | 15 | 0.408  | 526 |
| 15 | 106,634,572 | 106,635,098 | 15 | 0.408  | 526 |
| 15 | 106,634,572 | 106,635,098 | 15 | 0.408  | 526 |
| 2  | 43,094,592  | 43,094,640  | 5  | -0.363 | 48  |
| 2  | 43,094,592  | 43,094,640  | 5  | -0.363 | 48  |
| 5  | 160,519,056 | 160,519,506 | 8  | -0.397 | 450 |
| 5  | 145,416,806 | 145,417,028 | 5  | 0.347  | 222 |
| 5  | 145,416,806 | 145,417,028 | 5  | 0.347  | 222 |
| 3  | 7,518,937   | 7,519,003   | 7  | -0.417 | 66  |
| 3  | 7,518,937   | 7,519,003   | 7  | -0.417 | 66  |
| 1  | 13,482,975  | 13,483,125  | 7  | -0.389 | 150 |
| 1  | 13,385,349  | 13,385,499  | 8  | -0.393 | 150 |
| 9  | 105,784,405 | 105,784,477 | 6  | -0.334 | 72  |
| 9  | 105,784,405 | 105,784,477 | 6  | -0.334 | 72  |
| 11 | 73,148,688  | 73,149,325  | 8  | -0.451 | 637 |
| 11 | 73,148,688  | 73,149,325  | 8  | -0.451 | 637 |
| 11 | 73,148,688  | 73,149,325  | 8  | -0.451 | 637 |
| 10 | 109,943,346 | 109,943,368 | 10 | 0.493  | 22  |
| 19 | 25,294,221  | 25,294,233  | 7  | -0.381 | 12  |
| 19 | 25,294,221  | 25,294,233  | 7  | -0.381 | 12  |
| 19 | 25,294,221  | 25,294,233  | 7  | -0.381 | 12  |
| 19 | 25,294,221  | 25,294,233  | 7  | -0.381 | 12  |
| 13 | 32,716,102  | 32,716,112  | 5  | 0.341  | 10  |
| 19 | 49,647,060  | 49,647,070  | 6  | 0.579  | 10  |
| 5  | 106,180,308 | 106,180,496 | 6  | -0.398 | 188 |
| 5  | 106,180,308 | 106,180,496 | 6  | -0.398 | 188 |
| 8  | 48,907,712  | 48,908,091  | 14 | 0.358  | 379 |
| 4  | 9,281,121   | 9,281,523   | 6  | -0.416 | 402 |
| 12 | 7,891,573   | 7,891,813   | 5  | 0.335  | 240 |
| 12 | 1,553,097   | 1,553,639   | 7  | 0.336  | 542 |
| 12 | 1,553,097   | 1,553,639   | 7  | 0.336  | 542 |
| 8  | 127,592,365 | 127,592,890 | 10 | -0.345 | 525 |
| 1  | 190,109,264 | 190,109,698 | 5  | 0.396  | 434 |
| 1  | 190,109,264 | 190,109,698 | 5  | 0.396  | 434 |
| 1  | 190,109,264 | 190,109,698 | 5  | 0.396  | 434 |
| 1  | 190,109,264 | 190,109,698 | 5  | 0.396  | 434 |
| 19 | 27,914,152  | 27,914,162  | 6  | 0.417  | 10  |
| 19 | 27,914,152  | 27,914,162  | 6  | 0.417  | 10  |

|    |             |             |    |        |     |
|----|-------------|-------------|----|--------|-----|
| 4  | 128,382,442 | 128,382,706 | 9  | -0.342 | 264 |
| 9  | 93,099,777  | 93,100,101  | 8  | -0.445 | 324 |
| 5  | 51,222,488  | 51,222,685  | 11 | -0.477 | 197 |
| 20 | 43,615,512  | 43,615,894  | 6  | -0.450 | 382 |
| 20 | 43,615,512  | 43,615,894  | 6  | -0.450 | 382 |
| 20 | 13,116,540  | 13,116,574  | 5  | -0.367 | 34  |
| 13 | 67,547,358  | 67,547,424  | 5  | 0.355  | 66  |
| 13 | 67,547,358  | 67,547,424  | 5  | 0.355  | 66  |
| 18 | 3,690,233   | 3,690,589   | 5  | -0.589 | 356 |
| X  | 55,968,370  | 55,968,378  | 5  | 0.384  | 8   |
| 2  | 236,071,082 | 236,071,368 | 5  | 0.336  | 286 |
| 16 | 80,742,163  | 80,742,175  | 6  | 0.529  | 12  |
| 16 | 80,742,163  | 80,742,175  | 6  | 0.529  | 12  |
| 4  | 5,555,894   | 5,556,025   | 5  | 0.372  | 131 |
| 4  | 5,532,365   | 5,532,379   | 8  | 0.461  | 14  |
| 13 | 78,223,568  | 78,223,715  | 7  | 0.404  | 147 |
| 13 | 78,223,568  | 78,223,715  | 7  | 0.404  | 147 |
| 13 | 78,223,568  | 78,223,715  | 7  | 0.404  | 147 |
| 17 | 27,484,076  | 27,484,225  | 5  | -0.341 | 149 |
| 17 | 27,484,076  | 27,484,225  | 5  | -0.341 | 149 |
| 17 | 27,484,076  | 27,484,225  | 5  | -0.341 | 149 |
| 17 | 27,484,076  | 27,484,225  | 5  | -0.341 | 149 |
| 17 | 11,515,323  | 11,515,494  | 8  | -0.359 | 171 |
| 17 | 11,700,172  | 11,700,198  | 5  | -0.399 | 26  |
| 17 | 11,515,323  | 11,515,494  | 8  | -0.359 | 171 |
| 17 | 11,515,323  | 11,515,494  | 8  | -0.359 | 171 |
| 17 | 11,700,172  | 11,700,198  | 5  | -0.399 | 26  |
| 17 | 11,700,172  | 11,700,198  | 5  | -0.399 | 26  |
| 17 | 11,700,172  | 11,700,198  | 5  | -0.399 | 26  |
| 1  | 67,874,705  | 67,874,719  | 7  | 0.440  | 14  |
| 4  | 156,324,291 | 156,324,374 | 7  | -0.452 | 83  |
| 4  | 156,324,291 | 156,324,374 | 7  | -0.452 | 83  |
| 4  | 156,324,291 | 156,324,374 | 7  | -0.452 | 83  |
| 3  | 58,744,434  | 58,744,587  | 6  | -0.380 | 153 |
| 3  | 58,744,434  | 58,744,587  | 6  | -0.380 | 153 |
| 3  | 58,744,434  | 58,744,587  | 6  | -0.380 | 153 |
| 3  | 58,744,434  | 58,744,587  | 6  | -0.380 | 153 |
| 3  | 58,744,434  | 58,744,587  | 6  | -0.380 | 153 |



|    |             |             |    |        |     |
|----|-------------|-------------|----|--------|-----|
| 3  | 58,744,434  | 58,744,587  | 6  | -0.380 | 153 |
| 3  | 58,811,112  | 58,811,251  | 6  | -0.480 | 139 |
| 3  | 58,744,434  | 58,744,587  | 6  | -0.380 | 153 |
| 3  | 58,744,434  | 58,744,587  | 6  | -0.380 | 153 |
| 3  | 58,811,112  | 58,811,251  | 6  | -0.480 | 139 |
| 3  | 58,811,112  | 58,811,251  | 6  | -0.480 | 139 |
| 3  | 58,811,112  | 58,811,251  | 6  | -0.480 | 139 |
| 3  | 58,811,112  | 58,811,251  | 6  | -0.480 | 139 |
| 3  | 58,744,434  | 58,744,587  | 6  | -0.380 | 153 |
| 3  | 58,744,434  | 58,744,587  | 6  | -0.380 | 153 |
| 10 | 91,035,530  | 91,036,093  | 7  | 0.346  | 563 |
| 17 | 74,844,539  | 74,844,597  | 5  | 0.485  | 58  |
| 17 | 74,844,539  | 74,844,597  | 5  | 0.485  | 58  |
| 17 | 74,844,539  | 74,844,597  | 5  | 0.485  | 58  |
| 7  | 140,328,857 | 140,329,301 | 13 | 0.363  | 444 |
| 7  | 140,328,857 | 140,329,301 | 13 | 0.363  | 444 |
| 1  | 4,482,029   | 4,482,589   | 13 | -0.422 | 560 |
| 1  | 4,482,029   | 4,482,589   | 13 | -0.422 | 560 |
| 1  | 4,482,029   | 4,482,589   | 13 | -0.422 | 560 |
| 9  | 53,273,093  | 53,273,281  | 5  | 0.358  | 188 |
| 9  | 102,657,097 | 102,657,641 | 7  | 0.477  | 544 |
| 9  | 102,657,097 | 102,657,641 | 7  | 0.477  | 544 |
| 9  | 102,645,538 | 102,645,707 | 9  | 0.390  | 169 |
| 9  | 102,657,097 | 102,657,641 | 7  | 0.477  | 544 |
| 9  | 102,645,538 | 102,645,707 | 9  | 0.390  | 169 |
| 9  | 102,645,538 | 102,645,707 | 9  | 0.390  | 169 |
| 1  | 72,948,735  | 72,949,173  | 7  | 0.343  | 438 |
| 1  | 72,948,735  | 72,949,173  | 7  | 0.343  | 438 |
| 1  | 72,948,735  | 72,949,173  | 7  | 0.343  | 438 |
| 1  | 72,948,735  | 72,949,173  | 7  | 0.343  | 438 |
| 14 | 85,664,714  | 85,664,724  | 5  | 0.398  | 10  |
| 14 | 85,664,714  | 85,664,724  | 5  | 0.398  | 10  |
| 14 | 85,664,714  | 85,664,724  | 5  | 0.398  | 10  |
| 3  | 8,384,925   | 8,384,981   | 8  | 0.400  | 56  |
| 5  | 168,166,762 | 168,166,981 | 10 | 0.379  | 219 |
| 5  | 168,166,762 | 168,166,981 | 10 | 0.379  | 219 |
| 5  | 168,166,586 | 168,166,718 | 8  | 0.354  | 132 |
| 5  | 168,166,586 | 168,166,718 | 8  | 0.354  | 132 |

|    |             |             |   |        |     |
|----|-------------|-------------|---|--------|-----|
| 1  | 253,197,702 | 253,198,238 | 7 | -0.437 | 536 |
| 9  | 46,496,245  | 46,496,409  | 5 | 0.341  | 164 |
| 9  | 46,496,245  | 46,496,409  | 5 | 0.341  | 164 |
| 5  | 156,688,729 | 156,688,955 | 7 | 0.342  | 226 |
| 5  | 156,688,729 | 156,688,955 | 7 | 0.342  | 226 |
| 4  | 182,691,906 | 182,691,978 | 5 | -0.345 | 72  |
| 4  | 182,692,109 | 182,692,327 | 7 | -0.364 | 218 |
| 4  | 182,692,109 | 182,692,327 | 7 | -0.364 | 218 |
| 4  | 182,691,906 | 182,691,978 | 5 | -0.345 | 72  |
| 5  | 157,990,487 | 157,990,785 | 5 | 0.378  | 298 |
| 5  | 157,990,487 | 157,990,785 | 5 | 0.378  | 298 |
| 5  | 157,990,487 | 157,990,785 | 5 | 0.378  | 298 |
| 5  | 145,408,755 | 145,409,024 | 6 | 0.402  | 269 |
| 9  | 39,461,960  | 39,462,119  | 5 | -0.381 | 159 |
| 9  | 39,461,960  | 39,462,119  | 5 | -0.381 | 159 |
| 9  | 39,461,960  | 39,462,119  | 5 | -0.381 | 159 |
| 4  | 183,804,968 | 183,805,116 | 6 | 0.406  | 148 |
| 4  | 183,804,968 | 183,805,116 | 6 | 0.406  | 148 |
| 4  | 183,804,968 | 183,805,116 | 6 | 0.406  | 148 |
| 4  | 183,804,968 | 183,805,116 | 6 | 0.406  | 148 |
| 14 | 110,244,728 | 110,244,894 | 6 | -0.353 | 166 |
| 14 | 110,244,728 | 110,244,894 | 6 | -0.353 | 166 |
| 14 | 110,244,728 | 110,244,894 | 6 | -0.353 | 166 |
| 14 | 110,244,728 | 110,244,894 | 6 | -0.353 | 166 |
| 14 | 110,244,728 | 110,244,894 | 6 | -0.353 | 166 |
| 14 | 110,244,728 | 110,244,894 | 6 | -0.353 | 166 |
| 20 | 24,660,550  | 24,660,578  | 5 | 0.404  | 28  |
| 12 | 41,335,397  | 41,335,479  | 5 | -0.338 | 82  |
| 20 | 9,888,644   | 9,888,745   | 9 | 0.402  | 101 |
| 20 | 9,853,542   | 9,853,868   | 5 | 0.339  | 326 |
| 20 | 12,975,878  | 12,975,968  | 5 | -0.397 | 90  |
| 11 | 37,767,063  | 37,767,335  | 6 | -0.538 | 272 |
| 11 | 35,083,469  | 35,083,497  | 6 | -0.365 | 28  |
| 11 | 35,083,469  | 35,083,497  | 6 | -0.365 | 28  |
| 10 | 108,922,985 | 108,922,997 | 7 | 0.398  | 12  |
| 15 | 108,845,676 | 108,845,884 | 6 | -0.384 | 208 |
| 15 | 108,845,676 | 108,845,884 | 6 | -0.384 | 208 |
| 6  | 48,076,732  | 48,076,956  | 5 | -0.428 | 224 |

|    |             |             |    |        |     |
|----|-------------|-------------|----|--------|-----|
| 6  | 48,076,732  | 48,076,956  | 5  | -0.428 | 224 |
| 3  | 47,278,577  | 47,279,351  | 11 | 0.563  | 774 |
| 3  | 47,282,832  | 47,283,168  | 8  | 0.384  | 336 |
| 3  | 47,278,577  | 47,279,351  | 11 | 0.563  | 774 |
| 3  | 47,278,577  | 47,279,351  | 11 | 0.563  | 774 |
| 3  | 47,282,832  | 47,283,168  | 8  | 0.384  | 336 |
| 3  | 47,282,832  | 47,283,168  | 8  | 0.384  | 336 |
| 6  | 54,652,027  | 54,652,303  | 5  | 0.371  | 276 |
| 6  | 54,652,027  | 54,652,303  | 5  | 0.371  | 276 |
| 6  | 54,652,027  | 54,652,303  | 5  | 0.371  | 276 |
| 6  | 145,253,364 | 145,253,470 | 7  | 0.369  | 106 |
| 7  | 115,977,146 | 115,977,332 | 5  | -0.382 | 186 |
| 5  | 164,031,894 | 164,032,077 | 5  | -0.419 | 183 |
| 5  | 164,031,894 | 164,032,077 | 5  | -0.419 | 183 |
| 13 | 44,537,854  | 44,538,200  | 13 | 0.458  | 346 |
| 13 | 44,537,854  | 44,538,200  | 13 | 0.458  | 346 |
| 8  | 1,376,839   | 1,376,974   | 5  | -0.392 | 135 |
| 8  | 1,376,839   | 1,376,974   | 5  | -0.392 | 135 |
| 8  | 1,376,839   | 1,376,974   | 5  | -0.392 | 135 |
| 3  | 163,757,495 | 163,757,505 | 6  | -0.389 | 10  |
| 13 | 48,365,523  | 48,365,597  | 5  | -0.348 | 74  |
| 5  | 66,070,350  | 66,070,577  | 7  | 0.419  | 227 |
| 4  | 43,688,598  | 43,688,632  | 7  | -0.597 | 34  |
| 10 | 20,790,486  | 20,790,689  | 8  | -0.334 | 203 |
| 15 | 14,208,354  | 14,208,382  | 5  | 0.338  | 28  |
| 15 | 14,208,354  | 14,208,382  | 5  | 0.338  | 28  |
| 15 | 14,208,354  | 14,208,382  | 5  | 0.338  | 28  |
| 15 | 14,208,354  | 14,208,382  | 5  | 0.338  | 28  |
| 3  | 10,211,987  | 10,212,102  | 6  | 0.379  | 115 |
| 4  | 172,880,665 | 172,880,673 | 5  | -0.367 | 8   |
| 2  | 69,660,889  | 69,661,045  | 5  | -0.478 | 156 |
| 4  | 62,700,306  | 62,700,528  | 8  | -0.471 | 222 |
| 4  | 62,700,306  | 62,700,528  | 8  | -0.471 | 222 |
| 15 | 106,222,037 | 106,222,308 | 5  | -0.356 | 271 |
| 15 | 106,213,826 | 106,214,427 | 24 | -0.354 | 601 |
| 10 | 86,278,604  | 86,279,191  | 10 | 0.363  | 587 |
| 10 | 86,278,604  | 86,279,191  | 10 | 0.363  | 587 |
| 10 | 86,278,604  | 86,279,191  | 10 | 0.363  | 587 |

|    |             |             |    |        |     |
|----|-------------|-------------|----|--------|-----|
| 10 | 86,278,604  | 86,279,191  | 10 | 0.363  | 587 |
| 17 | 13,997,672  | 13,997,927  | 6  | -0.337 | 255 |
| 17 | 13,997,672  | 13,997,927  | 6  | -0.337 | 255 |
| 19 | 31,610,546  | 31,610,560  | 8  | 0.647  | 14  |
| 4  | 8,965,633   | 8,965,732   | 6  | -0.361 | 99  |
| 4  | 8,969,628   | 8,969,854   | 8  | -0.407 | 226 |
| 3  | 161,410,907 | 161,411,026 | 6  | -0.454 | 119 |
| 3  | 161,410,907 | 161,411,026 | 6  | -0.454 | 119 |
| 3  | 161,410,907 | 161,411,026 | 6  | -0.454 | 119 |
| 3  | 161,410,907 | 161,411,026 | 6  | -0.454 | 119 |
| 3  | 161,410,907 | 161,411,026 | 6  | -0.454 | 119 |
| 16 | 49,784,260  | 49,784,878  | 7  | 0.334  | 618 |
| 16 | 49,784,260  | 49,784,878  | 7  | 0.334  | 618 |
| 16 | 49,784,260  | 49,784,878  | 7  | 0.334  | 618 |
| 16 | 49,784,260  | 49,784,878  | 7  | 0.334  | 618 |
| 16 | 49,784,260  | 49,784,878  | 7  | 0.334  | 618 |
| 16 | 49,784,260  | 49,784,878  | 7  | 0.334  | 618 |
| 16 | 49,784,260  | 49,784,878  | 7  | 0.334  | 618 |
| 16 | 49,784,260  | 49,784,878  | 7  | 0.334  | 618 |
| 18 | 14,611,512  | 14,611,815  | 7  | 0.483  | 303 |
| 1  | 155,724,084 | 155,724,416 | 5  | -0.546 | 332 |
| 1  | 155,724,084 | 155,724,416 | 5  | -0.546 | 332 |
| 8  | 58,788,018  | 58,788,066  | 6  | 0.386  | 48  |
| 18 | 6,553,048   | 6,553,221   | 11 | -0.362 | 173 |
| 1  | 189,582,761 | 189,582,927 | 5  | 0.386  | 166 |
| 1  | 189,582,761 | 189,582,927 | 5  | 0.386  | 166 |
| 1  | 189,582,761 | 189,582,927 | 5  | 0.386  | 166 |
| 1  | 189,582,761 | 189,582,927 | 5  | 0.386  | 166 |
| 1  | 189,582,761 | 189,582,927 | 5  | 0.386  | 166 |
| 1  | 189,582,761 | 189,582,927 | 5  | 0.386  | 166 |
| 9  | 71,690,249  | 71,690,476  | 5  | 0.390  | 227 |
| 16 | 83,873,172  | 83,873,278  | 5  | 0.361  | 106 |
| 16 | 83,873,172  | 83,873,278  | 5  | 0.361  | 106 |
| 16 | 83,873,172  | 83,873,278  | 5  | 0.361  | 106 |
| 6  | 12,636,808  | 12,637,211  | 19 | -0.355 | 403 |
| 6  | 12,636,808  | 12,637,211  | 19 | -0.355 | 403 |
| 6  | 12,636,808  | 12,637,211  | 19 | -0.355 | 403 |
| 6  | 12,636,808  | 12,637,211  | 19 | -0.355 | 403 |
| 6  | 12,636,808  | 12,637,211  | 19 | -0.355 | 403 |

|    |             |             |    |        |     |
|----|-------------|-------------|----|--------|-----|
| 6  | 12,636,808  | 12,637,211  | 19 | -0.355 | 403 |
| 6  | 12,636,808  | 12,637,211  | 19 | -0.355 | 403 |
| 6  | 12,636,808  | 12,637,211  | 19 | -0.355 | 403 |
| 6  | 12,636,808  | 12,637,211  | 19 | -0.355 | 403 |
| 6  | 12,636,808  | 12,637,211  | 19 | -0.355 | 403 |
| 6  | 12,920,885  | 12,921,125  | 6  | 0.355  | 240 |
| 6  | 12,920,885  | 12,921,125  | 6  | 0.355  | 240 |
| 18 | 4,289,227   | 4,289,908   | 7  | -0.388 | 681 |
| 2  | 30,890,327  | 30,890,473  | 8  | -0.357 | 146 |
| 2  | 30,890,327  | 30,890,473  | 8  | -0.357 | 146 |
| 5  | 168,288,505 | 168,288,765 | 11 | 0.351  | 260 |
| 5  | 168,288,505 | 168,288,765 | 11 | 0.351  | 260 |
| 5  | 168,288,505 | 168,288,765 | 11 | 0.351  | 260 |
| 19 | 11,073,388  | 11,073,740  | 7  | 0.492  | 352 |
| 5  | 158,630,482 | 158,630,694 | 6  | -0.492 | 212 |
| 1  | 164,724,337 | 164,724,671 | 5  | 0.349  | 334 |
| 9  | 74,829,711  | 74,829,771  | 5  | 0.357  | 60  |
| 9  | 74,829,711  | 74,829,771  | 5  | 0.357  | 60  |
| 9  | 74,829,711  | 74,829,771  | 5  | 0.357  | 60  |
| 1  | 203,418,403 | 203,418,864 | 10 | 0.411  | 461 |
| 1  | 203,418,403 | 203,418,864 | 10 | 0.411  | 461 |
| 2  | 190,763,131 | 190,763,597 | 9  | -0.438 | 466 |
| 2  | 121,645,654 | 121,646,017 | 5  | -0.338 | 363 |
| 13 | 91,165,343  | 91,165,355  | 7  | 0.391  | 12  |
| 13 | 91,030,869  | 91,030,908  | 5  | 0.450  | 39  |
| 7  | 55,798,422  | 55,798,432  | 5  | -0.479 | 10  |
| 3  | 89,272,578  | 89,272,760  | 5  | 0.342  | 182 |
| 11 | 73,359,106  | 73,359,432  | 8  | 0.388  | 326 |
| 13 | 44,920,844  | 44,921,134  | 9  | 0.543  | 290 |
| 13 | 44,920,844  | 44,921,134  | 9  | 0.543  | 290 |
| 13 | 44,920,844  | 44,921,134  | 9  | 0.543  | 290 |
| 13 | 44,920,844  | 44,921,134  | 9  | 0.543  | 290 |
| 13 | 44,920,844  | 44,921,134  | 9  | 0.543  | 290 |
| 13 | 44,920,844  | 44,921,134  | 9  | 0.543  | 290 |
| 13 | 44,920,844  | 44,921,134  | 9  | 0.543  | 290 |
| 1  | 85,488,421  | 85,488,435  | 8  | 0.492  | 14  |
| 16 | 71,907,181  | 71,907,337  | 5  | -0.418 | 156 |
| 16 | 71,907,181  | 71,907,337  | 5  | -0.418 | 156 |

|    |             |             |    |        |     |
|----|-------------|-------------|----|--------|-----|
| 17 | 15,895,940  | 15,896,314  | 5  | -0.361 | 374 |
| 3  | 40,802,558  | 40,802,758  | 9  | -0.374 | 200 |
| 3  | 165,213,290 | 165,213,657 | 15 | 0.340  | 367 |
| 3  | 165,213,290 | 165,213,657 | 15 | 0.340  | 367 |
| 3  | 165,213,290 | 165,213,657 | 15 | 0.340  | 367 |
| 3  | 165,213,290 | 165,213,657 | 15 | 0.340  | 367 |
| 19 | 53,190,150  | 53,190,344  | 5  | 0.357  | 194 |
| 2  | 252,646,238 | 252,646,311 | 5  | 0.425  | 73  |
| 12 | 7,891,573   | 7,891,813   | 5  | 0.335  | 240 |
| 12 | 40,189,802  | 40,189,846  | 7  | -0.370 | 44  |
| 2  | 179,195,596 | 179,195,606 | 6  | -0.479 | 10  |
| 7  | 138,832,461 | 138,832,819 | 14 | -0.399 | 358 |
| 7  | 138,793,194 | 138,793,492 | 6  | -0.437 | 298 |
| 8  | 118,910,246 | 118,910,475 | 8  | 0.396  | 229 |
| 4  | 3,289,594   | 3,289,606   | 6  | 0.357  | 12  |
| 4  | 3,289,594   | 3,289,606   | 6  | 0.357  | 12  |
| 15 | 79,745,694  | 79,745,755  | 6  | -0.346 | 61  |
| 15 | 79,745,694  | 79,745,755  | 6  | -0.346 | 61  |
| 16 | 71,868,284  | 71,868,632  | 6  | 0.438  | 348 |
| 8  | 111,018,313 | 111,018,592 | 6  | 0.384  | 279 |
| 8  | 111,018,313 | 111,018,592 | 6  | 0.384  | 279 |
| 4  | 76,818,554  | 76,818,564  | 6  | 0.571  | 10  |
| 7  | 1,054,517   | 1,055,401   | 23 | -0.380 | 884 |
| 7  | 1,054,517   | 1,055,401   | 23 | -0.380 | 884 |
| 7  | 1,054,517   | 1,055,401   | 23 | -0.380 | 884 |
| 7  | 1,054,517   | 1,055,401   | 23 | -0.380 | 884 |
| 7  | 1,054,517   | 1,055,401   | 23 | -0.380 | 884 |
| 8  | 115,874,367 | 115,874,492 | 5  | -0.417 | 125 |
| 2  | 201,429,684 | 201,430,555 | 9  | -0.532 | 871 |
| 2  | 201,429,684 | 201,430,555 | 9  | -0.532 | 871 |
| 2  | 201,429,684 | 201,430,555 | 9  | -0.532 | 871 |
| 2  | 201,429,684 | 201,430,555 | 9  | -0.532 | 871 |
| 2  | 201,400,467 | 201,400,650 | 9  | -0.455 | 183 |
| 4  | 78,807,715  | 78,807,834  | 5  | -0.416 | 119 |
| 11 | 37,730,127  | 37,730,419  | 12 | 0.365  | 292 |
| 11 | 37,730,127  | 37,730,419  | 12 | 0.365  | 292 |
| 11 | 37,730,127  | 37,730,419  | 12 | 0.365  | 292 |
| 11 | 37,730,127  | 37,730,419  | 12 | 0.365  | 292 |

|    |             |             |    |        |      |
|----|-------------|-------------|----|--------|------|
| 11 | 37,730,127  | 37,730,419  | 12 | 0.365  | 292  |
| 11 | 37,730,127  | 37,730,419  | 12 | 0.365  | 292  |
| 9  | 101,473,088 | 101,473,224 | 10 | -0.375 | 136  |
| 5  | 80,598,188  | 80,598,517  | 9  | -0.441 | 329  |
| 1  | 85,505,331  | 85,505,468  | 7  | -0.404 | 137  |
| 1  | 85,505,331  | 85,505,468  | 7  | -0.404 | 137  |
| 1  | 85,505,331  | 85,505,468  | 7  | -0.404 | 137  |
| 7  | 115,977,146 | 115,977,332 | 5  | -0.382 | 186  |
| 2  | 230,696,687 | 230,696,960 | 6  | -0.505 | 273  |
| 10 | 67,050,485  | 67,050,593  | 5  | -0.367 | 108  |
| 5  | 152,236,112 | 152,236,164 | 7  | 0.349  | 52   |
| 2  | 189,040,161 | 189,040,749 | 6  | -0.465 | 588  |
| 2  | 188,866,852 | 188,869,380 | 36 | -0.491 | 2528 |
| 2  | 188,866,852 | 188,869,380 | 36 | -0.491 | 2528 |
| 2  | 189,040,161 | 189,040,749 | 6  | -0.465 | 588  |
| 1  | 90,861,887  | 90,861,945  | 5  | 0.366  | 58   |
| 1  | 90,861,887  | 90,861,945  | 5  | 0.366  | 58   |
| 1  | 90,861,887  | 90,861,945  | 5  | 0.366  | 58   |
| 10 | 45,481,755  | 45,481,820  | 7  | -0.344 | 65   |
| 10 | 45,481,755  | 45,481,820  | 7  | -0.344 | 65   |
| 9  | 46,496,245  | 46,496,409  | 5  | 0.341  | 164  |
| 19 | 29,179,428  | 29,179,455  | 5  | 0.457  | 27   |
| 13 | 48,283,546  | 48,283,871  | 5  | 0.436  | 325  |
| 16 | 10,595,689  | 10,595,942  | 5  | -0.351 | 253  |
| 17 | 12,814,806  | 12,814,977  | 6  | -0.464 | 171  |
| 3  | 3,893,373   | 3,893,718   | 6  | 0.342  | 345  |
| 3  | 553,952     | 556,044     | 63 | -0.344 | 2092 |
| 13 | 81,795,263  | 81,795,401  | 6  | 0.395  | 138  |
| 1  | 165,837,009 | 165,837,361 | 6  | 0.381  | 352  |
| 2  | 614,483     | 614,731     | 9  | -0.441 | 248  |
| 20 | 10,204,465  | 10,204,620  | 5  | -0.339 | 155  |
| 2  | 188,866,852 | 188,869,380 | 36 | -0.491 | 2528 |
| 2  | 189,040,161 | 189,040,749 | 6  | -0.465 | 588  |
| 1  | 72,948,735  | 72,949,173  | 7  | 0.343  | 438  |
| 1  | 72,948,735  | 72,949,173  | 7  | 0.343  | 438  |
| 1  | 72,948,735  | 72,949,173  | 7  | 0.343  | 438  |
| 2  | 193,309,066 | 193,309,250 | 5  | -0.347 | 184  |
| 4  | 8,965,633   | 8,965,732   | 6  | -0.361 | 99   |

|    |             |             |    |        |      |
|----|-------------|-------------|----|--------|------|
| 4  | 8,969,628   | 8,969,854   | 8  | -0.407 | 226  |
| 17 | 93,272,134  | 93,272,345  | 6  | -0.374 | 211  |
| 20 | 12,372,050  | 12,372,148  | 6  | 0.406  | 98   |
| 5  | 152,236,112 | 152,236,164 | 7  | 0.349  | 52   |
| 10 | 4,704,710   | 4,704,820   | 5  | 0.566  | 110  |
| 10 | 4,705,873   | 4,706,124   | 8  | -0.334 | 251  |
| 10 | 14,027,920  | 14,027,956  | 5  | 0.343  | 36   |
| 10 | 17,050,298  | 17,050,354  | 7  | -0.351 | 56   |
| 10 | 20,280,366  | 20,280,799  | 8  | 0.386  | 433  |
| 10 | 20,333,900  | 20,334,020  | 6  | 0.342  | 120  |
| 10 | 30,854,436  | 30,854,729  | 13 | -0.360 | 293  |
| 10 | 38,975,953  | 38,976,212  | 6  | 0.346  | 259  |
| 10 | 42,357,048  | 42,357,324  | 9  | -0.458 | 276  |
| 10 | 51,266,791  | 51,267,186  | 6  | 0.335  | 395  |
| 10 | 68,508,504  | 68,508,797  | 7  | -0.467 | 293  |
| 10 | 83,537,143  | 83,537,224  | 5  | 0.436  | 81   |
| 10 | 84,218,689  | 84,218,866  | 7  | 0.354  | 177  |
| 10 | 84,572,319  | 84,572,751  | 5  | 0.386  | 432  |
| 10 | 87,679,827  | 87,680,304  | 17 | -0.372 | 477  |
| 10 | 94,464,381  | 94,464,625  | 5  | -0.468 | 244  |
| 10 | 94,753,924  | 94,753,938  | 7  | -0.420 | 14   |
| 10 | 95,765,954  | 95,766,398  | 5  | -0.365 | 444  |
| 10 | 96,235,812  | 96,236,137  | 8  | 0.387  | 325  |
| 10 | 98,882,551  | 98,882,800  | 7  | -0.399 | 249  |
| 10 | 102,057,750 | 102,057,762 | 7  | 0.478  | 12   |
| 10 | 108,761,866 | 108,762,127 | 5  | 0.371  | 261  |
| 10 | 110,222,277 | 110,222,291 | 6  | 0.560  | 14   |
| 11 | 15,078,733  | 15,079,269  | 7  | -0.334 | 536  |
| 11 | 21,627,006  | 21,627,853  | 10 | -0.514 | 847  |
| 11 | 27,200,975  | 27,201,645  | 7  | 0.377  | 670  |
| 11 | 32,044,007  | 32,044,382  | 12 | 0.527  | 375  |
| 11 | 32,218,100  | 32,218,475  | 5  | -0.348 | 375  |
| 11 | 33,438,408  | 33,438,607  | 8  | -0.444 | 199  |
| 11 | 36,147,845  | 36,148,095  | 10 | 0.346  | 250  |
| 11 | 36,188,020  | 36,188,036  | 5  | -0.810 | 16   |
| 11 | 44,701,381  | 44,703,178  | 26 | -0.611 | 1797 |
| 11 | 53,916,032  | 53,917,466  | 31 | -0.795 | 1434 |
| 11 | 54,138,608  | 54,139,106  | 15 | -0.382 | 498  |



|    |            |            |    |        |      |
|----|------------|------------|----|--------|------|
| 11 | 57,960,499 | 57,960,836 | 18 | -0.374 | 337  |
| 11 | 59,730,874 | 59,730,958 | 6  | 0.388  | 84   |
| 11 | 64,075,522 | 64,075,822 | 11 | -0.394 | 300  |
| 11 | 79,168,357 | 79,168,733 | 10 | 0.406  | 376  |
| 11 | 80,477,979 | 80,478,349 | 15 | -0.488 | 370  |
| 11 | 82,711,654 | 82,711,749 | 5  | -0.364 | 95   |
| 11 | 84,484,438 | 84,484,457 | 5  | 0.373  | 19   |
| 12 | 6,939,295  | 6,939,420  | 12 | -0.416 | 125  |
| 12 | 12,027,972 | 12,028,149 | 7  | 0.375  | 177  |
| 12 | 12,589,463 | 12,589,515 | 6  | 0.338  | 52   |
| 12 | 12,616,297 | 12,616,305 | 5  | -0.624 | 8    |
| 12 | 12,799,771 | 12,799,789 | 7  | -0.377 | 18   |
| 12 | 13,324,819 | 13,324,829 | 5  | -0.399 | 10   |
| 12 | 20,869,570 | 20,869,988 | 5  | -0.483 | 418  |
| 12 | 21,160,431 | 21,160,925 | 5  | 0.385  | 494  |
| 12 | 27,906,180 | 27,906,267 | 5  | 0.532  | 87   |
| 12 | 30,100,709 | 30,101,131 | 17 | -0.541 | 422  |
| 12 | 32,485,715 | 32,486,328 | 26 | -0.371 | 613  |
| 12 | 34,838,681 | 34,838,925 | 10 | 0.372  | 244  |
| 12 | 39,020,761 | 39,021,009 | 7  | -0.334 | 248  |
| 12 | 39,387,774 | 39,387,826 | 8  | -0.415 | 52   |
| 12 | 40,487,144 | 40,487,154 | 5  | -0.449 | 10   |
| 12 | 40,916,781 | 40,917,138 | 8  | 0.372  | 357  |
| 12 | 41,319,554 | 41,319,856 | 10 | -0.469 | 302  |
| 12 | 41,615,388 | 41,615,640 | 7  | -0.429 | 252  |
| 12 | 44,425,489 | 44,425,652 | 6  | 0.335  | 163  |
| 12 | 44,451,273 | 44,451,455 | 8  | 0.439  | 182  |
| 12 | 44,483,412 | 44,483,822 | 10 | -0.432 | 410  |
| 12 | 44,868,397 | 44,868,430 | 7  | -0.340 | 33   |
| 13 | 19,229,685 | 19,231,221 | 28 | -0.379 | 1536 |
| 13 | 31,484,465 | 31,484,580 | 6  | -0.345 | 115  |
| 13 | 33,369,484 | 33,369,742 | 5  | 0.453  | 258  |
| 13 | 41,259,346 | 41,259,386 | 8  | 0.379  | 40   |
| 13 | 45,143,860 | 45,143,954 | 5  | 0.391  | 94   |
| 13 | 47,059,752 | 47,060,075 | 11 | -0.378 | 323  |
| 13 | 48,702,882 | 48,703,649 | 11 | -0.352 | 767  |
| 13 | 55,368,926 | 55,369,197 | 5  | 0.395  | 271  |
| 13 | 69,744,528 | 69,744,812 | 13 | 0.546  | 284  |

|    |             |             |    |        |     |
|----|-------------|-------------|----|--------|-----|
| 13 | 70,083,675  | 70,084,459  | 11 | 0.547  | 784 |
| 13 | 76,909,765  | 76,909,785  | 6  | 0.398  | 20  |
| 13 | 80,055,156  | 80,055,258  | 5  | 0.367  | 102 |
| 13 | 88,389,109  | 88,389,927  | 9  | -0.404 | 818 |
| 13 | 95,067,019  | 95,067,118  | 5  | -0.378 | 99  |
| 13 | 104,927,224 | 104,927,434 | 5  | 0.346  | 210 |
| 13 | 105,199,049 | 105,199,643 | 6  | -0.384 | 594 |
| 14 | 5,264,048   | 5,264,774   | 16 | -0.397 | 726 |
| 14 | 8,848,826   | 8,849,166   | 5  | 0.361  | 340 |
| 14 | 8,872,116   | 8,872,822   | 10 | 0.425  | 706 |
| 14 | 13,562,332  | 13,562,646  | 5  | -0.362 | 314 |
| 14 | 14,102,188  | 14,102,200  | 7  | 0.818  | 12  |
| 14 | 14,711,019  | 14,711,031  | 5  | -0.678 | 12  |
| 14 | 16,717,433  | 16,717,856  | 6  | 0.340  | 423 |
| 14 | 16,816,996  | 16,817,170  | 7  | 0.389  | 174 |
| 14 | 17,107,153  | 17,107,275  | 7  | -0.367 | 122 |
| 14 | 17,107,283  | 17,107,407  | 9  | -0.406 | 124 |
| 14 | 17,701,035  | 17,701,421  | 18 | -0.603 | 386 |
| 14 | 17,931,577  | 17,931,585  | 5  | 0.355  | 8   |
| 14 | 20,865,764  | 20,865,952  | 8  | 0.394  | 188 |
| 14 | 21,367,134  | 21,367,540  | 14 | -0.548 | 406 |
| 14 | 24,261,664  | 24,262,226  | 9  | -0.580 | 562 |
| 14 | 26,833,884  | 26,834,167  | 5  | -0.911 | 283 |
| 14 | 61,805,958  | 61,806,157  | 8  | -0.394 | 199 |
| 14 | 62,352,722  | 62,353,082  | 10 | -0.370 | 360 |
| 14 | 63,661,940  | 63,662,185  | 5  | 0.470  | 245 |
| 14 | 86,083,003  | 86,083,377  | 13 | -0.344 | 374 |
| 14 | 86,128,204  | 86,128,572  | 12 | -0.425 | 368 |
| 14 | 86,435,883  | 86,435,897  | 7  | 0.591  | 14  |
| 14 | 88,296,583  | 88,296,906  | 6  | -0.376 | 323 |
| 14 | 88,456,467  | 88,457,301  | 9  | -0.368 | 834 |
| 14 | 89,443,242  | 89,443,380  | 6  | -0.450 | 138 |
| 14 | 101,655,758 | 101,656,269 | 6  | -0.468 | 511 |
| 14 | 108,176,127 | 108,176,225 | 7  | -0.339 | 98  |
| 15 | 5,869,135   | 5,869,804   | 7  | 0.339  | 669 |
| 15 | 8,850,693   | 8,850,787   | 5  | 0.391  | 94  |
| 15 | 15,142,740  | 15,142,755  | 6  | 0.394  | 15  |
| 15 | 18,456,178  | 18,456,535  | 6  | -0.494 | 357 |

|    |            |            |    |        |     |
|----|------------|------------|----|--------|-----|
| 15 | 21,572,516 | 21,572,943 | 6  | 0.353  | 427 |
| 15 | 22,824,298 | 22,824,989 | 20 | -0.380 | 691 |
| 15 | 23,313,384 | 23,313,502 | 6  | -0.340 | 118 |
| 15 | 24,595,187 | 24,595,329 | 9  | 0.356  | 142 |
| 15 | 27,300,849 | 27,301,185 | 29 | -0.427 | 336 |
| 15 | 42,365,123 | 42,365,285 | 10 | 0.408  | 162 |
| 15 | 44,744,991 | 44,745,001 | 6  | 0.340  | 10  |
| 15 | 55,987,460 | 55,987,529 | 5  | -0.358 | 69  |
| 15 | 56,743,948 | 56,744,265 | 12 | -0.357 | 317 |
| 15 | 57,758,396 | 57,758,780 | 13 | 0.365  | 384 |
| 15 | 58,094,873 | 58,094,883 | 5  | -0.525 | 10  |
| 15 | 72,760,851 | 72,760,872 | 6  | -0.465 | 21  |
| 15 | 77,335,380 | 77,335,962 | 8  | 0.371  | 582 |
| 15 | 81,111,332 | 81,111,610 | 5  | -0.380 | 278 |
| 15 | 84,304,359 | 84,304,586 | 7  | -0.411 | 227 |
| 15 | 88,029,688 | 88,029,738 | 5  | 0.463  | 50  |
| 15 | 93,841,409 | 93,841,786 | 15 | -0.553 | 377 |
| 16 | 7,149,404  | 7,149,414  | 6  | 0.398  | 10  |
| 16 | 7,598,049  | 7,598,360  | 9  | -0.339 | 311 |
| 16 | 7,598,461  | 7,598,995  | 18 | -0.412 | 534 |
| 16 | 8,151,034  | 8,151,253  | 5  | 0.340  | 219 |
| 16 | 9,530,413  | 9,530,648  | 6  | -0.360 | 235 |
| 16 | 11,630,080 | 11,630,161 | 5  | -0.457 | 81  |
| 16 | 18,685,521 | 18,685,789 | 5  | -0.399 | 268 |
| 16 | 48,001,588 | 48,001,848 | 6  | 0.365  | 260 |
| 16 | 60,244,096 | 60,244,459 | 12 | 0.446  | 363 |
| 16 | 61,736,320 | 61,737,309 | 13 | 0.391  | 989 |
| 16 | 63,650,013 | 63,650,447 | 9  | -0.397 | 434 |
| 16 | 76,304,525 | 76,304,591 | 7  | 0.376  | 66  |
| 16 | 79,453,377 | 79,454,242 | 16 | 0.373  | 865 |
| 16 | 80,610,801 | 80,611,175 | 6  | -0.357 | 374 |
| 17 | 1,242,459  | 1,242,752  | 8  | -0.345 | 293 |
| 17 | 1,557,714  | 1,557,730  | 9  | 0.541  | 16  |
| 17 | 12,122,893 | 12,123,384 | 9  | -0.353 | 491 |
| 17 | 13,124,225 | 13,124,237 | 7  | -0.596 | 12  |
| 17 | 13,947,230 | 13,947,377 | 8  | -0.371 | 147 |
| 17 | 14,266,533 | 14,266,705 | 10 | 0.456  | 172 |
| 17 | 19,823,963 | 19,824,163 | 8  | -0.375 | 200 |

|    |            |            |    |        |     |
|----|------------|------------|----|--------|-----|
| 17 | 26,821,021 | 26,821,080 | 5  | 0.358  | 59  |
| 17 | 58,993,622 | 58,993,876 | 7  | -0.785 | 254 |
| 17 | 72,627,642 | 72,627,825 | 5  | 0.337  | 183 |
| 17 | 75,206,219 | 75,206,306 | 6  | 0.376  | 87  |
| 17 | 79,063,217 | 79,063,229 | 7  | 0.505  | 12  |
| 17 | 81,236,769 | 81,236,777 | 5  | 0.549  | 8   |
| 17 | 81,418,722 | 81,418,895 | 5  | 0.391  | 173 |
| 17 | 83,795,869 | 83,796,031 | 7  | 0.385  | 162 |
| 17 | 83,934,322 | 83,934,693 | 12 | -0.343 | 371 |
| 17 | 85,778,403 | 85,778,473 | 11 | -0.561 | 70  |
| 17 | 94,501,309 | 94,502,043 | 9  | 0.375  | 734 |
| 17 | 96,381,883 | 96,381,973 | 5  | -0.440 | 90  |
| 18 | 3,782,949  | 3,783,278  | 5  | -0.370 | 329 |
| 18 | 4,917,207  | 4,917,554  | 28 | -0.456 | 347 |
| 18 | 7,849,957  | 7,850,135  | 9  | -0.579 | 178 |
| 18 | 12,232,712 | 12,233,066 | 9  | -0.350 | 354 |
| 18 | 14,833,566 | 14,834,032 | 5  | 0.423  | 466 |
| 18 | 61,491,059 | 61,491,396 | 7  | -0.365 | 337 |
| 18 | 66,411,741 | 66,412,317 | 19 | -0.441 | 576 |
| 18 | 67,276,918 | 67,277,191 | 8  | -0.510 | 273 |
| 18 | 71,065,359 | 71,065,604 | 7  | -0.494 | 245 |
| 18 | 79,319,839 | 79,320,044 | 5  | -0.377 | 205 |
| 18 | 79,328,188 | 79,328,210 | 10 | 0.415  | 22  |
| 18 | 79,537,672 | 79,538,013 | 15 | -0.405 | 341 |
| 18 | 80,057,747 | 80,058,442 | 12 | -0.436 | 695 |
| 18 | 80,287,471 | 80,287,763 | 6  | 0.363  | 292 |
| 19 | 9,534,677  | 9,535,007  | 11 | -0.361 | 330 |
| 19 | 9,601,004  | 9,601,594  | 11 | 0.412  | 590 |
| 19 | 9,601,995  | 9,602,372  | 8  | 0.470  | 377 |
| 19 | 9,658,005  | 9,658,053  | 5  | -0.359 | 48  |
| 19 | 10,947,815 | 10,948,338 | 7  | -0.383 | 523 |
| 19 | 14,393,360 | 14,393,522 | 6  | -0.392 | 162 |
| 19 | 16,123,980 | 16,124,086 | 6  | 0.395  | 106 |
| 19 | 28,552,417 | 28,552,691 | 5  | 0.388  | 274 |
| 19 | 31,186,730 | 31,186,883 | 5  | 0.392  | 153 |
| 19 | 31,259,974 | 31,260,020 | 5  | 0.409  | 46  |
| 19 | 51,166,797 | 51,166,881 | 7  | -0.368 | 84  |
| 19 | 53,062,836 | 53,062,972 | 5  | -0.494 | 136 |

|    |             |             |    |        |      |
|----|-------------|-------------|----|--------|------|
| 19 | 54,469,315  | 54,470,018  | 18 | 0.365  | 703  |
| 19 | 55,536,781  | 55,537,070  | 10 | 0.415  | 289  |
| 19 | 56,794,214  | 56,794,321  | 7  | -0.340 | 107  |
| 1  | 3,545,143   | 3,545,197   | 5  | 0.368  | 54   |
| 1  | 16,183,742  | 16,183,875  | 6  | 0.356  | 133  |
| 1  | 23,871,506  | 23,871,728  | 13 | -0.344 | 222  |
| 1  | 29,503,064  | 29,503,322  | 5  | 0.349  | 258  |
| 1  | 29,687,833  | 29,688,292  | 18 | -0.414 | 459  |
| 1  | 32,562,798  | 32,562,965  | 5  | -0.876 | 167  |
| 1  | 33,608,227  | 33,608,305  | 5  | 0.338  | 78   |
| 1  | 41,995,038  | 41,995,219  | 8  | 0.357  | 181  |
| 1  | 43,138,772  | 43,139,161  | 10 | -0.372 | 389  |
| 1  | 44,423,113  | 44,423,149  | 9  | -0.404 | 36   |
| 1  | 47,450,193  | 47,450,467  | 6  | 0.378  | 274  |
| 1  | 48,693,899  | 48,694,020  | 5  | 0.418  | 121  |
| 1  | 57,633,053  | 57,633,130  | 6  | -0.622 | 77   |
| 1  | 68,921,090  | 68,921,620  | 6  | -0.817 | 530  |
| 1  | 73,359,669  | 73,359,894  | 6  | 0.342  | 225  |
| 1  | 86,771,899  | 86,772,247  | 8  | 0.432  | 348  |
| 1  | 90,559,345  | 90,559,377  | 6  | -0.517 | 32   |
| 1  | 90,920,533  | 90,920,599  | 5  | -0.394 | 66   |
| 1  | 109,295,714 | 109,296,091 | 7  | -0.490 | 377  |
| 1  | 113,685,199 | 113,685,474 | 5  | 0.334  | 275  |
| 1  | 122,387,400 | 122,387,744 | 5  | 0.475  | 344  |
| 1  | 123,029,087 | 123,029,330 | 6  | 0.356  | 243  |
| 1  | 135,917,173 | 135,917,281 | 6  | -0.337 | 108  |
| 1  | 135,960,566 | 135,961,604 | 13 | -0.421 | 1038 |
| 1  | 136,748,500 | 136,749,205 | 9  | 0.398  | 705  |
| 1  | 137,988,208 | 137,988,275 | 8  | -0.499 | 67   |
| 1  | 141,967,317 | 141,967,415 | 5  | -0.867 | 98   |
| 1  | 145,329,382 | 145,329,505 | 6  | -0.463 | 123  |
| 1  | 155,558,438 | 155,558,741 | 5  | -0.341 | 303  |
| 1  | 160,556,558 | 160,556,870 | 5  | 0.346  | 312  |
| 1  | 161,880,578 | 161,881,039 | 5  | -0.486 | 461  |
| 1  | 161,905,186 | 161,905,622 | 7  | -0.431 | 436  |
| 1  | 166,770,296 | 166,770,616 | 10 | -0.362 | 320  |
| 1  | 169,571,608 | 169,571,628 | 6  | -0.388 | 20   |
| 1  | 176,824,197 | 176,824,278 | 7  | -0.354 | 81   |

|    |             |             |    |        |     |
|----|-------------|-------------|----|--------|-----|
| 1  | 182,588,194 | 182,588,206 | 7  | 0.397  | 12  |
| 1  | 185,305,067 | 185,305,208 | 5  | -0.349 | 141 |
| 1  | 185,446,433 | 185,446,634 | 5  | -0.562 | 201 |
| 1  | 188,209,055 | 188,209,172 | 9  | 0.361  | 117 |
| 1  | 190,728,899 | 190,729,117 | 12 | -0.416 | 218 |
| 1  | 195,152,377 | 195,152,459 | 6  | 0.376  | 82  |
| 1  | 198,618,353 | 198,618,534 | 6  | 0.349  | 181 |
| 1  | 201,137,065 | 201,137,097 | 10 | 0.353  | 32  |
| 1  | 212,829,112 | 212,829,340 | 7  | 0.530  | 228 |
| 1  | 217,848,881 | 217,849,198 | 9  | 0.352  | 317 |
| 1  | 218,616,243 | 218,616,253 | 5  | 0.454  | 10  |
| 1  | 219,305,420 | 219,305,524 | 5  | 0.349  | 104 |
| 1  | 224,808,808 | 224,808,837 | 10 | -0.366 | 29  |
| 1  | 230,436,180 | 230,436,641 | 5  | -0.365 | 461 |
| 1  | 231,693,413 | 231,693,429 | 7  | 0.362  | 16  |
| 1  | 231,866,213 | 231,866,746 | 9  | 0.342  | 533 |
| 1  | 232,327,859 | 232,327,885 | 11 | 0.395  | 26  |
| 1  | 232,365,692 | 232,365,882 | 6  | -0.571 | 190 |
| 1  | 233,044,343 | 233,044,706 | 8  | -0.362 | 363 |
| 1  | 237,307,573 | 237,307,779 | 5  | 0.348  | 206 |
| 1  | 246,185,028 | 246,185,044 | 5  | 0.652  | 16  |
| 1  | 249,379,076 | 249,379,164 | 5  | 0.364  | 88  |
| 1  | 251,747,451 | 251,747,840 | 10 | 0.384  | 389 |
| 1  | 257,458,894 | 257,459,061 | 7  | -0.374 | 167 |
| 20 | 10,305,066  | 10,305,230  | 8  | 0.464  | 164 |
| 20 | 11,113,699  | 11,114,046  | 9  | -0.398 | 347 |
| 20 | 11,796,746  | 11,796,829  | 7  | -0.430 | 83  |
| 20 | 12,008,483  | 12,008,499  | 9  | -0.383 | 16  |
| 20 | 13,170,234  | 13,170,435  | 11 | 0.340  | 201 |
| 20 | 13,177,762  | 13,177,843  | 5  | -0.461 | 81  |
| 20 | 15,016,421  | 15,016,433  | 6  | -0.369 | 12  |
| 20 | 22,575,092  | 22,575,100  | 5  | 0.413  | 8   |
| 20 | 42,541,167  | 42,541,305  | 11 | -0.539 | 138 |
| 20 | 42,610,377  | 42,610,827  | 5  | -0.557 | 450 |
| 20 | 42,611,428  | 42,612,124  | 7  | -0.388 | 696 |
| 20 | 42,729,223  | 42,729,264  | 7  | 0.360  | 41  |
| 20 | 47,205,245  | 47,205,641  | 10 | -0.455 | 396 |
| 20 | 48,506,882  | 48,507,062  | 10 | 0.340  | 180 |

|   |             |             |    |        |      |
|---|-------------|-------------|----|--------|------|
| 2 | 56,550      | 56,734      | 6  | -0.976 | 184  |
| 2 | 1,398,583   | 1,398,907   | 7  | 0.426  | 324  |
| 2 | 1,417,736   | 1,418,062   | 9  | 0.394  | 326  |
| 2 | 1,422,574   | 1,423,010   | 7  | 0.347  | 436  |
| 2 | 9,976,063   | 9,976,336   | 10 | 0.457  | 273  |
| 2 | 27,201,383  | 27,201,609  | 5  | 0.397  | 226  |
| 2 | 30,855,651  | 30,855,663  | 6  | -0.353 | 12   |
| 2 | 35,456,503  | 35,456,973  | 22 | 0.339  | 470  |
| 2 | 37,855,849  | 37,855,958  | 5  | 0.335  | 109  |
| 2 | 38,061,801  | 38,062,086  | 10 | 0.692  | 285  |
| 2 | 38,115,342  | 38,115,356  | 8  | 0.484  | 14   |
| 2 | 39,235,842  | 39,235,854  | 5  | -0.450 | 12   |
| 2 | 41,108,579  | 41,108,683  | 6  | -0.446 | 104  |
| 2 | 41,673,646  | 41,673,704  | 5  | 0.346  | 58   |
| 2 | 43,215,242  | 43,215,437  | 9  | -0.336 | 195  |
| 2 | 43,544,068  | 43,544,517  | 5  | -0.464 | 449  |
| 2 | 43,939,396  | 43,939,968  | 8  | -0.372 | 572  |
| 2 | 51,914,492  | 51,915,168  | 25 | -0.730 | 676  |
| 2 | 52,092,205  | 52,092,562  | 11 | -0.361 | 357  |
| 2 | 52,243,597  | 52,245,294  | 19 | -0.557 | 1697 |
| 2 | 61,992,979  | 61,993,150  | 5  | -0.350 | 171  |
| 2 | 78,257,140  | 78,257,317  | 5  | -0.377 | 177  |
| 2 | 79,234,925  | 79,234,933  | 5  | -0.423 | 8    |
| 2 | 95,084,230  | 95,084,564  | 8  | -0.410 | 334  |
| 2 | 105,636,120 | 105,636,252 | 9  | -0.372 | 132  |
| 2 | 108,272,982 | 108,273,415 | 6  | -0.335 | 433  |
| 2 | 115,511,994 | 115,512,568 | 9  | 0.346  | 574  |
| 2 | 116,343,828 | 116,343,905 | 8  | -0.363 | 77   |
| 2 | 116,375,575 | 116,375,637 | 8  | -0.346 | 62   |
| 2 | 116,712,918 | 116,713,053 | 8  | -0.541 | 135  |
| 2 | 116,713,108 | 116,713,412 | 10 | -0.461 | 304  |
| 2 | 123,692,625 | 123,692,663 | 5  | 0.392  | 38   |
| 2 | 128,066,725 | 128,067,333 | 8  | -0.565 | 608  |
| 2 | 139,848,274 | 139,848,613 | 6  | 0.374  | 339  |
| 2 | 141,230,225 | 141,230,341 | 7  | 0.382  | 116  |
| 2 | 143,978,899 | 143,979,077 | 5  | -0.382 | 178  |
| 2 | 148,133,691 | 148,133,853 | 7  | 0.338  | 162  |
| 2 | 157,126,015 | 157,126,111 | 5  | -0.448 | 96   |

|   |             |             |    |        |      |
|---|-------------|-------------|----|--------|------|
| 2 | 158,660,017 | 158,660,357 | 10 | -0.431 | 340  |
| 2 | 175,522,666 | 175,522,678 | 7  | -0.414 | 12   |
| 2 | 178,932,423 | 178,932,501 | 8  | 0.334  | 78   |
| 2 | 180,346,831 | 180,347,515 | 8  | -0.369 | 684  |
| 2 | 186,902,654 | 186,902,960 | 8  | -0.903 | 306  |
| 2 | 190,871,855 | 190,872,024 | 5  | -0.433 | 169  |
| 2 | 191,064,065 | 191,064,367 | 8  | 0.355  | 302  |
| 2 | 191,221,265 | 191,221,559 | 14 | -0.367 | 294  |
| 2 | 194,148,517 | 194,148,623 | 5  | 0.378  | 106  |
| 2 | 195,756,917 | 195,757,044 | 6  | 0.369  | 127  |
| 2 | 195,818,334 | 195,818,485 | 5  | -0.462 | 151  |
| 2 | 196,575,140 | 196,575,390 | 5  | 0.361  | 250  |
| 2 | 211,523,568 | 211,523,774 | 6  | -0.747 | 206  |
| 2 | 214,093,970 | 214,094,330 | 7  | -0.361 | 360  |
| 2 | 221,948,929 | 221,949,202 | 7  | -0.352 | 273  |
| 2 | 227,102,981 | 227,103,088 | 5  | 0.406  | 107  |
| 2 | 227,794,362 | 227,794,391 | 5  | 0.387  | 29   |
| 2 | 227,988,449 | 227,988,574 | 5  | -0.347 | 125  |
| 2 | 230,341,162 | 230,341,294 | 6  | -0.355 | 132  |
| 2 | 231,590,502 | 231,591,567 | 17 | -0.344 | 1065 |
| 2 | 233,242,743 | 233,242,812 | 6  | -0.404 | 69   |
| 2 | 234,986,842 | 234,987,115 | 6  | 0.361  | 273  |
| 2 | 236,138,691 | 236,139,021 | 6  | 0.376  | 330  |
| 2 | 239,217,876 | 239,218,547 | 7  | -0.466 | 671  |
| 2 | 251,410,667 | 251,410,677 | 5  | 0.337  | 10   |
| 2 | 252,537,683 | 252,538,185 | 6  | 0.396  | 502  |
| 2 | 256,700,368 | 256,700,862 | 9  | -0.337 | 494  |
| 3 | 12,487,802  | 12,487,908  | 7  | -0.354 | 106  |
| 3 | 12,993,798  | 12,994,104  | 28 | -0.339 | 306  |
| 3 | 14,630,385  | 14,630,860  | 13 | 0.382  | 475  |
| 3 | 23,726,828  | 23,727,332  | 10 | -0.594 | 504  |
| 3 | 29,585,856  | 29,586,479  | 9  | 0.399  | 623  |
| 3 | 32,151,284  | 32,151,651  | 5  | 0.363  | 367  |
| 3 | 34,306,039  | 34,306,243  | 6  | -0.422 | 204  |
| 3 | 46,463,161  | 46,463,981  | 9  | 0.382  | 820  |
| 3 | 47,194,698  | 47,195,039  | 6  | 0.364  | 341  |
| 3 | 50,213,939  | 50,215,260  | 15 | -0.570 | 1321 |
| 3 | 57,799,122  | 57,799,141  | 5  | -0.396 | 19   |



|   |             |             |    |        |      |
|---|-------------|-------------|----|--------|------|
| 3 | 64,084,076  | 64,084,383  | 6  | -0.702 | 307  |
| 3 | 64,086,232  | 64,086,370  | 6  | -0.344 | 138  |
| 3 | 67,183,130  | 67,183,201  | 8  | 0.337  | 71   |
| 3 | 67,941,667  | 67,941,953  | 6  | 0.579  | 286  |
| 3 | 69,154,149  | 69,154,175  | 8  | -0.667 | 26   |
| 3 | 72,442,837  | 72,443,281  | 5  | -0.360 | 444  |
| 3 | 76,929,695  | 76,929,810  | 5  | 0.582  | 115  |
| 3 | 77,083,124  | 77,083,146  | 6  | 0.339  | 22   |
| 3 | 93,674,356  | 93,674,827  | 5  | -0.391 | 471  |
| 3 | 93,694,490  | 93,694,588  | 5  | -0.438 | 98   |
| 3 | 96,435,433  | 96,435,505  | 12 | -0.520 | 72   |
| 3 | 104,118,099 | 104,118,109 | 6  | 0.501  | 10   |
| 3 | 114,616,843 | 114,616,980 | 5  | 0.392  | 137  |
| 3 | 117,352,061 | 117,352,272 | 17 | -0.402 | 211  |
| 3 | 117,521,016 | 117,521,200 | 5  | -0.370 | 184  |
| 3 | 119,574,254 | 119,574,918 | 9  | -0.515 | 664  |
| 3 | 120,089,243 | 120,089,379 | 7  | 0.387  | 136  |
| 3 | 126,276,367 | 126,276,570 | 5  | 0.347  | 203  |
| 3 | 132,344,167 | 132,344,434 | 8  | 0.362  | 267  |
| 3 | 134,300,110 | 134,300,300 | 9  | -0.377 | 190  |
| 3 | 137,267,374 | 137,267,689 | 5  | 0.384  | 315  |
| 3 | 140,335,458 | 140,335,494 | 12 | 0.483  | 36   |
| 3 | 154,337,007 | 154,337,738 | 15 | 0.352  | 731  |
| 3 | 156,721,483 | 156,722,103 | 8  | 0.341  | 620  |
| 3 | 160,619,387 | 160,619,710 | 10 | 0.402  | 323  |
| 3 | 161,729,565 | 161,729,636 | 6  | 0.366  | 71   |
| 3 | 162,064,561 | 162,064,761 | 5  | -0.507 | 200  |
| 3 | 162,091,892 | 162,091,906 | 7  | -0.374 | 14   |
| 3 | 163,836,387 | 163,837,926 | 25 | -0.697 | 1539 |
| 3 | 165,156,364 | 165,156,698 | 6  | -0.343 | 334  |
| 3 | 167,981,130 | 167,981,317 | 5  | -0.376 | 187  |
| 3 | 168,174,696 | 168,174,743 | 6  | -0.364 | 47   |
| 3 | 169,383,448 | 169,383,724 | 5  | 0.401  | 276  |
| 3 | 169,510,251 | 169,510,691 | 5  | 0.387  | 440  |
| 4 | 3,935,417   | 3,935,628   | 5  | -0.406 | 211  |
| 4 | 5,458,426   | 5,458,809   | 5  | 0.377  | 383  |
| 4 | 6,602,168   | 6,602,453   | 6  | -0.457 | 285  |
| 4 | 29,239,435  | 29,239,475  | 11 | 0.342  | 40   |

|   |             |             |    |        |      |
|---|-------------|-------------|----|--------|------|
| 4 | 53,410,271  | 53,410,669  | 5  | -0.391 | 398  |
| 4 | 55,767,468  | 55,767,614  | 9  | 0.385  | 146  |
| 4 | 61,786,033  | 61,787,332  | 24 | -0.492 | 1299 |
| 4 | 72,734,940  | 72,735,530  | 9  | -0.371 | 590  |
| 4 | 75,488,281  | 75,488,849  | 8  | -0.432 | 568  |
| 4 | 79,854,309  | 79,854,508  | 6  | -0.418 | 199  |
| 4 | 85,219,080  | 85,219,435  | 9  | -0.371 | 355  |
| 4 | 86,942,587  | 86,942,727  | 7  | -0.407 | 140  |
| 4 | 90,102,528  | 90,102,945  | 5  | -0.429 | 417  |
| 4 | 111,866,079 | 111,866,103 | 6  | 0.353  | 24   |
| 4 | 116,151,441 | 116,151,580 | 12 | -0.569 | 139  |
| 4 | 117,691,037 | 117,691,315 | 8  | -0.381 | 278  |
| 4 | 117,886,680 | 117,887,020 | 6  | 0.342  | 340  |
| 4 | 121,517,259 | 121,517,269 | 5  | -0.352 | 10   |
| 4 | 126,400,182 | 126,400,194 | 6  | 0.337  | 12   |
| 4 | 128,706,610 | 128,706,631 | 7  | -0.450 | 21   |
| 4 | 130,650,847 | 130,651,235 | 5  | -0.418 | 388  |
| 4 | 134,971,817 | 134,972,029 | 7  | 0.457  | 212  |
| 4 | 140,992,173 | 140,992,289 | 5  | -0.529 | 116  |
| 4 | 160,549,806 | 160,550,357 | 12 | 0.354  | 551  |
| 4 | 172,691,852 | 172,691,862 | 5  | -0.428 | 10   |
| 4 | 182,402,686 | 182,402,696 | 5  | 0.501  | 10   |
| 4 | 182,757,073 | 182,757,548 | 7  | 0.352  | 475  |
| 4 | 184,007,716 | 184,007,732 | 5  | 0.371  | 16   |
| 5 | 5,440,468   | 5,440,584   | 5  | 0.344  | 116  |
| 5 | 26,924,860  | 26,924,911  | 5  | -0.434 | 51   |
| 5 | 36,022,764  | 36,023,361  | 7  | -0.597 | 597  |
| 5 | 36,077,115  | 36,077,268  | 5  | -0.507 | 153  |
| 5 | 36,247,948  | 36,248,255  | 6  | -0.620 | 307  |
| 5 | 36,278,391  | 36,278,435  | 7  | -0.345 | 44   |
| 5 | 39,451,332  | 39,451,493  | 7  | -0.574 | 161  |
| 5 | 57,654,069  | 57,654,187  | 8  | -0.388 | 118  |
| 5 | 58,275,643  | 58,275,834  | 6  | -0.560 | 191  |
| 5 | 67,318,448  | 67,318,726  | 9  | -0.462 | 278  |
| 5 | 73,779,818  | 73,779,828  | 6  | 0.436  | 10   |
| 5 | 79,777,986  | 79,778,245  | 8  | 0.510  | 259  |
| 5 | 79,798,372  | 79,798,529  | 5  | -0.392 | 157  |
| 5 | 83,361,352  | 83,361,594  | 10 | -0.864 | 242  |

|   |             |             |    |        |     |
|---|-------------|-------------|----|--------|-----|
| 5 | 88,728,693  | 88,729,130  | 6  | -0.410 | 437 |
| 5 | 96,950,610  | 96,950,819  | 5  | 0.342  | 209 |
| 5 | 100,677,585 | 100,677,783 | 5  | 0.373  | 198 |
| 5 | 102,656,488 | 102,656,549 | 5  | -1.000 | 61  |
| 5 | 102,707,853 | 102,707,977 | 5  | -0.350 | 124 |
| 5 | 102,733,734 | 102,733,878 | 9  | -0.586 | 144 |
| 5 | 105,613,567 | 105,613,772 | 8  | -0.402 | 205 |
| 5 | 105,746,565 | 105,746,988 | 6  | 0.396  | 423 |
| 5 | 106,633,031 | 106,633,125 | 6  | -0.339 | 94  |
| 5 | 108,019,292 | 108,019,646 | 5  | -0.804 | 354 |
| 5 | 113,641,785 | 113,641,902 | 5  | -0.399 | 117 |
| 5 | 115,246,541 | 115,246,741 | 6  | -0.452 | 200 |
| 5 | 117,567,960 | 117,568,285 | 6  | -0.393 | 325 |
| 5 | 118,070,742 | 118,070,938 | 5  | -0.568 | 196 |
| 5 | 120,153,733 | 120,154,068 | 12 | 0.393  | 335 |
| 5 | 123,013,340 | 123,013,578 | 5  | 0.430  | 238 |
| 5 | 126,550,471 | 126,550,718 | 5  | 0.372  | 247 |
| 5 | 127,020,379 | 127,020,502 | 5  | -0.336 | 123 |
| 5 | 128,594,695 | 128,594,705 | 6  | 0.485  | 10  |
| 5 | 128,896,139 | 128,897,021 | 12 | 0.437  | 882 |
| 5 | 138,971,438 | 138,971,699 | 9  | -0.452 | 261 |
| 5 | 140,934,001 | 140,934,207 | 6  | 0.440  | 206 |
| 5 | 141,797,853 | 141,798,055 | 5  | -0.488 | 202 |
| 5 | 155,893,583 | 155,893,861 | 5  | 0.356  | 278 |
| 5 | 156,245,625 | 156,245,854 | 7  | 0.349  | 229 |
| 5 | 160,566,625 | 160,566,924 | 5  | -0.386 | 299 |
| 5 | 165,497,390 | 165,497,668 | 11 | -0.385 | 278 |
| 5 | 166,878,934 | 166,879,727 | 15 | 0.376  | 793 |
| 5 | 168,064,748 | 168,064,764 | 5  | 0.462  | 16  |
| 5 | 168,616,463 | 168,616,813 | 5  | -0.344 | 350 |
| 5 | 169,075,201 | 169,075,215 | 7  | 0.433  | 14  |
| 5 | 169,973,593 | 169,973,692 | 7  | 0.375  | 99  |
| 5 | 170,073,577 | 170,073,601 | 7  | 0.444  | 24  |
| 5 | 171,346,780 | 171,346,839 | 5  | -0.349 | 59  |
| 5 | 171,741,306 | 171,741,755 | 15 | 0.461  | 449 |
| 6 | 3,958,378   | 3,958,474   | 6  | 0.356  | 96  |
| 6 | 3,958,488   | 3,958,768   | 7  | 0.346  | 280 |
| 6 | 11,116,063  | 11,116,423  | 7  | 0.375  | 360 |

|   |             |             |     |        |       |
|---|-------------|-------------|-----|--------|-------|
| 6 | 19,707,101  | 19,707,109  | 5   | 0.415  | 8     |
| 6 | 23,137,375  | 23,137,614  | 5   | 0.442  | 239   |
| 6 | 27,023,172  | 27,023,461  | 7   | -0.454 | 289   |
| 6 | 36,456,612  | 36,457,147  | 7   | 0.343  | 535   |
| 6 | 70,760,115  | 70,760,215  | 5   | -0.356 | 100   |
| 6 | 77,907,512  | 77,907,578  | 5   | 0.360  | 66    |
| 6 | 90,839,015  | 90,839,150  | 5   | 0.426  | 135   |
| 6 | 90,911,155  | 90,911,486  | 9   | -0.340 | 331   |
| 6 | 95,232,527  | 95,232,839  | 19  | -0.366 | 312   |
| 6 | 98,964,414  | 98,964,779  | 6   | -0.420 | 365   |
| 6 | 104,674,252 | 104,674,432 | 7   | -0.412 | 180   |
| 6 | 104,798,507 | 104,798,577 | 5   | -0.373 | 70    |
| 6 | 115,224,254 | 115,224,995 | 16  | 0.442  | 741   |
| 6 | 116,773,361 | 116,773,536 | 5   | -0.531 | 175   |
| 6 | 117,003,602 | 117,003,834 | 6   | 0.363  | 232   |
| 6 | 129,210,761 | 129,210,777 | 9   | 0.473  | 16    |
| 6 | 129,219,304 | 129,219,632 | 7   | 0.385  | 328   |
| 6 | 129,423,482 | 129,423,623 | 6   | 0.360  | 141   |
| 6 | 129,614,102 | 129,614,114 | 6   | -0.476 | 12    |
| 6 | 130,375,980 | 130,376,000 | 9   | -0.339 | 20    |
| 6 | 130,949,892 | 130,949,900 | 5   | -0.544 | 8     |
| 6 | 135,431,998 | 135,432,006 | 5   | -0.518 | 8     |
| 6 | 135,902,803 | 135,903,168 | 7   | -0.434 | 365   |
| 6 | 144,584,469 | 144,584,963 | 5   | -0.387 | 494   |
| 6 | 144,710,452 | 144,710,842 | 15  | -0.538 | 390   |
| 7 | 864,109     | 864,189     | 5   | -0.385 | 80    |
| 7 | 4,615,246   | 4,626,524   | 144 | -0.404 | 11278 |
| 7 | 4,626,647   | 4,632,113   | 59  | -0.403 | 5466  |
| 7 | 4,867,932   | 4,868,647   | 15  | -0.388 | 715   |
| 7 | 9,520,101   | 9,520,210   | 6   | -0.336 | 109   |
| 7 | 13,204,449  | 13,204,588  | 5   | 0.476  | 139   |
| 7 | 21,161,066  | 21,161,078  | 6   | -0.394 | 12    |
| 7 | 30,480,469  | 30,480,796  | 5   | 0.397  | 327   |
| 7 | 32,585,526  | 32,586,089  | 17  | -0.353 | 563   |
| 7 | 32,634,381  | 32,634,595  | 5   | 0.349  | 214   |
| 7 | 32,983,071  | 32,983,400  | 7   | -0.351 | 329   |
| 7 | 33,651,342  | 33,651,557  | 5   | 0.544  | 215   |
| 7 | 35,711,969  | 35,712,290  | 11  | -0.893 | 321   |

|   |             |             |    |        |      |
|---|-------------|-------------|----|--------|------|
| 7 | 36,263,457  | 36,263,674  | 13 | -0.408 | 217  |
| 7 | 36,914,777  | 36,914,842  | 5  | 0.367  | 65   |
| 7 | 37,262,681  | 37,262,736  | 5  | -0.369 | 55   |
| 7 | 50,099,901  | 50,100,060  | 11 | 0.374  | 159  |
| 7 | 50,390,326  | 50,391,256  | 10 | 0.497  | 930  |
| 7 | 50,599,893  | 50,600,183  | 5  | -0.359 | 290  |
| 7 | 66,255,539  | 66,255,551  | 6  | 0.335  | 12   |
| 7 | 66,442,386  | 66,443,050  | 10 | 0.419  | 664  |
| 7 | 74,383,994  | 74,384,372  | 7  | 0.461  | 378  |
| 7 | 75,696,412  | 75,696,446  | 5  | 0.438  | 34   |
| 7 | 87,976,093  | 87,976,109  | 7  | -0.691 | 16   |
| 7 | 110,904,010 | 110,904,024 | 8  | -0.456 | 14   |
| 7 | 116,068,038 | 116,068,348 | 6  | 0.366  | 310  |
| 7 | 119,492,534 | 119,492,548 | 8  | 0.505  | 14   |
| 7 | 130,636,608 | 130,636,875 | 5  | 0.440  | 267  |
| 7 | 132,254,684 | 132,254,885 | 7  | -0.351 | 201  |
| 7 | 133,087,047 | 133,087,274 | 5  | 0.415  | 227  |
| 7 | 133,293,707 | 133,294,009 | 8  | -0.498 | 302  |
| 7 | 133,328,784 | 133,329,853 | 15 | -0.403 | 1069 |
| 7 | 134,669,819 | 134,670,271 | 12 | 0.496  | 452  |
| 7 | 134,804,618 | 134,805,218 | 12 | -0.396 | 600  |
| 7 | 135,168,139 | 135,168,421 | 10 | 0.385  | 282  |
| 7 | 135,169,059 | 135,169,279 | 8  | -0.412 | 220  |
| 7 | 135,223,267 | 135,224,824 | 18 | -0.335 | 1557 |
| 7 | 136,489,031 | 136,489,244 | 5  | 0.380  | 213  |
| 7 | 136,622,250 | 136,623,000 | 20 | 0.559  | 750  |
| 7 | 136,623,062 | 136,623,428 | 6  | 0.351  | 366  |
| 7 | 137,046,707 | 137,046,811 | 8  | -0.342 | 104  |
| 7 | 139,143,178 | 139,143,186 | 5  | -0.358 | 8    |
| 7 | 139,322,835 | 139,323,756 | 16 | 0.433  | 921  |
| 7 | 141,802,638 | 141,803,341 | 8  | -0.382 | 703  |
| 8 | 10,681,179  | 10,681,373  | 10 | 0.425  | 194  |
| 8 | 11,929,643  | 11,930,143  | 8  | 0.395  | 500  |
| 8 | 18,049,989  | 18,050,035  | 8  | 0.653  | 46   |
| 8 | 23,491,151  | 23,491,379  | 5  | 0.357  | 228  |
| 8 | 57,390,468  | 57,390,607  | 7  | -0.397 | 139  |
| 8 | 59,006,344  | 59,006,370  | 13 | 0.341  | 26   |
| 8 | 60,551,619  | 60,551,943  | 10 | 0.364  | 324  |

|   |             |             |    |        |      |
|---|-------------|-------------|----|--------|------|
| 8 | 66,010,174  | 66,010,606  | 9  | -0.335 | 432  |
| 8 | 72,378,554  | 72,378,782  | 6  | 0.347  | 228  |
| 8 | 84,094,124  | 84,094,136  | 7  | -0.852 | 12   |
| 8 | 87,710,920  | 87,711,201  | 7  | 0.463  | 281  |
| 8 | 95,291,672  | 95,291,744  | 5  | -0.377 | 72   |
| 8 | 97,369,493  | 97,370,050  | 7  | -0.402 | 557  |
| 8 | 107,728,813 | 107,728,956 | 7  | -0.356 | 143  |
| 8 | 110,984,569 | 110,985,050 | 6  | 0.443  | 481  |
| 8 | 111,007,217 | 111,007,241 | 7  | -0.440 | 24   |
| 8 | 115,319,814 | 115,320,386 | 25 | -0.550 | 572  |
| 8 | 115,320,552 | 115,320,639 | 6  | -0.394 | 87   |
| 8 | 116,821,213 | 116,821,223 | 6  | -0.512 | 10   |
| 8 | 117,966,482 | 117,966,773 | 5  | -0.387 | 291  |
| 8 | 118,694,160 | 118,694,426 | 8  | -0.376 | 266  |
| 8 | 123,108,620 | 123,108,628 | 5  | 0.355  | 8    |
| 8 | 123,839,405 | 123,839,890 | 5  | 0.337  | 485  |
| 8 | 125,603,518 | 125,604,479 | 27 | -0.415 | 961  |
| 8 | 127,442,152 | 127,442,221 | 6  | -0.485 | 69   |
| 8 | 127,913,397 | 127,913,874 | 9  | -0.386 | 477  |
| 9 | 3,433,147   | 3,433,480   | 6  | -0.336 | 333  |
| 9 | 6,408,584   | 6,408,592   | 5  | -0.563 | 8    |
| 9 | 8,717,866   | 8,718,141   | 5  | -0.451 | 275  |
| 9 | 8,875,311   | 8,875,355   | 6  | -0.492 | 44   |
| 9 | 9,068,595   | 9,068,727   | 5  | 0.334  | 132  |
| 9 | 9,068,734   | 9,069,023   | 10 | 0.342  | 289  |
| 9 | 13,520,111  | 13,520,597  | 5  | -0.389 | 486  |
| 9 | 19,752,500  | 19,752,911  | 11 | 0.520  | 411  |
| 9 | 25,700,037  | 25,700,144  | 5  | -0.364 | 107  |
| 9 | 29,832,205  | 29,832,825  | 8  | 0.407  | 620  |
| 9 | 38,792,278  | 38,792,298  | 6  | 0.452  | 20   |
| 9 | 64,775,087  | 64,775,099  | 7  | 0.348  | 12   |
| 9 | 65,796,674  | 65,796,797  | 5  | 0.483  | 123  |
| 9 | 74,930,298  | 74,930,421  | 6  | 0.435  | 123  |
| 9 | 85,229,996  | 85,230,391  | 15 | -0.440 | 395  |
| 9 | 87,182,604  | 87,184,000  | 19 | -0.347 | 1396 |
| 9 | 102,523,054 | 102,523,254 | 5  | 0.343  | 200  |
| 9 | 107,966,795 | 107,967,231 | 7  | -0.337 | 436  |
| 9 | 108,248,635 | 108,248,647 | 6  | 0.404  | 12   |

|   |             |             |   |        |     |
|---|-------------|-------------|---|--------|-----|
| X | 2,783,483   | 2,783,759   | 6 | -0.394 | 276 |
| X | 5,747,985   | 5,748,050   | 5 | -0.401 | 65  |
| X | 12,801,245  | 12,801,257  | 5 | 0.743  | 12  |
| X | 23,068,502  | 23,068,709  | 9 | -0.344 | 207 |
| X | 26,492,702  | 26,492,853  | 5 | 0.344  | 151 |
| X | 42,894,473  | 42,894,597  | 5 | 0.378  | 124 |
| X | 57,083,752  | 57,084,010  | 5 | -0.459 | 258 |
| X | 90,977,361  | 90,977,561  | 7 | 0.359  | 200 |
| X | 117,037,932 | 117,038,068 | 5 | 0.406  | 136 |
| X | 143,652,989 | 143,653,051 | 6 | 0.363  | 62  |
| X | 153,574,856 | 153,575,048 | 7 | 0.401  | 192 |

---

5% between WKY and LEW rat strains that overlap with genes (n=420 genes). The overlapping

| <i>Average CpG density (SD)</i> | <i>Feature</i> | <i>Chr.</i> | <i>Start (bp)</i> | <i>End (bp)</i> | <b>Overlap</b> |
|---------------------------------|----------------|-------------|-------------------|-----------------|----------------|
| 0.021 (0.152)                   | downstream     | 10          | 68,789,450        | 68,790,450      |                |
| 0.563 (0.089)                   | downstream     | 9           | 65,577,305        | 65,578,305      |                |
| 0.036 (0.098)                   | downstream     | 20          | 7,471,071         | 7,472,071       |                |
| 0.024 (0.114)                   | exon           | 11          | 85,848,019        | 85,848,083      |                |
| 0.029 (0.096)                   | exon           | 1           | 201,199,467       | 201,199,807     |                |
| 0.125 (0.074)                   | exon           | 1           | 135,484,781       | 135,485,301     |                |
| 0.031 (0.112)                   | exon           | 14          | 84,172,756        | 84,173,275      |                |
| 0.031 (0.112)                   | exon           | 14          | 84,173,369        | 84,173,441      |                |
| 0.031 (0.112)                   | exon           | 14          | 84,173,369        | 84,173,441      |                |
| 0.031 (0.112)                   | exon           | 14          | 84,172,756        | 84,173,275      |                |
| 0.026 (0.2)                     | exon           | 2           | 244,382,399       | 244,382,521     |                |
| 0.042 (0.128)                   | exon           | 9           | 8,052,189         | 8,052,522       |                |
| 0.041 (0.104)                   | exon           | 1           | 159,315,191       | 159,315,581     |                |
| 0.027 (0.089)                   | exon           | 10          | 91,104,033        | 91,104,084      |                |
| 0.011 (0.179)                   | exon           | 1           | 213,077,889       | 213,079,869     |                |
| 0.027 (0.087)                   | exon           | 5           | 76,087,276        | 76,087,478      |                |
| 0.027 (0.087)                   | exon           | 5           | 76,088,075        | 76,088,189      |                |
| 0.036 (0.09)                    | exon           | 1           | 249,471,145       | 249,471,156     |                |
| 0.083 (0.098)                   | exon           | 1           | 47,244,366        | 47,244,660      |                |
| 0.025 (0.087)                   | intron         | 10          | 68,548,047        | 68,553,118      |                |
| 0.021 (0.152)                   | intron         | 10          | 68,722,987        | 68,791,526      |                |
| 0.021 (0.145)                   | intron         | 2           | 244,235,672       | 244,289,742     |                |
| 0.042 (0.118)                   | intron         | 2           | 244,235,672       | 244,289,742     |                |
| 0.02 (0.124)                    | intron         | 1           | 246,215,664       | 246,218,699     |                |
| 0.02 (0.124)                    | intron         | 1           | 246,215,664       | 246,218,699     |                |
| 0.015 (0.079)                   | intron         | 7           | 117,329,002       | 117,338,049     |                |
| 0.024 (0.114)                   | intron         | 11          | 85,847,323        | 85,848,019      |                |
| 0.018 (0.171)                   | intron         | 6           | 7,949,298         | 7,951,836       |                |
| 0.044 (0.162)                   | intron         | 7           | 135,287,491       | 135,297,578     |                |
| 0.044 (0.162)                   | intron         | 7           | 135,287,491       | 135,297,578     |                |
| 0.031 (0.112)                   | intron         | 14          | 84,173,275        | 84,173,369      |                |
| 0.031 (0.112)                   | intron         | 14          | 84,173,275        | 84,173,369      |                |
| 0.625 (0.056)                   | intron         | 14          | 92,364,769        | 92,376,887      |                |



|               |        |    |             |             |
|---------------|--------|----|-------------|-------------|
| 0.045 (0.111) | intron | 18 | 71,444,017  | 71,455,837  |
| 0.045 (0.111) | intron | 18 | 71,444,017  | 71,455,837  |
| 0.045 (0.111) | intron | 18 | 71,444,017  | 71,455,837  |
| 0.02 (0.063)  | intron | 5  | 155,543,388 | 155,605,323 |
| 0.013 (0.105) | intron | 5  | 155,440,926 | 155,449,302 |
| 0.114 (0.057) | intron | 5  | 155,440,926 | 155,449,302 |
| 0.023 (0.08)  | intron | 4  | 117,437,900 | 117,451,617 |
| 0.023 (0.08)  | intron | 4  | 117,437,900 | 117,451,617 |
| 0.024 (0.136) | intron | 4  | 48,325,959  | 48,358,013  |
| 0.024 (0.136) | intron | 4  | 48,325,959  | 48,358,013  |
| 0.024 (0.136) | intron | 4  | 48,325,959  | 48,358,013  |
| 0.014 (0.112) | intron | 8  | 11,383,950  | 11,392,901  |
| 0.014 (0.112) | intron | 8  | 11,383,950  | 11,392,901  |
| 0.026 (0.2)   | intron | 2  | 244,380,689 | 244,382,399 |
| 0.042 (0.128) | intron | 9  | 8,020,548   | 8,052,189   |
| 0.058 (0.08)  | intron | 1  | 190,987,715 | 191,006,715 |
| 0.03 (0.114)  | intron | 13 | 44,600,786  | 44,602,200  |
| 0.03 (0.114)  | intron | 13 | 44,600,786  | 44,602,200  |
| 0.026 (0.141) | intron | 5  | 153,335,732 | 153,338,124 |
| 0.021 (0.149) | intron | 5  | 153,342,063 | 153,348,585 |
| 0.021 (0.149) | intron | 5  | 153,342,063 | 153,348,585 |
| 0.026 (0.141) | intron | 5  | 153,335,706 | 153,338,040 |
| 0.049 (0.18)  | intron | 8  | 75,990,972  | 76,013,957  |
| 0.049 (0.18)  | intron | 8  | 75,990,972  | 76,013,957  |
| 0.041 (0.143) | intron | 1  | 250,082,269 | 250,087,870 |
| 0.563 (0.089) | intron | 9  | 65,553,730  | 65,578,381  |
| 0.563 (0.089) | intron | 9  | 65,553,730  | 65,578,381  |
| 0.563 (0.089) | intron | 9  | 65,553,730  | 65,578,381  |
| 0.027 (0.089) | intron | 10 | 91,104,084  | 91,105,285  |
| 0.026 (0.141) | intron | 2  | 182,060,632 | 182,061,216 |
| 0.026 (0.141) | intron | 2  | 182,060,632 | 182,061,216 |
| 0.027 (0.15)  | intron | 6  | 115,268,772 | 115,328,727 |
| 0.043 (0.146) | intron | 5  | 70,549,289  | 70,560,923  |
| 0.043 (0.146) | intron | 5  | 70,549,289  | 70,560,923  |
| 0.027 (0.087) | intron | 5  | 76,087,478  | 76,088,075  |
| 0.036 (0.09)  | intron | 1  | 249,471,156 | 249,471,388 |
| 0.036 (0.09)  | intron | 1  | 249,470,656 | 249,471,145 |
| 0.036 (0.09)  | intron | 1  | 249,470,667 | 249,471,388 |

|               |            |    |             |             |
|---------------|------------|----|-------------|-------------|
| 0.6 (0.061)   | intron     | 3  | 134,321,160 | 134,393,674 |
| 0.022 (0.118) | intron     | 3  | 134,393,767 | 134,438,882 |
| 0.583 (0.051) | intron     | 4  | 157,364,830 | 157,390,255 |
| 0.034 (0.113) | intron     | 5  | 154,760,616 | 154,767,213 |
| 0.013 (0.078) | intron     | 15 | 9,309,684   | 9,345,242   |
| 0.013 (0.078) | intron     | 15 | 9,309,684   | 9,345,242   |
| 0.625 (0.049) | intron     | 11 | 74,287,138  | 74,463,588  |
| 0.025 (0.054) | intron     | 1  | 196,693,498 | 196,826,546 |
| 0.025 (0.054) | intron     | 1  | 196,693,498 | 196,826,546 |
| 0.036 (0.189) | intron     | 16 | 7,111,440   | 7,135,606   |
| 0.014 (0.114) | intron     | 20 | 13,129,801  | 13,133,120  |
| 0.036 (0.098) | intron     | 20 | 7,468,464   | 7,472,048   |
| 0.036 (0.098) | intron     | 20 | 7,468,464   | 7,472,048   |
| 0.015 (0.069) | intron     | 13 | 48,282,035  | 48,285,837  |
| 0.015 (0.069) | intron     | 13 | 48,282,035  | 48,285,837  |
| 0.024 (0.114) | upstream   | 11 | 85,847,310  | 85,848,310  |
| 0.024 (0.114) | upstream   | 11 | 85,848,083  | 85,849,083  |
| 0.024 (0.114) | upstream   | 11 | 85,847,307  | 85,848,307  |
| 0.029 (0.096) | upstream   | 1  | 201,199,807 | 201,200,807 |
| 0.018 (0.195) | upstream   | 5  | 160,518,285 | 160,519,285 |
| 0.035 (0.167) | upstream   | 1  | 186,478,580 | 186,479,580 |
| 0.042 (0.118) | upstream   | 2  | 244,284,602 | 244,285,602 |
| 0.027 (0.089) | upstream   | 10 | 91,103,033  | 91,104,033  |
| 0.238 (0.1)   | upstream   | 5  | 76,203,391  | 76,204,391  |
| 0.041 (0.104) | 3'UTR      | 1  | 159,315,191 | 159,315,300 |
| 0.011 (0.179) | 3'UTR      | 1  | 213,078,112 | 213,079,869 |
| 0.024 (0.114) | 5'UTR      | 11 | 85,848,019  | 85,848,083  |
| 0.029 (0.096) | 5'UTR      | 1  | 201,199,716 | 201,199,807 |
| 0.027 (0.089) | 5'UTR      | 10 | 91,104,033  | 91,104,041  |
| 0.024 (0.135) | 3'UTR      | 10 | 45,286,929  | 45,286,982  |
| 0.024 (0.135) | 3'UTR      | 10 | 45,286,929  | 45,286,982  |
| 0.024 (0.135) | exon       | 10 | 45,286,929  | 45,287,160  |
| 0.024 (0.135) | downstream | 10 | 45,285,929  | 45,286,929  |
| 0.024 (0.135) | downstream | 10 | 45,285,929  | 45,286,929  |
| 0.024 (0.135) | exon       | 10 | 45,286,929  | 45,287,160  |
| 0.024 (0.15)  | intron     | 8  | 85,307,103  | 85,311,432  |
| 0.024 (0.15)  | intron     | 8  | 85,307,103  | 85,311,432  |
| 0.022 (0.174) | intron     | 8  | 126,279,014 | 126,282,878 |

|               |          |    |             |             |
|---------------|----------|----|-------------|-------------|
| 0.022 (0.174) | intron   | 8  | 126,279,120 | 126,283,450 |
| 0.022 (0.174) | intron   | 8  | 126,279,120 | 126,283,450 |
| 0.022 (0.174) | intron   | 8  | 126,279,014 | 126,282,878 |
| 0.147 (0.168) | intron   | 9  | 86,782,434  | 86,787,460  |
| 0.022 (0.099) | intron   | 2  | 22,618,723  | 22,828,298  |
| 0.137 (0.122) | intron   | 7  | 80,591,341  | 80,630,420  |
| 0.019 (0.117) | upstream | 19 | 50,423,220  | 50,424,220  |
| 0.046 (0.107) | intron   | 3  | 33,804,788  | 33,805,745  |
| 0.021 (0.086) | intron   | 8  | 59,693,483  | 59,719,851  |
| 0.069 (0.013) | intron   | X  | 12,543,816  | 12,544,015  |
| 0.069 (0.013) | exon     | X  | 12,544,015  | 12,544,142  |
| 0.313 (0.062) | intron   | 7  | 31,692,197  | 31,751,845  |
| 0.048 (0.084) | intron   | 13 | 66,815,875  | 66,877,144  |
| 0.048 (0.084) | intron   | 13 | 66,815,875  | 66,877,144  |
| 0.019 (0.185) | intron   | 3  | 134,607,698 | 134,634,443 |
| 0.019 (0.185) | intron   | 3  | 134,620,247 | 134,627,108 |
| 0.019 (0.185) | intron   | 3  | 134,607,698 | 134,634,443 |
| 0.042 (0.149) | intron   | 1  | 253,034,913 | 253,036,034 |
| 0.042 (0.149) | intron   | 1  | 253,034,913 | 253,036,034 |
| 0.015 (0.097) | intron   | 8  | 113,746,748 | 113,769,247 |
| 0.114 (0.066) | intron   | 16 | 82,837,706  | 82,839,028  |
| 0.114 (0.066) | intron   | 16 | 82,837,706  | 82,839,028  |
| 0.024 (0.077) | intron   | 1  | 41,149,867  | 41,153,367  |
| 0.055 (0.089) | exon     | 7  | 140,097,985 | 140,098,111 |
| 0.055 (0.089) | intron   | 7  | 140,097,522 | 140,097,985 |
| 0.055 (0.089) | exon     | 7  | 140,097,985 | 140,098,111 |
| 0.055 (0.089) | intron   | 7  | 140,097,522 | 140,097,985 |
| 0.023 (0.099) | intron   | 11 | 68,726,257  | 68,742,527  |
| 0.023 (0.099) | intron   | 11 | 68,726,257  | 68,742,527  |
| 0.023 (0.099) | intron   | 11 | 68,726,257  | 68,742,527  |
| 0.01 (0.066)  | intron   | 4  | 87,155,045  | 87,169,017  |
| 0.01 (0.066)  | intron   | 4  | 87,155,045  | 87,169,017  |
| 0.011 (0.176) | intron   | 2  | 144,945,936 | 145,010,043 |
| 0.011 (0.176) | intron   | 2  | 144,945,936 | 145,010,043 |
| 0.208 (0.086) | intron   | 4  | 184,203,011 | 184,212,697 |
| 0.021 (0.235) | intron   | 1  | 171,700,961 | 171,772,539 |
| 0.045 (0.25)  | intron   | 1  | 171,891,689 | 171,997,453 |
| 0.375 (0.154) | intron   | 14 | 81,650,298  | 81,650,828  |

|               |            |    |             |             |
|---------------|------------|----|-------------|-------------|
| 0.375 (0.154) | intron     | 14 | 81,650,298  | 81,650,828  |
| 0.012 (0.103) | downstream | 18 | 78,989,890  | 78,990,890  |
| 0.012 (0.103) | intron     | 18 | 78,989,888  | 79,025,405  |
| 0.011 (0.123) | intron     | 1  | 8,649,950   | 8,688,527   |
| 0.034 (0.135) | intron     | 1  | 8,649,950   | 8,688,527   |
| 0.039 (0.11)  | intron     | 1  | 8,649,950   | 8,688,527   |
| 0.125 (0.074) | 5'UTR      | 1  | 135,485,114 | 135,485,459 |
| 0.125 (0.074) | upstream   | 1  | 135,484,114 | 135,485,114 |
| 0.125 (0.074) | exon       | 1  | 135,485,114 | 135,486,265 |
| 0.583 (0.003) | intron     | X  | 21,045,000  | 21,079,841  |
| 0.583 (0.003) | intron     | X  | 21,045,000  | 21,079,841  |
| 0.583 (0.003) | intron     | X  | 21,045,000  | 21,079,841  |
| 0.583 (0.003) | intron     | X  | 21,045,000  | 21,079,841  |
| 0.583 (0.003) | intron     | X  | 21,045,000  | 21,079,841  |
| 0.583 (0.003) | intron     | X  | 21,045,000  | 21,079,841  |
| 0.022 (0.108) | intron     | 8  | 50,765,940  | 51,047,329  |
| 0.5 (0.088)   | intron     | 4  | 78,564,894  | 78,573,208  |
| 0.5 (0.088)   | intron     | 4  | 78,564,894  | 78,573,208  |
| 0.5 (0.088)   | intron     | 4  | 78,564,894  | 78,573,208  |
| 0.011 (0.129) | intron     | 1  | 201,690,424 | 201,693,172 |
| 0.011 (0.129) | intron     | 1  | 201,684,635 | 201,701,650 |
| 0.011 (0.129) | intron     | 1  | 201,684,635 | 201,693,172 |
| 0.025 (0.101) | exon       | 7  | 127,373,065 | 127,374,408 |
| 0.025 (0.101) | 3'UTR      | 7  | 127,373,400 | 127,374,408 |
| 0.025 (0.101) | exon       | 7  | 127,373,065 | 127,374,408 |
| 0.025 (0.101) | 3'UTR      | 7  | 127,373,218 | 127,374,408 |
| 0.025 (0.101) | exon       | 7  | 127,373,065 | 127,373,258 |
| 0.025 (0.101) | exon       | 7  | 127,373,343 | 127,373,383 |
| 0.025 (0.101) | downstream | 7  | 127,373,383 | 127,374,383 |
| 0.025 (0.101) | intron     | 7  | 127,373,258 | 127,373,343 |
| 0.018 (0.082) | intron     | 1  | 259,905,837 | 260,092,911 |
| 0.018 (0.082) | intron     | 1  | 259,905,837 | 260,092,911 |
| 0.018 (0.082) | intron     | 1  | 259,905,837 | 260,092,911 |
| 0.053 (0.039) | intron     | 1  | 13,376,038  | 13,559,232  |
| 0.047 (0.108) | intron     | 1  | 13,376,038  | 13,559,232  |
| 0.031 (0.096) | intron     | 6  | 99,471,678  | 99,480,585  |
| 0.015 (0.134) | intron     | 12 | 35,454,179  | 35,458,050  |
| 0.167 (0.104) | intron     | 19 | 57,248,885  | 57,274,659  |

|               |          |    |             |             |
|---------------|----------|----|-------------|-------------|
| 0.167 (0.104) | intron   | 19 | 57,248,885  | 57,274,659  |
| 0.167 (0.104) | intron   | 19 | 57,248,885  | 57,274,659  |
| 0.167 (0.104) | intron   | 19 | 57,248,885  | 57,274,659  |
| 0.375 (0.022) | intron   | 5  | 62,016,637  | 62,049,827  |
| 0.038 (0.112) | intron   | 1  | 220,498,867 | 220,506,364 |
| 0.038 (0.112) | intron   | 1  | 220,498,867 | 220,506,364 |
| 0.036 (0.161) | intron   | 14 | 44,839,309  | 44,840,121  |
| 0.013 (0.115) | intron   | 7  | 32,705,736  | 32,707,148  |
| 0.045 (0.095) | intron   | 16 | 82,871,355  | 82,894,022  |
| 0.032 (0.163) | intron   | 11 | 68,599,290  | 68,601,164  |
| 0.032 (0.163) | intron   | 11 | 68,599,290  | 68,601,164  |
| 0.032 (0.163) | intron   | 11 | 68,599,290  | 68,601,164  |
| 0.032 (0.163) | intron   | 11 | 68,599,290  | 68,601,164  |
| 0.052 (0.138) | upstream | 3  | 10,211,694  | 10,212,694  |
| 0.046 (0.23)  | intron   | 8  | 77,850,725  | 77,858,939  |
| 0.25 (0.164)  | intron   | 9  | 86,651,188  | 86,655,112  |
| 0.25 (0.164)  | intron   | 9  | 86,651,188  | 86,655,112  |
| 0.571 (0.063) | intron   | 6  | 23,977,510  | 23,980,967  |
| 0.015 (0.149) | intron   | 16 | 47,596,609  | 47,600,596  |
| 0.015 (0.149) | exon     | 16 | 47,600,596  | 47,600,727  |
| 0.015 (0.149) | intron   | 16 | 47,600,727  | 47,602,781  |
| 0.6 (0.16)    | intron   | 19 | 49,629,613  | 49,691,466  |
| 0.011 (0.176) | upstream | 2  | 145,005,130 | 145,006,130 |
| 0.034 (0.133) | intron   | 15 | 3,415,943   | 3,458,817   |
| 0.026 (0.093) | intron   | 15 | 3,415,943   | 3,458,817   |
| 0.032 (0.112) | intron   | 3  | 77,624,199  | 77,717,310  |
| 0.028 (0.05)  | intron   | 2  | 235,371,474 | 235,380,224 |
| 0.015 (0.109) | upstream | 20 | 9,688,660   | 9,689,660   |
| 0.036 (0.139) | intron   | 1  | 168,045,108 | 168,089,032 |
| 0.029 (0.116) | intron   | 12 | 12,535,900  | 12,567,849  |
| 0.455 (0.051) | upstream | 10 | 109,942,773 | 109,943,773 |
| 0.583 (0.128) | intron   | 1  | 226,654,537 | 226,659,515 |
| 0.024 (0.169) | intron   | 1  | 135,025,262 | 135,050,301 |
| 0.042 (0.14)  | intron   | 2  | 1,558,626   | 1,595,396   |
| 0.042 (0.14)  | intron   | 2  | 1,558,626   | 1,595,396   |
| 0.042 (0.14)  | intron   | 2  | 1,558,626   | 1,595,396   |
| 0.042 (0.14)  | intron   | 2  | 1,558,626   | 1,595,396   |
| 0.03 (0.079)  | intron   | 12 | 6,604,681   | 6,612,090   |

|               |            |    |             |             |
|---------------|------------|----|-------------|-------------|
| 0.01 (0.152)  | intron     | 3  | 24,734,751  | 24,810,331  |
| 0.054 (0.121) | exon       | 15 | 53,811,021  | 53,811,212  |
| 0.089 (0.111) | intron     | 8  | 114,012,992 | 114,019,690 |
| 0.089 (0.111) | intron     | 8  | 114,012,992 | 114,019,690 |
| 0.089 (0.111) | intron     | 8  | 114,012,992 | 114,019,690 |
| 0.056 (0.09)  | 3'UTR      | 6  | 109,561,707 | 109,562,001 |
| 0.056 (0.09)  | exon       | 6  | 109,561,065 | 109,562,001 |
| 0.096 (0.125) | intron     | 1  | 248,664,435 | 248,665,342 |
| 0.096 (0.125) | intron     | 1  | 248,664,435 | 248,665,342 |
| 0.022 (0.099) | intron     | 2  | 22,687,096  | 22,701,683  |
| 0.027 (0.113) | intron     | 3  | 2,645,870   | 2,647,269   |
| 0.027 (0.08)  | intron     | 5  | 57,620,719  | 57,621,598  |
| 0.027 (0.08)  | intron     | 5  | 57,620,719  | 57,621,598  |
| 0.027 (0.08)  | intron     | 5  | 57,620,719  | 57,621,598  |
| 0.027 (0.08)  | intron     | 5  | 57,620,719  | 57,621,598  |
| 0.026 (0.148) | intron     | 17 | 64,157,087  | 64,204,634  |
| 0.026 (0.148) | intron     | 17 | 64,157,087  | 64,204,634  |
| 0.625 (0.121) | intron     | 5  | 128,442,772 | 128,446,879 |
| 0.625 (0.121) | intron     | 5  | 128,442,975 | 128,446,879 |
| 0.625 (0.121) | intron     | 5  | 128,442,772 | 128,446,879 |
| 0.046 (0.11)  | intron     | 4  | 174,510,179 | 174,517,020 |
| 0.145 (0.061) | intron     | 4  | 174,376,532 | 174,488,913 |
| 0.049 (0.15)  | intron     | 7  | 138,463,656 | 138,464,406 |
| 0.049 (0.15)  | exon       | 7  | 138,463,549 | 138,463,656 |
| 0.013 (0.083) | downstream | 12 | 1,553,463   | 1,554,463   |
| 0.013 (0.195) | intron     | 12 | 40,583,816  | 40,651,575  |
| 0.021 (0.125) | intron     | 9  | 104,714,347 | 104,726,659 |
| 0.068 (0.121) | intron     | 3  | 117,090,646 | 117,151,362 |
| 0.016 (0.2)   | intron     | 2  | 35,603,245  | 35,707,142  |
| 0.056 (0.116) | 3'UTR      | 16 | 19,179,148  | 19,179,650  |
| 0.056 (0.116) | downstream | 16 | 19,179,650  | 19,180,650  |
| 0.056 (0.116) | exon       | 16 | 19,178,940  | 19,179,650  |
| 0.012 (0.167) | intron     | 12 | 9,797,694   | 9,798,800   |
| 0.021 (0.112) | intron     | 20 | 11,616,869  | 11,678,343  |
| 0.031 (0.137) | intron     | 5  | 159,780,898 | 159,782,540 |
| 0.011 (0.122) | intron     | 6  | 123,589,623 | 123,653,535 |
| 0.01 (0.152)  | intron     | 2  | 140,584,549 | 140,738,868 |
| 0.01 (0.152)  | intron     | 2  | 140,584,549 | 140,738,868 |

|               |            |    |             |             |
|---------------|------------|----|-------------|-------------|
| 0.014 (0.188) | intron     | X  | 80,846,526  | 80,907,538  |
| 0.019 (0.096) | intron     | 14 | 80,776,852  | 80,782,391  |
| 0.019 (0.096) | intron     | 14 | 80,776,852  | 80,782,391  |
| 0.019 (0.096) | intron     | 14 | 80,776,852  | 80,782,391  |
| 0.035 (0.142) | intron     | 12 | 34,934,904  | 34,938,069  |
| 0.035 (0.142) | intron     | 12 | 34,934,904  | 34,938,069  |
| 0.035 (0.142) | intron     | 12 | 34,935,321  | 34,938,069  |
| 0.035 (0.142) | intron     | 12 | 34,934,904  | 34,936,793  |
| 0.035 (0.142) | downstream | 12 | 34,935,563  | 34,936,563  |
| 0.625 (0.081) | intron     | 16 | 81,090,223  | 81,098,542  |
| 0.262 (0.073) | intron     | 1  | 78,480,949  | 78,494,441  |
| 0.5 (0.022)   | downstream | 4  | 124,660,294 | 124,661,294 |
| 0.011 (0.157) | intron     | 3  | 146,653,456 | 146,664,067 |
| 0.011 (0.157) | intron     | 3  | 146,653,456 | 146,664,067 |
| 0.053 (0.107) | intron     | 10 | 78,979,638  | 78,991,816  |
| 0.022 (0.113) | intron     | 13 | 80,177,457  | 80,213,960  |
| 0.076 (0.127) | intron     | 8  | 123,556,239 | 123,571,967 |
| 0.089 (0.127) | upstream   | 8  | 51,883,785  | 51,884,785  |
| 0.025 (0.111) | intron     | 10 | 65,218,672  | 65,246,003  |
| 0.025 (0.111) | intron     | 10 | 65,218,672  | 65,246,003  |
| 0.025 (0.111) | intron     | 10 | 65,218,672  | 65,246,003  |
| 0.039 (0.091) | intron     | 5  | 77,924,410  | 77,977,885  |
| 0.013 (0.139) | intron     | 5  | 77,924,410  | 77,977,885  |
| 0.039 (0.091) | intron     | 5  | 77,924,410  | 77,977,885  |
| 0.013 (0.139) | intron     | 5  | 77,924,410  | 77,977,885  |
| 0.167 (0.063) | intron     | 18 | 72,565,723  | 72,584,152  |
| 0.069 (0.013) | intron     | X  | 12,515,257  | 12,551,212  |
| 0.069 (0.013) | intron     | X  | 12,515,257  | 12,551,212  |
| 0.01 (0.119)  | intron     | 10 | 65,609,143  | 65,613,695  |
| 0.01 (0.119)  | intron     | 10 | 65,609,143  | 65,613,695  |
| 0.01 (0.119)  | intron     | 10 | 65,609,143  | 65,613,695  |
| 0.01 (0.119)  | intron     | 10 | 65,609,143  | 65,613,695  |
| 0.6 (0.095)   | intron     | 1  | 189,755,119 | 189,788,495 |
| 0.6 (0.095)   | intron     | 1  | 189,755,119 | 189,788,495 |
| 0.6 (0.095)   | intron     | 1  | 189,755,119 | 189,788,495 |
| 0.6 (0.095)   | intron     | 1  | 189,755,119 | 189,788,495 |
| 0.069 (0.113) | exon       | 10 | 90,070,934  | 90,071,771  |
| 0.069 (0.113) | 3'UTR      | 10 | 90,071,028  | 90,071,771  |

|               |          |    |             |             |
|---------------|----------|----|-------------|-------------|
| 0.069 (0.113) | exon     | 10 | 90,070,934  | 90,071,771  |
| 0.069 (0.113) | 3'UTR    | 10 | 90,071,028  | 90,071,771  |
| 0.135 (0.083) | intron   | 5  | 152,231,528 | 152,238,917 |
| 0.135 (0.083) | intron   | 5  | 152,231,528 | 152,238,917 |
| 0.135 (0.083) | intron   | 5  | 152,228,709 | 152,238,917 |
| 0.044 (0.143) | exon     | 8  | 59,853,528  | 59,856,758  |
| 0.5 (0.092)   | intron   | 10 | 98,798,200  | 98,800,419  |
| 0.097 (0.176) | intron   | 15 | 59,737,832  | 59,738,588  |
| 0.097 (0.176) | intron   | 15 | 59,737,832  | 59,738,588  |
| 0.045 (0.152) | intron   | 2  | 38,086,862  | 38,092,580  |
| 0.045 (0.152) | intron   | 2  | 38,087,907  | 38,092,580  |
| 0.044 (0.158) | intron   | 2  | 181,717,115 | 181,758,689 |
| 0.028 (0.164) | intron   | 13 | 86,647,396  | 86,652,737  |
| 0.018 (0.074) | intron   | 9  | 11,792,562  | 11,867,438  |
| 0.018 (0.074) | intron   | 9  | 11,792,566  | 11,869,774  |
| 0.034 (0.155) | upstream | 3  | 18,997,796  | 18,998,796  |
| 0.048 (0.069) | intron   | 18 | 72,095,827  | 72,126,368  |
| 0.048 (0.069) | intron   | 18 | 72,106,414  | 72,126,368  |
| 0.014 (0.074) | intron   | 17 | 10,912,765  | 10,928,325  |
| 0.022 (0.072) | intron   | 9  | 73,660,984  | 73,691,525  |
| 0.022 (0.072) | intron   | 9  | 73,613,804  | 73,691,525  |
| 0.022 (0.072) | intron   | 9  | 73,612,584  | 73,691,525  |
| 0.059 (0.108) | exon     | 1  | 85,260,167  | 85,260,559  |
| 0.059 (0.108) | intron   | 1  | 85,258,954  | 85,260,167  |
| 0.026 (0.081) | intron   | 5  | 130,481,767 | 130,511,046 |
| 0.026 (0.081) | intron   | 5  | 130,481,767 | 130,511,046 |
| 0.026 (0.081) | intron   | 5  | 130,481,767 | 130,511,046 |
| 0.583 (0.037) | intron   | 4  | 131,857,923 | 131,862,992 |
| 0.011 (0.14)  | intron   | 5  | 157,130,908 | 157,143,798 |
| 0.041 (0.11)  | intron   | 14 | 5,368,591   | 5,393,619   |
| 0.121 (0.071) | intron   | 3  | 106,191,114 | 106,208,447 |
| 0.121 (0.071) | intron   | 3  | 106,191,114 | 106,208,447 |
| 0.121 (0.071) | intron   | 3  | 106,191,114 | 106,208,447 |
| 0.02 (0.164)  | intron   | 9  | 38,627,575  | 38,629,960  |
| 0.128 (0.116) | exon     | 13 | 91,565,218  | 91,567,831  |
| 0.128 (0.116) | 5'UTR    | 13 | 91,565,218  | 91,565,286  |
| 0.233 (0.061) | exon     | 1  | 78,860,378  | 78,860,966  |
| 0.011 (0.108) | intron   | 9  | 63,527,488  | 63,536,577  |



|               |            |    |             |             |
|---------------|------------|----|-------------|-------------|
| 0.011 (0.108) | intron     | 9  | 63,527,488  | 63,536,577  |
| 0.027 (0.124) | intron     | 2  | 178,058,123 | 178,062,868 |
| 0.108 (0.081) | intron     | 12 | 43,692,138  | 43,695,504  |
| 0.108 (0.081) | intron     | 12 | 43,690,982  | 43,695,504  |
| 0.039 (0.129) | intron     | 7  | 137,947,832 | 137,960,093 |
| 0.039 (0.129) | intron     | 7  | 137,947,832 | 137,960,093 |
| 0.029 (0.12)  | intron     | 2  | 34,051,765  | 34,080,899  |
| 0.022 (0.091) | intron     | 1  | 135,132,675 | 135,133,279 |
| 0.143 (0.159) | intron     | 1  | 233,038,799 | 233,041,491 |
| 0.03 (0.153)  | intron     | 3  | 106,583,014 | 106,583,115 |
| 0.03 (0.153)  | intron     | 3  | 106,583,014 | 106,583,115 |
| 0.03 (0.153)  | exon       | 3  | 106,583,115 | 106,583,254 |
| 0.03 (0.153)  | exon       | 3  | 106,583,115 | 106,583,254 |
| 0.05 (0.067)  | intron     | 15 | 12,687,016  | 12,717,468  |
| 0.011 (0.153) | intron     | 14 | 6,268,444   | 6,269,533   |
| 0.011 (0.153) | intron     | 14 | 6,268,444   | 6,269,533   |
| 0.013 (0.189) | downstream | 9  | 6,207,477   | 6,208,477   |
| 0.067 (0.075) | exon       | 2  | 180,479,631 | 180,479,834 |
| 0.067 (0.075) | intron     | 2  | 180,479,834 | 180,479,909 |
| 0.067 (0.075) | exon       | 2  | 180,479,909 | 180,480,036 |
| 0.02 (0.134)  | intron     | 10 | 109,149,622 | 109,175,964 |
| 0.026 (0.097) | intron     | 18 | 66,139,400  | 66,193,405  |
| 0.026 (0.097) | intron     | 18 | 66,139,400  | 66,193,405  |
| 0.027 (0.107) | intron     | 17 | 20,916,166  | 20,918,403  |
| 0.027 (0.107) | exon       | 17 | 20,918,403  | 20,918,490  |
| 0.036 (0.158) | intron     | 4  | 171,010,238 | 171,098,607 |
| 0.036 (0.158) | intron     | 4  | 171,010,238 | 171,098,607 |
| 0.035 (0.173) | intron     | 3  | 146,234,573 | 146,238,306 |
| 0.019 (0.136) | exon       | 3  | 156,326,776 | 156,326,867 |
| 0.019 (0.136) | intron     | 3  | 156,326,867 | 156,328,358 |
| 0.019 (0.136) | 5'UTR      | 3  | 156,326,776 | 156,326,867 |
| 0.019 (0.136) | exon       | 3  | 156,326,776 | 156,326,867 |
| 0.019 (0.136) | intron     | 3  | 156,326,867 | 156,328,358 |
| 0.019 (0.136) | 5'UTR      | 3  | 156,326,776 | 156,326,867 |
| 0.01 (0.074)  | intron     | 2  | 61,695,707  | 61,697,098  |
| 0.01 (0.074)  | exon       | 2  | 61,695,576  | 61,695,707  |
| 0.048 (0.17)  | intron     | 7  | 131,747,848 | 131,760,879 |
| 0.048 (0.17)  | intron     | 7  | 131,747,848 | 131,760,879 |

|               |            |    |             |             |
|---------------|------------|----|-------------|-------------|
| 0.048 (0.17)  | intron     | 7  | 131,752,351 | 131,760,879 |
| 0.031 (0.179) | intron     | 14 | 13,939,309  | 13,954,624  |
| 0.031 (0.179) | intron     | 14 | 13,939,064  | 13,954,628  |
| 0.121 (0.071) | intron     | 3  | 106,188,289 | 106,278,507 |
| 0.028 (0.099) | intron     | 8  | 119,616,788 | 119,647,912 |
| 0.028 (0.099) | intron     | 8  | 119,616,788 | 119,647,912 |
| 0.018 (0.075) | intron     | 12 | 27,413,248  | 27,421,591  |
| 0.022 (0.107) | exon       | 8  | 115,451,785 | 115,453,260 |
| 0.013 (0.13)  | intron     | 20 | 28,107,188  | 28,107,594  |
| 0.013 (0.13)  | exon       | 20 | 28,107,594  | 28,107,984  |
| 0.013 (0.13)  | exon       | 20 | 28,107,594  | 28,107,984  |
| 0.013 (0.13)  | intron     | 20 | 28,107,188  | 28,107,594  |
| 0.027 (0.14)  | intron     | 2  | 44,237,811  | 44,240,432  |
| 0.027 (0.14)  | intron     | 2  | 44,237,811  | 44,240,432  |
| 0.027 (0.14)  | intron     | 2  | 44,237,811  | 44,240,432  |
| 0.02 (0.18)   | intron     | 12 | 15,690,956  | 15,784,246  |
| 0.031 (0.128) | intron     | 12 | 15,690,956  | 15,784,246  |
| 0.037 (0.154) | downstream | 12 | 15,789,813  | 15,790,813  |
| 0.037 (0.154) | downstream | 12 | 15,789,813  | 15,790,813  |
| 0.028 (0.135) | exon       | 20 | 13,999,047  | 13,999,122  |
| 0.028 (0.135) | intron     | 20 | 13,999,122  | 13,999,604  |
| 0.02 (0.1)    | intron     | 20 | 13,614,757  | 13,619,739  |
| 0.02 (0.1)    | intron     | 20 | 13,614,757  | 13,619,739  |
| 0.071 (0.149) | intron     | 16 | 79,486,202  | 79,496,322  |
| 0.04 (0.115)  | intron     | 15 | 24,228,064  | 24,276,974  |
| 0.043 (0.108) | intron     | 15 | 24,352,940  | 24,362,751  |
| 0.028 (0.07)  | intron     | 9  | 102,065,810 | 102,156,203 |
| 0.021 (0.118) | intron     | 16 | 75,892,115  | 75,918,571  |
| 0.024 (0.134) | intron     | 16 | 75,892,115  | 75,918,571  |
| 0.024 (0.074) | exon       | 3  | 74,824,772  | 74,825,000  |
| 0.013 (0.102) | intron     | 3  | 74,827,210  | 74,830,852  |
| 0.024 (0.074) | intron     | 3  | 74,823,839  | 74,824,772  |
| 0.013 (0.102) | intron     | 3  | 74,827,213  | 74,830,852  |
| 0.024 (0.074) | intron     | 3  | 74,825,000  | 74,826,961  |
| 0.024 (0.074) | intron     | 3  | 74,825,000  | 74,826,961  |
| 0.024 (0.074) | exon       | 3  | 74,824,772  | 74,825,000  |
| 0.024 (0.074) | intron     | 3  | 74,823,767  | 74,824,772  |
| 0.092 (0.075) | exon       | 1  | 84,804,420  | 84,805,787  |

|               |            |    |             |             |
|---------------|------------|----|-------------|-------------|
| 0.08 (0.098)  | intron     | 1  | 26,631,354  | 26,694,449  |
| 0.01 (0.151)  | intron     | 6  | 110,357,060 | 110,369,744 |
| 0.01 (0.151)  | exon       | 6  | 110,369,744 | 110,369,809 |
| 0.025 (0.112) | intron     | 16 | 81,395,464  | 81,404,438  |
| 0.025 (0.112) | intron     | 16 | 81,395,464  | 81,404,438  |
| 0.025 (0.112) | intron     | 16 | 81,395,464  | 81,404,438  |
| 0.025 (0.112) | intron     | 16 | 81,395,464  | 81,404,438  |
| 0.026 (0.119) | intron     | 4  | 9,571,584   | 9,574,378   |
| 0.026 (0.119) | intron     | 4  | 9,571,584   | 9,574,378   |
| 0.019 (0.065) | intron     | 2  | 9,682,119   | 9,687,370   |
| 0.019 (0.065) | intron     | 2  | 9,682,119   | 9,687,370   |
| 0.023 (0.1)   | upstream   | 5  | 169,268,006 | 169,269,006 |
| 0.016 (0.192) | intron     | 8  | 32,194,706  | 32,221,105  |
| 0.016 (0.192) | intron     | 8  | 32,194,706  | 32,221,105  |
| 0.037 (0.236) | intron     | 1  | 15,753,542  | 15,756,047  |
| 0.037 (0.236) | intron     | 1  | 15,753,542  | 15,756,047  |
| 0.04 (0.102)  | intron     | 4  | 10,015,983  | 10,041,066  |
| 0.04 (0.102)  | intron     | 4  | 10,015,983  | 10,041,066  |
| 0.04 (0.102)  | intron     | 4  | 10,015,983  | 10,041,066  |
| 0.04 (0.102)  | intron     | 4  | 10,015,983  | 10,041,066  |
| 0.018 (0.17)  | intron     | 4  | 165,637,620 | 165,699,271 |
| 0.556 (0.007) | intron     | 16 | 54,381,762  | 54,382,444  |
| 0.556 (0.007) | intron     | 16 | 54,381,762  | 54,382,444  |
| 0.462 (0.066) | downstream | 10 | 82,762,795  | 82,763,795  |
| 0.462 (0.066) | downstream | 10 | 82,762,795  | 82,763,795  |
| 0.462 (0.066) | downstream | 10 | 82,762,795  | 82,763,795  |
| 0.462 (0.066) | downstream | 10 | 82,762,795  | 82,763,795  |
| 0.462 (0.066) | downstream | 10 | 82,762,795  | 82,763,795  |
| 0.462 (0.066) | downstream | 10 | 82,762,795  | 82,763,795  |
| 0.462 (0.066) | downstream | 10 | 82,762,795  | 82,763,795  |
| 0.012 (0.151) | intron     | 19 | 52,193,737  | 52,213,642  |
| 0.012 (0.151) | intron     | 19 | 52,193,737  | 52,213,642  |
| 0.012 (0.151) | intron     | 19 | 52,193,758  | 52,213,642  |
| 0.031 (0.128) | intron     | 12 | 15,756,528  | 15,767,821  |
| 0.016 (0.184) | intron     | 18 | 3,756,080   | 3,777,647   |
| 0.018 (0.084) | intron     | 4  | 125,978,279 | 126,001,652 |
| 0.018 (0.084) | intron     | 4  | 125,978,279 | 126,001,652 |
| 0.018 (0.084) | intron     | 4  | 125,978,279 | 126,001,652 |

|               |            |    |             |             |
|---------------|------------|----|-------------|-------------|
| 0.04 (0.081)  | intron     | 2  | 28,670,545  | 28,729,097  |
| 0.04 (0.081)  | intron     | 2  | 28,670,545  | 28,729,097  |
| 0.013 (0.15)  | intron     | 19 | 14,328,297  | 14,332,448  |
| 0.027 (0.124) | intron     | 16 | 17,368,195  | 17,397,935  |
| 0.038 (0.035) | intron     | 15 | 85,266,906  | 85,379,826  |
| 0.111 (0.096) | upstream   | 10 | 105,373,626 | 105,374,626 |
| 0.111 (0.096) | upstream   | 10 | 105,373,626 | 105,374,626 |
| 0.068 (0.13)  | upstream   | 4  | 119,369,308 | 119,370,308 |
| 0.03 (0.137)  | intron     | 12 | 39,445,327  | 39,449,931  |
| 0.074 (0.112) | intron     | 1  | 149,750,764 | 149,751,978 |
| 0.038 (0.123) | intron     | 14 | 6,356,219   | 6,356,418   |
| 0.038 (0.123) | exon       | 14 | 6,356,101   | 6,356,219   |
| 0.038 (0.123) | exon       | 14 | 6,356,418   | 6,356,540   |
| 0.059 (0.117) | intron     | 14 | 6,356,540   | 6,359,542   |
| 0.571 (0.076) | intron     | 2  | 196,340,660 | 196,345,693 |
| 0.571 (0.076) | intron     | 2  | 196,340,660 | 196,345,693 |
| 0.031 (0.141) | intron     | 14 | 17,225,123  | 17,280,553  |
| 0.571 (0.096) | downstream | 1  | 85,488,088  | 85,489,088  |
| 0.032 (0.171) | intron     | 3  | 11,923,267  | 11,927,989  |
| 0.018 (0.167) | intron     | 3  | 11,923,267  | 11,927,989  |
| 0.018 (0.167) | intron     | 3  | 11,923,267  | 11,927,989  |
| 0.032 (0.171) | intron     | 3  | 11,923,267  | 11,927,989  |
| 0.036 (0.127) | intron     | 13 | 86,816,883  | 86,901,066  |
| 0.014 (0.112) | intron     | 5  | 167,638,744 | 167,659,981 |
| 0.014 (0.112) | intron     | 5  | 167,638,744 | 167,659,981 |
| 0.014 (0.112) | intron     | 5  | 167,638,744 | 167,659,981 |
| 0.052 (0.123) | intron     | 4  | 152,176,236 | 152,276,168 |
| 0.019 (0.13)  | intron     | 2  | 158,488,991 | 158,591,838 |
| 0.019 (0.13)  | intron     | 2  | 158,488,991 | 158,591,838 |
| 0.012 (0.148) | intron     | 4  | 132,665,867 | 132,724,051 |
| 0.012 (0.148) | intron     | 4  | 132,716,626 | 132,724,051 |
| 0.012 (0.148) | intron     | 4  | 132,716,626 | 132,724,051 |
| 0.012 (0.148) | intron     | 4  | 132,716,626 | 132,724,051 |
| 0.012 (0.148) | intron     | 4  | 132,665,867 | 132,724,051 |
| 0.071 (0.121) | intron     | 20 | 43,225,875  | 43,226,507  |
| 0.313 (0.148) | intron     | 3  | 76,042,814  | 76,048,656  |
| 0.313 (0.148) | intron     | 3  | 76,042,814  | 76,048,656  |
| 0.017 (0.097) | intron     | 4  | 43,357,843  | 43,477,628  |

|               |            |    |             |             |
|---------------|------------|----|-------------|-------------|
| 0.017 (0.097) | intron     | 4  | 43,357,843  | 43,477,628  |
| 0.017 (0.097) | intron     | 4  | 43,357,843  | 43,477,628  |
| 0.012 (0.08)  | intron     | 5  | 126,183,176 | 126,195,248 |
| 0.625 (0.008) | intron     | 9  | 86,839,028  | 86,869,591  |
| 0.022 (0.135) | intron     | 19 | 50,097,754  | 50,111,592  |
| 0.6 (0.07)    | intron     | 9  | 60,772,757  | 60,785,544  |
| 0.6 (0.07)    | intron     | 9  | 60,772,757  | 60,785,544  |
| 0.114 (0.066) | downstream | 16 | 82,837,695  | 82,838,695  |
| 0.114 (0.066) | downstream | 16 | 82,837,695  | 82,838,695  |
| 0.043 (0.141) | intron     | 13 | 81,707,854  | 81,796,317  |
| 0.016 (0.115) | intron     | 3  | 104,871,163 | 104,873,356 |
| 0.016 (0.115) | intron     | 3  | 104,871,163 | 104,873,356 |
| 0.021 (0.104) | intron     | 11 | 79,435,065  | 79,438,311  |
| 0.028 (0.168) | intron     | 5  | 158,287,483 | 158,437,690 |
| 0.028 (0.168) | intron     | 5  | 158,287,483 | 158,437,690 |
| 0.023 (0.1)   | upstream   | 5  | 169,268,007 | 169,269,007 |
| 0.012 (0.162) | intron     | 10 | 83,978,012  | 83,980,894  |
| 0.012 (0.162) | intron     | 10 | 83,978,012  | 83,980,894  |
| 0.012 (0.162) | intron     | 10 | 83,976,206  | 83,980,894  |
| 0.012 (0.162) | intron     | 10 | 83,978,012  | 83,980,894  |
| 0.012 (0.162) | intron     | 10 | 83,976,206  | 83,980,894  |
| 0.048 (0.102) | exon       | 13 | 52,845,991  | 52,849,771  |
| 0.048 (0.102) | exon       | 13 | 52,845,991  | 52,848,984  |
| 0.048 (0.102) | intron     | 13 | 52,840,725  | 52,851,042  |
| 0.059 (0.108) | upstream   | 1  | 85,260,147  | 85,261,147  |
| 0.059 (0.108) | upstream   | 1  | 85,260,147  | 85,261,147  |
| 0.022 (0.13)  | exon       | 3  | 108,930,762 | 108,931,041 |
| 0.022 (0.13)  | intron     | 3  | 108,927,992 | 108,930,762 |
| 0.029 (0.113) | intron     | 15 | 106,634,703 | 106,635,107 |
| 0.029 (0.113) | 3'UTR      | 15 | 106,634,564 | 106,634,703 |
| 0.029 (0.113) | exon       | 15 | 106,634,564 | 106,634,703 |
| 0.029 (0.113) | intron     | 15 | 106,634,703 | 106,635,107 |
| 0.029 (0.113) | exon       | 15 | 106,634,564 | 106,634,703 |
| 0.029 (0.113) | exon       | 15 | 106,634,572 | 106,634,703 |
| 0.029 (0.113) | exon       | 15 | 106,634,564 | 106,634,703 |
| 0.029 (0.113) | exon       | 15 | 106,634,564 | 106,634,703 |
| 0.029 (0.113) | intron     | 15 | 106,634,703 | 106,635,107 |
| 0.029 (0.113) | intron     | 15 | 106,634,703 | 106,635,107 |

|               |            |    |             |             |
|---------------|------------|----|-------------|-------------|
| 0.029 (0.113) | intron     | 15 | 106,634,703 | 106,635,107 |
| 0.029 (0.113) | intron     | 15 | 106,634,703 | 106,635,107 |
| 0.029 (0.113) | exon       | 15 | 106,634,564 | 106,634,703 |
| 0.104 (0.075) | intron     | 2  | 43,092,302  | 43,124,987  |
| 0.104 (0.075) | intron     | 2  | 43,092,302  | 43,124,987  |
| 0.018 (0.195) | downstream | 5  | 160,518,857 | 160,519,857 |
| 0.023 (0.079) | intron     | 5  | 145,416,611 | 145,425,173 |
| 0.023 (0.079) | intron     | 5  | 145,410,946 | 145,425,173 |
| 0.106 (0.097) | intron     | 3  | 7,496,643   | 7,524,043   |
| 0.106 (0.097) | intron     | 3  | 7,516,437   | 7,524,043   |
| 0.047 (0.108) | intron     | 1  | 13,385,900  | 13,572,433  |
| 0.053 (0.039) | intron     | 1  | 13,383,168  | 13,385,786  |
| 0.083 (0.165) | downstream | 9  | 105,784,268 | 105,785,268 |
| 0.083 (0.165) | downstream | 9  | 105,784,268 | 105,785,268 |
| 0.013 (0.134) | 3'UTR      | 11 | 73,147,651  | 73,148,932  |
| 0.013 (0.134) | exon       | 11 | 73,147,651  | 73,148,932  |
| 0.013 (0.134) | upstream   | 11 | 73,148,932  | 73,149,932  |
| 0.455 (0.051) | intron     | 10 | 109,849,240 | 110,020,353 |
| 0.583 (0.041) | upstream   | 19 | 25,293,433  | 25,294,433  |
| 0.583 (0.041) | upstream   | 19 | 25,293,433  | 25,294,433  |
| 0.583 (0.041) | upstream   | 19 | 25,293,433  | 25,294,433  |
| 0.583 (0.041) | intron     | 19 | 25,293,432  | 25,300,699  |
| 0.5 (0.105)   | intron     | 13 | 32,714,833  | 32,716,476  |
| 0.6 (0.16)    | intron     | 19 | 49,645,537  | 49,649,660  |
| 0.032 (0.182) | intron     | 5  | 106,164,165 | 106,297,994 |
| 0.032 (0.182) | intron     | 5  | 106,164,165 | 106,297,994 |
| 0.037 (0.113) | upstream   | 8  | 48,907,693  | 48,908,693  |
| 0.015 (0.126) | intron     | 4  | 9,276,573   | 9,285,502   |
| 0.021 (0.109) | intron     | 12 | 7,885,613   | 7,904,181   |
| 0.013 (0.083) | upstream   | 12 | 1,552,353   | 1,553,353   |
| 0.013 (0.083) | upstream   | 12 | 1,552,353   | 1,553,353   |
| 0.019 (0.093) | intron     | 8  | 127,592,040 | 127,593,372 |
| 0.012 (0.19)  | intron     | 1  | 190,108,640 | 190,109,663 |
| 0.012 (0.19)  | intron     | 1  | 190,108,640 | 190,109,663 |
| 0.012 (0.19)  | exon       | 1  | 190,109,663 | 190,109,778 |
| 0.012 (0.19)  | exon       | 1  | 190,109,663 | 190,109,778 |
| 0.6 (0.1)     | intron     | 19 | 27,908,780  | 27,922,589  |
| 0.6 (0.1)     | intron     | 19 | 27,908,780  | 27,922,589  |

|               |          |    |             |             |
|---------------|----------|----|-------------|-------------|
| 0.034 (0.074) | intron   | 4  | 128,356,111 | 128,596,806 |
| 0.025 (0.133) | upstream | 9  | 93,099,368  | 93,100,368  |
| 0.056 (0.198) | intron   | 5  | 51,219,898  | 51,223,453  |
| 0.016 (0.161) | intron   | 20 | 43,586,897  | 43,642,495  |
| 0.016 (0.161) | intron   | 20 | 43,586,897  | 43,642,495  |
| 0.147 (0.1)   | exon     | 20 | 13,116,298  | 13,116,709  |
| 0.076 (0.038) | intron   | 13 | 67,544,405  | 67,578,397  |
| 0.076 (0.038) | intron   | 13 | 67,544,405  | 67,578,397  |
| 0.014 (0.117) | intron   | 18 | 3,687,839   | 3,692,202   |
| 0.625 (0.002) | intron   | X  | 55,966,136  | 55,968,717  |
| 0.017 (0.051) | upstream | 2  | 236,070,887 | 236,071,887 |
| 0.5 (0.177)   | intron   | 16 | 80,710,530  | 80,761,951  |
| 0.5 (0.177)   | intron   | 16 | 80,710,530  | 80,761,951  |
| 0.038 (0.16)  | intron   | 4  | 5,500,612   | 5,580,631   |
| 0.571 (0.102) | intron   | 4  | 5,500,612   | 5,580,631   |
| 0.048 (0.073) | intron   | 13 | 78,222,704  | 78,224,216  |
| 0.048 (0.073) | intron   | 13 | 78,222,704  | 78,224,216  |
| 0.048 (0.073) | intron   | 13 | 78,222,704  | 78,224,216  |
| 0.034 (0.084) | intron   | 17 | 27,481,205  | 27,497,055  |
| 0.034 (0.084) | intron   | 17 | 27,473,936  | 27,497,055  |
| 0.034 (0.084) | intron   | 17 | 27,474,054  | 27,497,055  |
| 0.034 (0.084) | intron   | 17 | 27,473,936  | 27,497,055  |
| 0.047 (0.124) | intron   | 17 | 11,498,091  | 11,552,622  |
| 0.192 (0.067) | intron   | 17 | 11,630,315  | 11,736,990  |
| 0.047 (0.124) | intron   | 17 | 11,498,091  | 11,552,622  |
| 0.047 (0.124) | intron   | 17 | 11,498,091  | 11,552,622  |
| 0.192 (0.067) | intron   | 17 | 11,630,315  | 11,736,990  |
| 0.192 (0.067) | intron   | 17 | 11,630,315  | 11,736,990  |
| 0.192 (0.067) | intron   | 17 | 11,681,664  | 11,736,990  |
| 0.5 (0.157)   | intron   | 1  | 67,874,609  | 67,874,759  |
| 0.084 (0.033) | exon     | 4  | 156,324,272 | 156,324,435 |
| 0.084 (0.033) | exon     | 4  | 156,324,272 | 156,324,435 |
| 0.084 (0.033) | exon     | 4  | 156,324,272 | 156,324,435 |
| 0.039 (0.159) | exon     | 3  | 58,744,323  | 58,744,470  |
| 0.039 (0.159) | exon     | 3  | 58,744,323  | 58,744,470  |
| 0.039 (0.159) | exon     | 3  | 58,744,323  | 58,744,470  |
| 0.039 (0.159) | exon     | 3  | 58,744,323  | 58,744,470  |
| 0.039 (0.159) | exon     | 3  | 58,744,323  | 58,744,470  |

|               |          |    |             |             |
|---------------|----------|----|-------------|-------------|
| 0.039 (0.159) | intron   | 3  | 58,744,470  | 58,785,045  |
| 0.043 (0.156) | intron   | 3  | 58,810,635  | 58,811,530  |
| 0.039 (0.159) | intron   | 3  | 58,744,470  | 58,785,045  |
| 0.039 (0.159) | intron   | 3  | 58,744,470  | 58,785,045  |
| 0.043 (0.156) | intron   | 3  | 58,810,635  | 58,811,530  |
| 0.043 (0.156) | intron   | 3  | 58,785,096  | 58,811,530  |
| 0.043 (0.156) | intron   | 3  | 58,810,635  | 58,811,530  |
| 0.043 (0.156) | intron   | 3  | 58,810,635  | 58,811,530  |
| 0.039 (0.159) | intron   | 3  | 58,744,470  | 58,785,045  |
| 0.039 (0.159) | intron   | 3  | 58,744,470  | 58,785,045  |
| 0.012 (0.161) | intron   | 10 | 91,035,059  | 91,039,974  |
| 0.086 (0.13)  | intron   | 17 | 74,844,313  | 74,844,601  |
| 0.086 (0.13)  | intron   | 17 | 74,844,313  | 74,846,966  |
| 0.086 (0.13)  | intron   | 17 | 74,844,313  | 74,845,291  |
| 0.029 (0.107) | exon     | 7  | 140,328,789 | 140,329,260 |
| 0.029 (0.107) | upstream | 7  | 140,329,260 | 140,330,260 |
| 0.023 (0.144) | intron   | 1  | 4,481,813   | 4,485,520   |
| 0.023 (0.144) | intron   | 1  | 4,481,813   | 4,485,520   |
| 0.023 (0.144) | intron   | 1  | 4,481,813   | 4,485,520   |
| 0.027 (0.072) | intron   | 9  | 53,272,498  | 53,273,627  |
| 0.013 (0.123) | intron   | 9  | 102,649,335 | 102,686,954 |
| 0.013 (0.123) | intron   | 9  | 102,649,335 | 102,686,954 |
| 0.053 (0.108) | upstream | 9  | 102,644,928 | 102,645,928 |
| 0.013 (0.123) | intron   | 9  | 102,649,610 | 102,665,146 |
| 0.053 (0.108) | intron   | 9  | 102,642,627 | 102,649,145 |
| 0.053 (0.108) | intron   | 9  | 102,642,627 | 102,649,145 |
| 0.016 (0.127) | upstream | 1  | 72,948,877  | 72,949,877  |
| 0.016 (0.127) | upstream | 1  | 72,948,877  | 72,949,877  |
| 0.016 (0.127) | exon     | 1  | 72,948,535  | 72,948,877  |
| 0.016 (0.127) | exon     | 1  | 72,948,535  | 72,948,877  |
| 0.5 (0.142)   | intron   | 14 | 85,663,902  | 85,666,933  |
| 0.5 (0.142)   | intron   | 14 | 85,663,902  | 85,666,933  |
| 0.5 (0.142)   | intron   | 14 | 85,663,902  | 85,666,933  |
| 0.143 (0.153) | intron   | 3  | 8,370,842   | 8,426,807   |
| 0.046 (0.134) | intron   | 5  | 168,164,792 | 168,168,799 |
| 0.046 (0.134) | intron   | 5  | 168,164,792 | 168,168,799 |
| 0.061 (0.09)  | intron   | 5  | 168,164,792 | 168,168,799 |
| 0.061 (0.09)  | intron   | 5  | 168,164,792 | 168,168,799 |



|               |            |    |             |             |
|---------------|------------|----|-------------|-------------|
| 0.013 (0.155) | intron     | 1  | 253,196,383 | 253,202,466 |
| 0.03 (0.037)  | intron     | 9  | 46,494,201  | 46,497,029  |
| 0.03 (0.037)  | intron     | 9  | 46,494,201  | 46,496,964  |
| 0.031 (0.062) | intron     | 5  | 156,684,154 | 156,691,135 |
| 0.031 (0.062) | intron     | 5  | 156,684,154 | 156,691,135 |
| 0.069 (0.148) | intron     | 4  | 182,691,556 | 182,725,790 |
| 0.032 (0.116) | intron     | 4  | 182,691,556 | 182,692,779 |
| 0.032 (0.116) | intron     | 4  | 182,691,556 | 182,725,790 |
| 0.069 (0.148) | intron     | 4  | 182,691,556 | 182,692,779 |
| 0.017 (0.146) | intron     | 5  | 157,980,961 | 158,028,775 |
| 0.017 (0.146) | intron     | 5  | 157,980,961 | 158,028,775 |
| 0.017 (0.146) | intron     | 5  | 157,980,961 | 158,028,775 |
| 0.022 (0.17)  | downstream | 5  | 145,408,365 | 145,409,365 |
| 0.031 (0.079) | intron     | 9  | 39,461,535  | 39,462,297  |
| 0.031 (0.079) | intron     | 9  | 39,461,535  | 39,462,297  |
| 0.031 (0.079) | intron     | 9  | 39,461,535  | 39,462,297  |
| 0.041 (0.148) | intron     | 4  | 183,804,324 | 183,806,886 |
| 0.041 (0.148) | intron     | 4  | 183,804,324 | 183,806,886 |
| 0.041 (0.148) | intron     | 4  | 183,804,324 | 183,806,886 |
| 0.041 (0.148) | intron     | 4  | 183,804,324 | 183,806,886 |
| 0.036 (0.123) | intron     | 14 | 110,243,555 | 110,244,792 |
| 0.036 (0.123) | exon       | 14 | 110,244,792 | 110,244,853 |
| 0.036 (0.123) | exon       | 14 | 110,244,857 | 110,244,875 |
| 0.036 (0.123) | intron     | 14 | 110,243,555 | 110,245,294 |
| 0.036 (0.123) | intron     | 14 | 110,244,853 | 110,244,857 |
| 0.036 (0.123) | upstream   | 14 | 110,244,875 | 110,245,875 |
| 0.179 (0.087) | intron     | 20 | 24,636,640  | 24,686,081  |
| 0.061 (0.096) | intron     | 12 | 41,330,784  | 41,337,390  |
| 0.089 (0.106) | intron     | 20 | 9,887,131   | 9,891,454   |
| 0.015 (0.162) | intron     | 20 | 9,822,887   | 9,866,651   |
| 0.056 (0.178) | intron     | 20 | 12,967,638  | 12,984,417  |
| 0.022 (0.153) | downstream | 11 | 37,766,795  | 37,767,795  |
| 0.214 (0.151) | intron     | 11 | 35,041,368  | 35,115,579  |
| 0.214 (0.151) | intron     | 11 | 35,041,368  | 35,115,579  |
| 0.583 (0.1)   | intron     | 10 | 108,922,366 | 108,923,036 |
| 0.029 (0.098) | intron     | 15 | 108,786,762 | 108,905,107 |
| 0.029 (0.098) | intron     | 15 | 108,786,762 | 108,905,107 |
| 0.022 (0.091) | intron     | 6  | 48,071,965  | 48,078,157  |

|               |            |    |             |             |
|---------------|------------|----|-------------|-------------|
| 0.022 (0.091) | intron     | 6  | 48,071,965  | 48,078,157  |
| 0.014 (0.152) | intron     | 3  | 47,275,915  | 47,279,666  |
| 0.024 (0.115) | intron     | 3  | 47,280,824  | 47,294,338  |
| 0.014 (0.152) | intron     | 3  | 47,275,915  | 47,279,666  |
| 0.014 (0.152) | intron     | 3  | 47,275,915  | 47,279,666  |
| 0.024 (0.115) | intron     | 3  | 47,280,824  | 47,294,338  |
| 0.024 (0.115) | intron     | 3  | 47,280,824  | 47,294,338  |
| 0.018 (0.051) | 3'UTR      | 6  | 54,651,838  | 54,652,276  |
| 0.018 (0.051) | downstream | 6  | 54,652,276  | 54,653,276  |
| 0.018 (0.051) | exon       | 6  | 54,651,788  | 54,652,276  |
| 0.066 (0.087) | intron     | 6  | 145,244,691 | 145,261,934 |
| 0.027 (0.062) | intron     | 7  | 115,930,383 | 116,037,650 |
| 0.027 (0.178) | intron     | 5  | 163,939,195 | 164,082,629 |
| 0.027 (0.178) | intron     | 5  | 163,939,195 | 164,082,629 |
| 0.038 (0.113) | intron     | 13 | 44,538,198  | 44,546,898  |
| 0.038 (0.113) | exon       | 13 | 44,536,741  | 44,538,198  |
| 0.037 (0.11)  | intron     | 8  | 1,269,573   | 1,435,970   |
| 0.037 (0.11)  | intron     | 8  | 1,269,573   | 1,435,970   |
| 0.037 (0.11)  | intron     | 8  | 1,269,573   | 1,435,970   |
| 0.6 (0.146)   | intron     | 3  | 163,749,510 | 163,773,319 |
| 0.068 (0.055) | downstream | 13 | 48,364,610  | 48,365,610  |
| 0.031 (0.084) | intron     | 5  | 66,066,568  | 66,083,419  |
| 0.206 (0.084) | intron     | 4  | 43,687,337  | 43,689,437  |
| 0.039 (0.128) | intron     | 10 | 20,788,615  | 20,795,295  |
| 0.179 (0.053) | intron     | 15 | 14,202,559  | 14,214,979  |
| 0.179 (0.053) | intron     | 15 | 14,199,300  | 14,214,979  |
| 0.179 (0.053) | intron     | 15 | 14,202,559  | 14,214,979  |
| 0.179 (0.053) | intron     | 15 | 14,201,671  | 14,214,979  |
| 0.052 (0.138) | intron     | 3  | 10,165,847  | 10,238,819  |
| 0.625 (0.123) | intron     | 4  | 172,835,454 | 172,914,497 |
| 0.032 (0.033) | intron     | 2  | 69,651,452  | 69,672,089  |
| 0.036 (0.096) | intron     | 4  | 62,698,741  | 62,701,567  |
| 0.036 (0.096) | intron     | 4  | 62,698,741  | 62,701,567  |
| 0.018 (0.063) | intron     | 15 | 106,213,318 | 106,225,444 |
| 0.04 (0.083)  | intron     | 15 | 106,213,318 | 106,225,444 |
| 0.017 (0.095) | intron     | 10 | 86,278,079  | 86,279,208  |
| 0.017 (0.095) | intron     | 10 | 86,278,079  | 86,279,208  |
| 0.017 (0.095) | intron     | 10 | 86,278,079  | 86,279,208  |

|               |        |    |             |             |
|---------------|--------|----|-------------|-------------|
| 0.017 (0.095) | intron | 10 | 86,278,079  | 86,279,208  |
| 0.024 (0.148) | intron | 17 | 13,997,649  | 14,000,874  |
| 0.024 (0.148) | intron | 17 | 13,997,649  | 14,000,696  |
| 0.571 (0.072) | intron | 19 | 31,582,511  | 31,627,694  |
| 0.061 (0.1)   | intron | 4  | 8,962,287   | 8,966,958   |
| 0.035 (0.063) | intron | 4  | 8,967,114   | 8,973,526   |
| 0.05 (0.061)  | intron | 3  | 161,406,089 | 161,418,720 |
| 0.05 (0.061)  | intron | 3  | 161,399,780 | 161,418,720 |
| 0.05 (0.061)  | intron | 3  | 161,406,089 | 161,413,562 |
| 0.05 (0.061)  | intron | 3  | 161,406,089 | 161,413,562 |
| 0.05 (0.061)  | intron | 3  | 161,399,780 | 161,428,828 |
| 0.011 (0.101) | intron | 16 | 49,778,862  | 49,785,500  |
| 0.011 (0.101) | intron | 16 | 49,778,862  | 49,785,500  |
| 0.011 (0.101) | intron | 16 | 49,778,862  | 49,785,500  |
| 0.011 (0.101) | intron | 16 | 49,778,862  | 49,785,500  |
| 0.011 (0.101) | intron | 16 | 49,778,862  | 49,785,500  |
| 0.011 (0.101) | intron | 16 | 49,778,862  | 49,785,500  |
| 0.011 (0.101) | intron | 16 | 49,778,862  | 49,785,500  |
| 0.023 (0.18)  | intron | 18 | 14,586,920  | 14,618,341  |
| 0.015 (0.225) | intron | 1  | 155,723,968 | 155,725,640 |
| 0.015 (0.225) | intron | 1  | 155,723,968 | 155,725,640 |
| 0.125 (0.07)  | exon   | 8  | 58,788,000  | 58,788,147  |
| 0.064 (0.111) | intron | 18 | 6,449,624   | 6,628,189   |
| 0.03 (0.142)  | intron | 1  | 189,565,033 | 189,584,733 |
| 0.03 (0.142)  | intron | 1  | 189,565,033 | 189,584,733 |
| 0.03 (0.142)  | intron | 1  | 189,565,033 | 189,584,733 |
| 0.03 (0.142)  | intron | 1  | 189,550,452 | 189,584,733 |
| 0.03 (0.142)  | intron | 1  | 189,565,033 | 189,584,733 |
| 0.03 (0.142)  | intron | 1  | 189,563,712 | 189,584,733 |
| 0.022 (0.091) | intron | 9  | 71,642,183  | 71,735,472  |
| 0.047 (0.156) | intron | 16 | 83,851,374  | 83,878,030  |
| 0.047 (0.156) | intron | 16 | 83,851,374  | 83,878,030  |
| 0.047 (0.156) | intron | 16 | 83,851,374  | 83,878,030  |
| 0.047 (0.107) | intron | 6  | 12,632,510  | 12,637,003  |
| 0.047 (0.107) | exon   | 6  | 12,637,003  | 12,637,189  |
| 0.047 (0.107) | exon   | 6  | 12,637,003  | 12,637,189  |
| 0.047 (0.107) | intron | 6  | 12,632,510  | 12,637,003  |
| 0.047 (0.107) | exon   | 6  | 12,637,003  | 12,637,189  |

|               |            |    |             |             |
|---------------|------------|----|-------------|-------------|
| 0.047 (0.107) | intron     | 6  | 12,636,224  | 12,637,003  |
| 0.047 (0.107) | intron     | 6  | 12,637,189  | 12,639,690  |
| 0.047 (0.107) | intron     | 6  | 12,637,189  | 12,639,690  |
| 0.047 (0.107) | intron     | 6  | 12,632,510  | 12,639,690  |
| 0.047 (0.107) | intron     | 6  | 12,637,189  | 12,639,690  |
| 0.025 (0.154) | intron     | 6  | 12,865,526  | 12,925,920  |
| 0.025 (0.154) | intron     | 6  | 12,865,526  | 12,925,920  |
| 0.01 (0.187)  | intron     | 18 | 4,285,134   | 4,291,057   |
| 0.055 (0.092) | intron     | 2  | 30,890,355  | 30,891,147  |
| 0.055 (0.092) | exon       | 2  | 30,889,816  | 30,890,355  |
| 0.042 (0.071) | intron     | 5  | 168,286,088 | 168,291,305 |
| 0.042 (0.071) | intron     | 5  | 168,286,088 | 168,291,305 |
| 0.042 (0.071) | intron     | 5  | 168,286,088 | 168,291,305 |
| 0.02 (0.141)  | intron     | 19 | 11,071,931  | 11,078,711  |
| 0.028 (0.068) | intron     | 5  | 158,594,087 | 158,643,754 |
| 0.015 (0.162) | intron     | 1  | 164,722,312 | 164,772,757 |
| 0.083 (0.117) | exon       | 9  | 74,829,625  | 74,829,810  |
| 0.083 (0.117) | exon       | 9  | 74,829,625  | 74,829,810  |
| 0.083 (0.117) | exon       | 9  | 74,829,625  | 74,829,810  |
| 0.022 (0.146) | intron     | 1  | 203,383,855 | 203,426,071 |
| 0.022 (0.146) | intron     | 1  | 203,383,721 | 203,459,580 |
| 0.019 (0.108) | upstream   | 2  | 190,762,376 | 190,763,376 |
| 0.014 (0.117) | intron     | 2  | 121,630,327 | 121,679,188 |
| 0.583 (0.03)  | intron     | 13 | 90,933,659  | 91,210,244  |
| 0.128 (0.156) | intron     | 13 | 90,933,659  | 91,210,244  |
| 0.5 (0.042)   | intron     | 7  | 55,782,260  | 55,806,767  |
| 0.027 (0.126) | intron     | 3  | 89,254,471  | 89,380,782  |
| 0.025 (0.121) | intron     | 11 | 73,333,482  | 73,363,854  |
| 0.031 (0.073) | downstream | 13 | 44,919,902  | 44,920,902  |
| 0.031 (0.073) | intron     | 13 | 44,920,958  | 44,922,588  |
| 0.031 (0.073) | intron     | 13 | 44,910,268  | 44,922,588  |
| 0.031 (0.073) | exon       | 13 | 44,920,902  | 44,920,958  |
| 0.031 (0.073) | downstream | 13 | 44,919,902  | 44,920,902  |
| 0.031 (0.073) | exon       | 13 | 44,920,902  | 44,920,958  |
| 0.031 (0.073) | intron     | 13 | 44,920,958  | 44,922,588  |
| 0.571 (0.096) | intron     | 1  | 85,487,946  | 85,488,827  |
| 0.032 (0.179) | exon       | 16 | 71,907,118  | 71,907,214  |
| 0.032 (0.179) | intron     | 16 | 71,907,214  | 71,912,273  |

|               |          |    |             |             |
|---------------|----------|----|-------------|-------------|
| 0.013 (0.089) | upstream | 17 | 15,895,367  | 15,896,367  |
| 0.045 (0.061) | intron   | 3  | 40,778,183  | 40,856,713  |
| 0.041 (0.087) | 5'UTR    | 3  | 165,213,540 | 165,213,573 |
| 0.041 (0.087) | intron   | 3  | 165,213,573 | 165,213,665 |
| 0.041 (0.087) | upstream | 3  | 165,212,540 | 165,213,540 |
| 0.041 (0.087) | exon     | 3  | 165,213,540 | 165,213,573 |
| 0.026 (0.118) | intron   | 19 | 53,188,864  | 53,190,417  |
| 0.068 (0.093) | intron   | 2  | 252,633,539 | 252,672,255 |
| 0.021 (0.109) | upstream | 12 | 7,891,407   | 7,892,407   |
| 0.159 (0.007) | intron   | 12 | 40,151,228  | 40,225,769  |
| 0.6 (0.043)   | intron   | 2  | 179,088,913 | 179,227,647 |
| 0.039 (0.148) | intron   | 7  | 138,827,694 | 138,847,150 |
| 0.02 (0.15)   | intron   | 7  | 138,688,918 | 138,827,484 |
| 0.035 (0.109) | intron   | 8  | 118,909,081 | 118,919,789 |
| 0.5 (0.023)   | intron   | 4  | 3,235,088   | 3,344,872   |
| 0.5 (0.023)   | intron   | 4  | 3,235,088   | 3,565,245   |
| 0.098 (0.019) | intron   | 15 | 79,582,819  | 79,771,222  |
| 0.098 (0.019) | intron   | 15 | 79,582,819  | 79,771,222  |
| 0.017 (0.127) | intron   | 16 | 71,866,438  | 71,870,250  |
| 0.022 (0.18)  | intron   | 8  | 111,017,958 | 111,019,312 |
| 0.022 (0.18)  | upstream | 8  | 111,018,335 | 111,019,335 |
| 0.6 (0.017)   | intron   | 4  | 76,734,402  | 76,857,149  |
| 0.026 (0.165) | exon     | 7  | 1,055,388   | 1,055,442   |
| 0.026 (0.165) | intron   | 7  | 1,055,376   | 1,055,388   |
| 0.026 (0.165) | exon     | 7  | 1,054,484   | 1,054,649   |
| 0.026 (0.165) | intron   | 7  | 1,054,649   | 1,055,208   |
| 0.026 (0.165) | exon     | 7  | 1,055,208   | 1,055,376   |
| 0.04 (0.133)  | intron   | 8  | 115,861,900 | 115,876,541 |
| 0.01 (0.11)   | exon     | 2  | 201,430,495 | 201,430,637 |
| 0.01 (0.11)   | intron   | 2  | 201,422,022 | 201,430,289 |
| 0.01 (0.11)   | exon     | 2  | 201,430,289 | 201,430,409 |
| 0.01 (0.11)   | intron   | 2  | 201,430,409 | 201,430,495 |
| 0.049 (0.051) | intron   | 2  | 201,387,321 | 201,401,002 |
| 0.042 (0.15)  | upstream | 4  | 78,807,400  | 78,808,400  |
| 0.041 (0.112) | exon     | 11 | 37,730,168  | 37,730,235  |
| 0.041 (0.112) | intron   | 11 | 37,730,164  | 37,730,168  |
| 0.041 (0.112) | exon     | 11 | 37,730,260  | 37,730,343  |
| 0.041 (0.112) | intron   | 11 | 37,730,235  | 37,730,260  |

|               |            |    |             |             |
|---------------|------------|----|-------------|-------------|
| 0.041 (0.112) | upstream   | 11 | 37,730,343  | 37,731,343  |
| 0.041 (0.112) | exon       | 11 | 37,730,113  | 37,730,164  |
| 0.074 (0.135) | intron     | 9  | 101,293,218 | 101,532,533 |
| 0.027 (0.04)  | upstream   | 5  | 80,597,573  | 80,598,573  |
| 0.051 (0.122) | upstream   | 1  | 85,504,431  | 85,505,431  |
| 0.051 (0.122) | exon       | 1  | 85,505,431  | 85,505,538  |
| 0.051 (0.122) | 5'UTR      | 1  | 85,505,431  | 85,505,538  |
| 0.027 (0.062) | upstream   | 7  | 115,976,941 | 115,977,941 |
| 0.022 (0.047) | intron     | 2  | 230,675,795 | 230,697,881 |
| 0.046 (0.045) | intron     | 10 | 67,049,926  | 67,065,480  |
| 0.135 (0.083) | intron     | 5  | 152,218,302 | 152,379,095 |
| 0.01 (0.212)  | intron     | 2  | 189,024,362 | 189,052,866 |
| 0.014 (0.075) | intron     | 2  | 188,861,572 | 189,024,297 |
| 0.014 (0.075) | intron     | 2  | 188,861,572 | 189,024,297 |
| 0.01 (0.212)  | intron     | 2  | 189,024,362 | 189,052,866 |
| 0.086 (0.117) | intron     | 1  | 90,861,908  | 90,861,910  |
| 0.086 (0.117) | exon       | 1  | 90,861,683  | 90,861,908  |
| 0.086 (0.117) | exon       | 1  | 90,861,910  | 90,862,006  |
| 0.108 (0.086) | 3'UTR      | 10 | 45,481,617  | 45,482,421  |
| 0.108 (0.086) | exon       | 10 | 45,481,617  | 45,482,421  |
| 0.03 (0.037)  | intron     | 9  | 46,467,172  | 46,654,691  |
| 0.185 (0.046) | intron     | 19 | 29,168,011  | 29,191,275  |
| 0.015 (0.069) | intron     | 13 | 48,146,379  | 48,292,609  |
| 0.02 (0.114)  | intron     | 16 | 10,475,925  | 10,602,541  |
| 0.035 (0.2)   | intron     | 17 | 12,811,981  | 12,854,073  |
| 0.017 (0.145) | intron     | 3  | 3,893,296   | 3,893,837   |
| 0.03 (0.095)  | intron     | 3  | 430,993     | 579,427     |
| 0.043 (0.141) | upstream   | 13 | 81,795,197  | 81,796,197  |
| 0.017 (0.09)  | downstream | 1  | 165,836,402 | 165,837,402 |
| 0.036 (0.009) | downstream | 2  | 613,895     | 614,895     |
| 0.032 (0.125) | downstream | 20 | 10,204,247  | 10,205,247  |
| 0.014 (0.075) | intron     | 2  | 188,861,069 | 189,028,299 |
| 0.01 (0.212)  | intron     | 2  | 189,028,334 | 189,088,428 |
| 0.016 (0.127) | intron     | 1  | 72,661,541  | 72,987,734  |
| 0.016 (0.127) | intron     | 1  | 72,824,787  | 72,987,777  |
| 0.016 (0.127) | intron     | 1  | 72,932,853  | 72,959,825  |
| 0.027 (0.116) | intron     | 2  | 193,306,924 | 193,314,220 |
| 0.061 (0.1)   | intron     | 4  | 8,943,021   | 8,977,746   |

|               |            |    |             |             |
|---------------|------------|----|-------------|-------------|
| 0.035 (0.063) | intron     | 4  | 8,943,021   | 8,977,746   |
| 0.028 (0.127) | downstream | 17 | 93,271,782  | 93,272,782  |
| 0.061 (0.112) | downstream | 20 | 12,371,390  | 12,372,390  |
| 0.135 (0.083) | upstream   | 5  | 152,235,563 | 152,236,563 |
| 0.223 (0.045) | N/A        |    |             |             |
| 0.122 (0.031) | N/A        |    |             |             |
| 0.058 (0.138) | N/A        |    |             |             |
| 0.064 (0.125) | N/A        |    |             |             |
| 0.170 (0.018) | N/A        |    |             |             |
| 0.073 (0.05)  | N/A        |    |             |             |
| 0.121 (0.044) | N/A        |    |             |             |
| 0.112 (0.023) | N/A        |    |             |             |
| 0.003 (0.032) | N/A        |    |             |             |
| 0.085 (0.015) | N/A        |    |             |             |
| 0.154 (0.023) | N/A        |    |             |             |
| 0.140 (0.061) | N/A        |    |             |             |
| 0.093 (0.039) | N/A        |    |             |             |
| 0.152 (0.011) | N/A        |    |             |             |
| 0.076 (0.035) | N/A        |    |             |             |
| 0.103 (0.020) | N/A        |    |             |             |
| 0.098 (0.5)   | N/A        |    |             |             |
| 0.156 (0.011) | N/A        |    |             |             |
| 0.162 (0.024) | N/A        |    |             |             |
| 0.089 (0.028) | N/A        |    |             |             |
| 0.128 (0.583) | N/A        |    |             |             |
| 0.029 (0.019) | N/A        |    |             |             |
| 0.089 (0.428) | N/A        |    |             |             |
| 0.150 (0.013) | N/A        |    |             |             |
| 0.085 (0.011) | N/A        |    |             |             |
| 0.153 (0.010) | N/A        |    |             |             |
| 0.185 (0.032) | N/A        |    |             |             |
| 0.062 (0.013) | N/A        |    |             |             |
| 0.144 (0.040) | N/A        |    |             |             |
| 0.112 (0.04)  | N/A        |    |             |             |
| 0.022 (0.312) | N/A        |    |             |             |
| 0.193 (0.014) | N/A        |    |             |             |
| 0.022 (0.021) | N/A        |    |             |             |
| 0.023 (0.030) | N/A        |    |             |             |

|               |     |
|---------------|-----|
| 0.061 (0.053) | N/A |
| 0.104 (0.071) | N/A |
| 0.152 (0.036) | N/A |
| 0.069 (0.026) | N/A |
| 0.120 (0.040) | N/A |
| 0.067 (0.052) | N/A |
| 0.170 (0.263) | N/A |
| 0.068 (0.096) | N/A |
| 0.119 (0.039) | N/A |
| 0.072 (0.115) | N/A |
| 0.013 (0.625) | N/A |
| 0.152 (0.388) | N/A |
| 0.161 (0.5)   | N/A |
| 0.117 (0.011) | N/A |
| 0.094 (0.010) | N/A |
| 0.202 (0.057) | N/A |
| 0.191 (0.040) | N/A |
| 0.083 (0.042) | N/A |
| 0.123 (0.040) | N/A |
| 0.111 (0.028) | N/A |
| 0.174 (0.153) | N/A |
| 0.039 (0.5)   | N/A |
| 0.082 (0.022) | N/A |
| 0.144 (0.033) | N/A |
| 0.192 (0.027) | N/A |
| 0.117 (0.036) | N/A |
| 0.137 (0.043) | N/A |
| 0.210 (0.024) | N/A |
| 0.086 (0.212) | N/A |
| 0.101 (0.018) | N/A |
| 0.066 (0.052) | N/A |
| 0.116 (0.019) | N/A |
| 0.129 (0.2)   | N/A |
| 0.146 (0.053) | N/A |
| 0.068 (0.034) | N/A |
| 0.169 (0.014) | N/A |
| 0.159 (0.018) | N/A |
| 0.146 (0.045) | N/A |



|               |     |
|---------------|-----|
| 0.065 (0.014) | N/A |
| 0.072 (0.3)   | N/A |
| 0.087 (0.049) | N/A |
| 0.183 (0.011) | N/A |
| 0.084 (0.050) | N/A |
| 0.149 (0.023) | N/A |
| 0.125 (0.010) | N/A |
| 0.122 (0.022) | N/A |
| 0.114 (0.014) | N/A |
| 0.114 (0.014) | N/A |
| 0.130 (0.015) | N/A |
| 0.027 (0.583) | N/A |
| 0.017 (0.416) | N/A |
| 0.105 (0.014) | N/A |
| 0.083 (0.040) | N/A |
| 0.136 (0.057) | N/A |
| 0.082 (0.072) | N/A |
| 0.122 (0.046) | N/A |
| 0.012 (0.625) | N/A |
| 0.104 (0.042) | N/A |
| 0.032 (0.034) | N/A |
| 0.181 (0.016) | N/A |
| 0.054 (0.017) | N/A |
| 0.066 (0.040) | N/A |
| 0.091 (0.027) | N/A |
| 0.049 (0.020) | N/A |
| 0.088 (0.034) | N/A |
| 0.078 (0.032) | N/A |
| 0.194 (0.5)   | N/A |
| 0.108 (0.018) | N/A |
| 0.069 (0.010) | N/A |
| 0.081 (0.043) | N/A |
| 0.143 (0.011) | N/A |
| 0.117 (0.071) | N/A |
| 0.042 (0.010) | N/A |
| 0.096 (0.053) | N/A |
| 0.087 (0.4)   | N/A |
| 0.077 (0.016) | N/A |

|               |     |
|---------------|-----|
| 0.120 (0.014) | N/A |
| 0.122 (0.028) | N/A |
| 0.125 (0.050) | N/A |
| 0.115 (0.063) | N/A |
| 0.075 (0.086) | N/A |
| 0.065 (0.061) | N/A |
| 0.104 (0.6)   | N/A |
| 0.140 (0.072) | N/A |
| 0.163 (0.037) | N/A |
| 0.104 (0.033) | N/A |
| 0.036 (0.5)   | N/A |
| 0.103 (0.285) | N/A |
| 0.060 (0.013) | N/A |
| 0.174 (0.017) | N/A |
| 0.090 (0.030) | N/A |
| 0.195 (0.1)   | N/A |
| 0.072 (0.039) | N/A |
| 0.137 (0.6)   | N/A |
| 0.111 (0.028) | N/A |
| 0.129 (0.033) | N/A |
| 0.166 (0.022) | N/A |
| 0.100 (0.025) | N/A |
| 0.179 (0.061) | N/A |
| 0.182 (0.018) | N/A |
| 0.118 (0.023) | N/A |
| 0.158 (0.033) | N/A |
| 0.176 (0.013) | N/A |
| 0.111 (0.020) | N/A |
| 0.111 (0.106) | N/A |
| 0.155 (0.018) | N/A |
| 0.129 (0.016) | N/A |
| 0.111 (0.027) | N/A |
| 0.068 (0.562) | N/A |
| 0.045 (0.018) | N/A |
| 0.026 (0.583) | N/A |
| 0.117 (0.054) | N/A |
| 0.107 (0.058) | N/A |
| 0.112 (0.04)  | N/A |

|               |     |
|---------------|-----|
| 0.055 (0.084) | N/A |
| 0.062 (0.027) | N/A |
| 0.073 (0.027) | N/A |
| 0.132 (0.068) | N/A |
| 0.050 (0.583) | N/A |
| 0.086 (0.625) | N/A |
| 0.194 (0.028) | N/A |
| 0.106 (0.043) | N/A |
| 0.113 (0.032) | N/A |
| 0.190 (0.157) | N/A |
| 0.119 (0.012) | N/A |
| 0.087 (0.055) | N/A |
| 0.181 (0.015) | N/A |
| 0.158 (0.080) | N/A |
| 0.161 (0.050) | N/A |
| 0.101 (0.025) | N/A |
| 0.135 (0.010) | N/A |
| 0.167 (0.020) | N/A |
| 0.101 (0.032) | N/A |
| 0.121 (0.029) | N/A |
| 0.086 (0.028) | N/A |
| 0.118 (0.024) | N/A |
| 0.147 (0.454) | N/A |
| 0.136 (0.043) | N/A |
| 0.134 (0.017) | N/A |
| 0.111 (0.020) | N/A |
| 0.115 (0.033) | N/A |
| 0.151 (0.018) | N/A |
| 0.052 (0.021) | N/A |
| 0.082 (0.104) | N/A |
| 0.162 (0.013) | N/A |
| 0.136 (0.037) | N/A |
| 0.052 (0.056) | N/A |
| 0.085 (0.018) | N/A |
| 0.133 (0.032) | N/A |
| 0.079 (0.108) | N/A |
| 0.131 (0.083) | N/A |
| 0.125 (0.036) | N/A |

|               |     |
|---------------|-----|
| 0.101 (0.025) | N/A |
| 0.085 (0.034) | N/A |
| 0.099 (0.065) | N/A |
| 0.174 (0.092) | N/A |
| 0.131 (0.045) | N/A |
| 0.059 (0.058) | N/A |
| 0.165 (0.019) | N/A |
| 0.138 (0.039) | N/A |
| 0.040 (0.029) | N/A |
| 0.051 (0.064) | N/A |
| 0.099 (0.044) | N/A |
| 0.091 (0.025) | N/A |
| 0.024 (0.25)  | N/A |
| 0.133 (0.021) | N/A |
| 0.041 (0.041) | N/A |
| 0.097 (0.077) | N/A |
| 0.008 (0.011) | N/A |
| 0.114 (0.026) | N/A |
| 0.163 (0.022) | N/A |
| 0.166 (0.187) | N/A |
| 0.118 (0.075) | N/A |
| 0.041 (0.018) | N/A |
| 0.045 (0.018) | N/A |
| 0.165 (0.014) | N/A |
| 0.093 (0.024) | N/A |
| 0.143 (0.055) | N/A |
| 0.167 (0.012) | N/A |
| 0.160 (0.012) | N/A |
| 0.179 (0.119) | N/A |
| 0.023 (0.051) | N/A |
| 0.141 (0.048) | N/A |
| 0.159 (0.016) | N/A |
| 0.024 (0.016) | N/A |
| 0.070 (0.010) | N/A |
| 0.008 (0.016) | N/A |
| 0.121 (0.031) | N/A |
| 0.050 (0.3)   | N/A |
| 0.110 (0.086) | N/A |

|               |     |
|---------------|-----|
| 0.072 (0.583) | N/A |
| 0.134 (0.035) | N/A |
| 0.159 (0.024) | N/A |
| 0.091 (0.076) | N/A |
| 0.027 (0.055) | N/A |
| 0.143 (0.073) | N/A |
| 0.161 (0.033) | N/A |
| 0.081 (0.312) | N/A |
| 0.188 (0.030) | N/A |
| 0.120 (0.028) | N/A |
| 0.049 (0.5)   | N/A |
| 0.044 (0.048) | N/A |
| 0.047 (0.344) | N/A |
| 0.130 (0.010) | N/A |
| 0.041 (0.437) | N/A |
| 0.069 (0.016) | N/A |
| 0.118 (0.423) | N/A |
| 0.068 (0.031) | N/A |
| 0.106 (0.022) | N/A |
| 0.105 (0.024) | N/A |
| 0.030 (0.312) | N/A |
| 0.051 (0.056) | N/A |
| 0.123 (0.025) | N/A |
| 0.143 (0.041) | N/A |
| 0.198 (0.048) | N/A |
| 0.137 (0.025) | N/A |
| 0.206 (0.084) | N/A |
| 0.120 (0.562) | N/A |
| 0.084 (0.054) | N/A |
| 0.124 (0.061) | N/A |
| 0.157 (0.5)   | N/A |
| 0.073 (0.625) | N/A |
| 0.139 (0.079) | N/A |
| 0.246 (0.011) | N/A |
| 0.135 (0.010) | N/A |
| 0.042 (0.170) | N/A |
| 0.116 (0.025) | N/A |
| 0.100 (0.055) | N/A |

|               |     |
|---------------|-----|
| 0.002 (0.032) | N/A |
| 0.212 (0.021) | N/A |
| 0.099 (0.027) | N/A |
| 0.163 (0.016) | N/A |
| 0.124 (0.036) | N/A |
| 0.120 (0.022) | N/A |
| 0.102 (0.5)   | N/A |
| 0.108 (0.046) | N/A |
| 0.085 (0.045) | N/A |
| 0.155 (0.035) | N/A |
| 0.022 (0.571) | N/A |
| 0.177 (0.416) | N/A |
| 0.100 (0.057) | N/A |
| 0.092 (0.086) | N/A |
| 0.105 (0.046) | N/A |
| 0.141 (0.011) | N/A |
| 0.122 (0.013) | N/A |
| 0.132 (0.036) | N/A |
| 0.087 (0.030) | N/A |
| 0.153 (0.011) | N/A |
| 0.115 (0.029) | N/A |
| 0.060 (0.028) | N/A |
| 0.187 (0.625) | N/A |
| 0.128 (0.023) | N/A |
| 0.088 (0.068) | N/A |
| 0.051 (0.013) | N/A |
| 0.120 (0.015) | N/A |
| 0.100 (0.103) | N/A |
| 0.166 (0.129) | N/A |
| 0.082 (0.059) | N/A |
| 0.107 (0.032) | N/A |
| 0.182 (0.131) | N/A |
| 0.184 (0.013) | N/A |
| 0.070 (0.017) | N/A |
| 0.038 (0.060) | N/A |
| 0.116 (0.028) | N/A |
| 0.128 (0.043) | N/A |
| 0.192 (0.052) | N/A |

|               |     |
|---------------|-----|
| 0.047 (0.029) | N/A |
| 0.072 (0.583) | N/A |
| 0.069 (0.102) | N/A |
| 0.144 (0.011) | N/A |
| 0.014 (0.026) | N/A |
| 0.128 (0.029) | N/A |
| 0.141 (0.026) | N/A |
| 0.096 (0.047) | N/A |
| 0.068 (0.047) | N/A |
| 0.154 (0.047) | N/A |
| 0.136 (0.033) | N/A |
| 0.105 (0.02)  | N/A |
| 0.009 (0.029) | N/A |
| 0.156 (0.019) | N/A |
| 0.082 (0.025) | N/A |
| 0.136 (0.046) | N/A |
| 0.103 (0.172) | N/A |
| 0.171 (0.04)  | N/A |
| 0.093 (0.045) | N/A |
| 0.037 (0.015) | N/A |
| 0.097 (0.086) | N/A |
| 0.142 (0.021) | N/A |
| 0.109 (0.018) | N/A |
| 0.060 (0.010) | N/A |
| 0.025 (0.5)   | N/A |
| 0.126 (0.011) | N/A |
| 0.067 (0.018) | N/A |
| 0.164 (0.066) | N/A |
| 0.089 (0.091) | N/A |
| 0.100 (0.027) | N/A |
| 0.043 (0.019) | N/A |
| 0.137 (0.014) | N/A |
| 0.067 (0.013) | N/A |
| 0.146 (0.029) | N/A |
| 0.180 (0.010) | N/A |
| 0.121 (0.017) | N/A |
| 0.127 (0.011) | N/A |
| 0.121 (0.263) | N/A |

|               |     |
|---------------|-----|
| 0.246 (0.019) | N/A |
| 0.066 (0.043) | N/A |
| 0.042 (0.112) | N/A |
| 0.209 (0.020) | N/A |
| 0.019 (0.307) | N/A |
| 0.063 (0.011) | N/A |
| 0.111 (0.043) | N/A |
| 0.156 (0.272) | N/A |
| 0.153 (0.010) | N/A |
| 0.033 (0.051) | N/A |
| 0.048 (0.166) | N/A |
| 0.154 (0.6)   | N/A |
| 0.082 (0.036) | N/A |
| 0.117 (0.080) | N/A |
| 0.088 (0.027) | N/A |
| 0.189 (0.013) | N/A |
| 0.047 (0.051) | N/A |
| 0.152 (0.024) | N/A |
| 0.133 (0.029) | N/A |
| 0.078 (0.047) | N/A |
| 0.090 (0.015) | N/A |
| 0.173 (0.333) | N/A |
| 0.086 (0.020) | N/A |
| 0.084 (0.012) | N/A |
| 0.106 (0.030) | N/A |
| 0.104 (0.084) | N/A |
| 0.245 (0.025) | N/A |
| 0.070 (0.5)   | N/A |
| 0.078 (0.016) | N/A |
| 0.071 (0.017) | N/A |
| 0.150 (0.026) | N/A |
| 0.146 (0.127) | N/A |
| 0.137 (0.018) | N/A |
| 0.108 (0.011) | N/A |
| 0.101 (0.023) | N/A |
| 0.060 (0.013) | N/A |
| 0.152 (0.021) | N/A |
| 0.147 (0.275) | N/A |



|               |     |
|---------------|-----|
| 0.149 (0.012) | N/A |
| 0.102 (0.061) | N/A |
| 0.148 (0.018) | N/A |
| 0.141 (0.015) | N/A |
| 0.179 (0.014) | N/A |
| 0.142 (0.030) | N/A |
| 0.049 (0.025) | N/A |
| 0.144 (0.05)  | N/A |
| 0.150 (0.011) | N/A |
| 0.097 (0.25)  | N/A |
| 0.042 (0.086) | N/A |
| 0.146 (0.028) | N/A |
| 0.109 (0.017) | N/A |
| 0.067 (0.5)   | N/A |
| 0.152 (0.5)   | N/A |
| 0.150 (0.333) | N/A |
| 0.171 (0.012) | N/A |
| 0.162 (0.033) | N/A |
| 0.068 (0.043) | N/A |
| 0.078 (0.021) | N/A |
| 0.031 (0.5)   | N/A |
| 0.175 (0.5)   | N/A |
| 0.086 (0.014) | N/A |
| 0.143 (0.312) | N/A |
| 0.165 (0.043) | N/A |
| 0.075 (0.098) | N/A |
| 0.191 (0.011) | N/A |
| 0.116 (0.032) | N/A |
| 0.185 (0.019) | N/A |
| 0.074 (0.159) | N/A |
| 0.139 (0.043) | N/A |
| 0.141 (0.067) | N/A |
| 0.055 (0.031) | N/A |
| 0.196 (0.032) | N/A |
| 0.071 (0.6)   | N/A |
| 0.099 (0.030) | N/A |
| 0.150 (0.031) | N/A |
| 0.366 (0.041) | N/A |

|               |     |
|---------------|-----|
| 0.140 (0.013) | N/A |
| 0.123 (0.023) | N/A |
| 0.127 (0.025) | N/A |
| 0 (0.081)     | N/A |
| 0.113 (0.040) | N/A |
| 0.147 (0.062) | N/A |
| 0.111 (0.039) | N/A |
| 0.093 (0.014) | N/A |
| 0.130 (0.063) | N/A |
| 0.063 (0.014) | N/A |
| 0.160 (0.042) | N/A |
| 0.079 (0.03)  | N/A |
| 0.158 (0.018) | N/A |
| 0.103 (0.025) | N/A |
| 0.074 (0.035) | N/A |
| 0.118 (0.021) | N/A |
| 0.106 (0.020) | N/A |
| 0.090 (0.040) | N/A |
| 0.048 (0.6)   | N/A |
| 0.174 (0.013) | N/A |
| 0.160 (0.034) | N/A |
| 0.119 (0.029) | N/A |
| 0.155 (0.024) | N/A |
| 0.148 (0.017) | N/A |
| 0.098 (0.030) | N/A |
| 0.176 (0.016) | N/A |
| 0.103 (0.039) | N/A |
| 0.146 (0.018) | N/A |
| 0.229 (0.312) | N/A |
| 0.132 (0.014) | N/A |
| 0.136 (0.5)   | N/A |
| 0.187 (0.070) | N/A |
| 0.038 (0.291) | N/A |
| 0.084 (0.084) | N/A |
| 0.088 (0.033) | N/A |
| 0.067 (0.062) | N/A |
| 0.065 (0.025) | N/A |
| 0.063 (0.019) | N/A |

|               |     |
|---------------|-----|
| 0.022 (0.625) | N/A |
| 0.121 (0.020) | N/A |
| 0.157 (0.024) | N/A |
| 0.074 (0.013) | N/A |
| 0.153 (0.05)  | N/A |
| 0.034 (0.075) | N/A |
| 0.192 (0.037) | N/A |
| 0.071 (0.027) | N/A |
| 0.112 (0.060) | N/A |
| 0.146 (0.016) | N/A |
| 0.144 (0.038) | N/A |
| 0.025 (0.071) | N/A |
| 0.183 (0.021) | N/A |
| 0.182 (0.028) | N/A |
| 0.083 (0.025) | N/A |
| 0.176 (0.562) | N/A |
| 0.087 (0.021) | N/A |
| 0.151 (0.042) | N/A |
| 0.162 (0.5)   | N/A |
| 0.042 (0.45)  | N/A |
| 0.174 (0.625) | N/A |
| 0.017 (0.625) | N/A |
| 0.141 (0.019) | N/A |
| 0.177 (0.010) | N/A |
| 0.145 (0.038) | N/A |
| 0.006 (0.062) | N/A |
| 0.043 (0.012) | N/A |
| 0.048 (0.010) | N/A |
| 0.042 (0.020) | N/A |
| 0.086 (0.055) | N/A |
| 0.078 (0.035) | N/A |
| 0.116 (0.5)   | N/A |
| 0.031 (0.015) | N/A |
| 0.145 (0.030) | N/A |
| 0.138 (0.023) | N/A |
| 0.118 (0.021) | N/A |
| 0.173 (0.023) | N/A |
| 0.093 (0.034) | N/A |

|               |     |
|---------------|-----|
| 0.004 (0.059) | N/A |
| 0.128 (0.076) | N/A |
| 0.047 (0.090) | N/A |
| 0.084 (0.069) | N/A |
| 0.142 (0.010) | N/A |
| 0.044 (0.017) | N/A |
| 0.134 (0.5)   | N/A |
| 0.163 (0.015) | N/A |
| 0.089 (0.018) | N/A |
| 0.087 (0.147) | N/A |
| 0.035 (0.437) | N/A |
| 0.130 (0.571) | N/A |
| 0.129 (0.019) | N/A |
| 0.034 (0.571) | N/A |
| 0.189 (0.018) | N/A |
| 0.104 (0.034) | N/A |
| 0.065 (0.022) | N/A |
| 0.145 (0.026) | N/A |
| 0.091 (0.014) | N/A |
| 0.134 (0.026) | N/A |
| 0.123 (0.02)  | N/A |
| 0.086 (0.035) | N/A |
| 0.151 (0.036) | N/A |
| 0.120 (0.011) | N/A |
| 0.078 (0.023) | N/A |
| 0.137 (0.026) | N/A |
| 0.126 (0.016) | N/A |
| 0.054 (0.076) | N/A |
| 0.078 (0.625) | N/A |
| 0.129 (0.017) | N/A |
| 0.128 (0.011) | N/A |
| 0.111 (0.051) | N/A |
| 0.125 (0.016) | N/A |
| 0.090 (0.173) | N/A |
| 0.155 (0.021) | N/A |
| 0.139 (0.050) | N/A |
| 0.049 (0.5)   | N/A |
| 0.083 (0.030) | N/A |

|               |     |
|---------------|-----|
| 0.122 (0.020) | N/A |
| 0.141 (0.026) | N/A |
| 0.020 (0.583) | N/A |
| 0.127 (0.024) | N/A |
| 0.062 (0.069) | N/A |
| 0.180 (0.012) | N/A |
| 0.126 (0.048) | N/A |
| 0.194 (0.012) | N/A |
| 0.051 (0.291) | N/A |
| 0.091 (0.043) | N/A |
| 0.148 (0.068) | N/A |
| 0.029 (0.6)   | N/A |
| 0.060 (0.017) | N/A |
| 0.080 (0.030) | N/A |
| 0.066 (0.625) | N/A |
| 0.138 (0.010) | N/A |
| 0.126 (0.028) | N/A |
| 0.089 (0.086) | N/A |
| 0.181 (0.018) | N/A |
| 0.165 (0.018) | N/A |
| 0.047 (0.625) | N/A |
| 0.170 (0.018) | N/A |
| 0.118 (0.136) | N/A |
| 0.103 (0.037) | N/A |
| 0.085 (0.034) | N/A |
| 0.131 (0.010) | N/A |
| 0.201 (0.026) | N/A |
| 0.175 (0.046) | N/A |
| 0.149 (0.012) | N/A |
| 0.078 (0.3)   | N/A |
| 0.152 (0.583) | N/A |
| 0.164 (0.040) | N/A |
| 0.054 (0.048) | N/A |
| 0.152 (0.037) | N/A |
| 0.095 (0.013) | N/A |
| 0.113 (0.025) | N/A |
| 0.112 (0.016) | N/A |
| 0.077 (0.5)   | N/A |

|               |     |
|---------------|-----|
| 0.127 (0.021) | N/A |
| 0.000 (0.076) | N/A |
| 0.002 (0.416) | N/A |
| 0.112 (0.043) | N/A |
| 0.162 (0.033) | N/A |
| 0.046 (0.040) | N/A |
| 0.161 (0.019) | N/A |
| 0.033 (0.035) | N/A |
| 0.158 (0.036) | N/A |
| 0.034 (0.096) | N/A |
| 0.105 (0.036) | N/A |

---

ig DMRs are identified as those located within +/- 1kbp from the gene bounda

**apping genomic feature**

---

| <i>Strand</i> | <i>Overlap with<br/>DMR (bp)</i> | <i>Overlapping Transcript ID</i> |
|---------------|----------------------------------|----------------------------------|
| -             | 116                              | ENSRNOT00000044178               |
| -             | 16                               | ENSRNOT00000064708               |
| -             | 165                              | ENSRNOT00000068644               |
| -             | 64                               | ENSRNOT00000068327               |
| -             | 285                              | ENSRNOT00000020265               |
| -             | 343                              | ENSRNOT00000033491               |
| -             | 404                              | ENSRNOT00000026481               |
| -             | 21                               | ENSRNOT00000026481               |
| -             | 21                               | ENSRNOT00000026477               |
| -             | 404                              | ENSRNOT00000026477               |
| +             | 57                               | ENSRNOT00000020452               |
| -             | 46                               | ENSRNOT00000018138               |
| -             | 169                              | ENSRNOT00000026962               |
| +             | 51                               | ENSRNOT00000028277               |
| +             | 476                              | ENSRNOT00000028094               |
| -             | 59                               | ENSRNOT00000047200               |
| -             | 43                               | ENSRNOT00000047200               |
| -             | 11                               | ENSRNOT00000051086               |
| +             | 60                               | ENSRNOT00000017601               |
| +             | 284                              | ENSRNOT00000007312               |
| -             | 376                              | ENSRNOT00000004609               |
| +             | 386                              | ENSRNOT00000020230               |
| +             | 144                              | ENSRNOT00000020230               |
| +             | 295                              | ENSRNOT00000051058               |
| +             | 295                              | ENSRNOT00000043981               |
| +             | 392                              | ENSRNOT00000017181               |
| -             | 183                              | ENSRNOT00000068327               |
| +             | 333                              | ENSRNOT00000006832               |
| -             | 113                              | ENSRNOT00000065049               |
| -             | 113                              | ENSRNOT00000008138               |
| -             | 94                               | ENSRNOT00000026477               |
| -             | 94                               | ENSRNOT00000026481               |
| +             | 8                                | ENSRNOT00000057067               |

|   |     |                    |
|---|-----|--------------------|
| + | 157 | ENSRNOT00000058724 |
| + | 157 | ENSRNOT00000019512 |
| + | 157 | ENSRNOT00000019452 |
| - | 348 | ENSRNOT00000016983 |
| - | 686 | ENSRNOT00000016983 |
| - | 44  | ENSRNOT00000016983 |
| + | 259 | ENSRNOT00000014241 |
| + | 259 | ENSRNOT00000014249 |
| + | 246 | ENSRNOT00000066976 |
| + | 246 | ENSRNOT00000038566 |
| + | 246 | ENSRNOT00000065975 |
| - | 631 | ENSRNOT00000061615 |
| - | 631 | ENSRNOT00000011955 |
| + | 176 | ENSRNOT00000020452 |
| - | 145 | ENSRNOT00000018138 |
| + | 120 | ENSRNOT00000027999 |
| + | 197 | ENSRNOT00000009241 |
| + | 197 | ENSRNOT00000048391 |
| - | 584 | ENSRNOT00000022956 |
| - | 615 | ENSRNOT00000022956 |
| - | 615 | ENSRNOT00000068378 |
| - | 584 | ENSRNOT00000068378 |
| - | 164 | ENSRNOT00000068191 |
| - | 164 | ENSRNOT00000023153 |
| + | 123 | ENSRNOT00000048843 |
| - | 16  | ENSRNOT00000057944 |
| - | 16  | ENSRNOT00000017257 |
| - | 16  | ENSRNOT00000067589 |
| + | 94  | ENSRNOT00000028277 |
| + | 424 | ENSRNOT00000068701 |
| + | 424 | ENSRNOT00000028225 |
| - | 338 | ENSRNOT00000005881 |
| - | 138 | ENSRNOT00000064280 |
| - | 138 | ENSRNOT00000024564 |
| - | 597 | ENSRNOT00000047200 |
| - | 15  | ENSRNOT00000051086 |
| - | 166 | ENSRNOT00000051086 |
| - | 192 | ENSRNOT00000018447 |



|   |     |                    |
|---|-----|--------------------|
| + | 10  | ENSRNOT00000064695 |
| + | 418 | ENSRNOT00000064695 |
| - | 12  | ENSRNOT00000038551 |
| - | 412 | ENSRNOT00000014458 |
| - | 596 | ENSRNOT00000061402 |
| - | 596 | ENSRNOT00000008989 |
| + | 8   | ENSRNOT00000002650 |
| + | 440 | ENSRNOT00000021537 |
| + | 440 | ENSRNOT00000067152 |
| + | 168 | ENSRNOT00000061063 |
| + | 348 | ENSRNOT00000031400 |
| - | 165 | ENSRNOT00000036713 |
| - | 165 | ENSRNOT00000000629 |
| - | 325 | ENSRNOT00000033667 |
| - | 325 | ENSRNOT00000009198 |
| - | 328 | ENSRNOT00000067359 |
| - | 81  | ENSRNOT00000068327 |
| - | 328 | ENSRNOT00000002542 |
| - | 377 | ENSRNOT00000020265 |
| - | 229 | ENSRNOT00000016176 |
| - | 172 | ENSRNOT00000055012 |
| - | 144 | ENSRNOT00000053457 |
| + | 189 | ENSRNOT00000028277 |
| - | 21  | ENSRNOT00000047200 |
| - | 37  | ENSRNOT00000026962 |
| + | 476 | ENSRNOT00000028094 |
| - | 64  | ENSRNOT00000068327 |
| - | 91  | ENSRNOT00000020265 |
| + | 8   | ENSRNOT00000028277 |
| - | 24  | ENSRNOT00000033222 |
| - | 24  | ENSRNOT00000038125 |
| - | 24  | ENSRNOT00000033222 |
| - | 224 | ENSRNOT00000033222 |
| - | 224 | ENSRNOT00000038125 |
| - | 24  | ENSRNOT00000038125 |
| + | 210 | ENSRNOT00000064856 |
| + | 210 | ENSRNOT00000016428 |
| - | 269 | ENSRNOT00000065691 |

|   |     |                    |
|---|-----|--------------------|
| - | 269 | ENSRNOT00000066757 |
| - | 269 | ENSRNOT00000064688 |
| - | 269 | ENSRNOT00000026073 |
| + | 34  | ENSRNOT00000024733 |
| + | 862 | ENSRNOT00000018259 |
| - | 51  | ENSRNOT00000005584 |
| - | 66  | ENSRNOT00000023405 |
| - | 130 | ENSRNOT00000008425 |
| + | 239 | ENSRNOT00000063930 |
| - | 18  | ENSRNOT00000013745 |
| - | 112 | ENSRNOT00000013745 |
| + | 16  | ENSRNOT00000010316 |
| - | 166 | ENSRNOT00000059807 |
| - | 166 | ENSRNOT00000003230 |
| + | 322 | ENSRNOT00000034522 |
| + | 322 | ENSRNOT00000055574 |
| + | 322 | ENSRNOT00000014713 |
| - | 191 | ENSRNOT00000045074 |
| - | 191 | ENSRNOT00000016645 |
| + | 335 | ENSRNOT00000027552 |
| + | 44  | ENSRNOT00000019993 |
| + | 44  | ENSRNOT00000064045 |
| + | 208 | ENSRNOT00000024967 |
| - | 71  | ENSRNOT00000055351 |
| - | 219 | ENSRNOT00000029697 |
| - | 71  | ENSRNOT00000029697 |
| - | 219 | ENSRNOT00000055351 |
| - | 219 | ENSRNOT00000002447 |
| - | 219 | ENSRNOT00000002446 |
| - | 219 | ENSRNOT00000049974 |
| + | 673 | ENSRNOT00000058659 |
| + | 673 | ENSRNOT00000008885 |
| - | 845 | ENSRNOT00000020916 |
| - | 845 | ENSRNOT00000020883 |
| - | 24  | ENSRNOT00000002486 |
| + | 238 | ENSRNOT00000042088 |
| + | 286 | ENSRNOT00000042088 |
| - | 16  | ENSRNOT00000016153 |

|   |      |                    |
|---|------|--------------------|
| - | 16   | ENSRNOT00000015894 |
| + | 499  | ENSRNOT00000064010 |
| + | 641  | ENSRNOT00000033405 |
| - | 840  | ENSRNOT00000046539 |
| - | 203  | ENSRNOT00000046539 |
| - | 127  | ENSRNOT00000046539 |
| + | 141  | ENSRNOT00000020690 |
| + | 202  | ENSRNOT00000020690 |
| + | 141  | ENSRNOT00000020690 |
| + | 12   | ENSRNOT00000065824 |
| + | 12   | ENSRNOT00000004119 |
| + | 12   | ENSRNOT00000066243 |
| + | 12   | ENSRNOT00000064999 |
| + | 12   | ENSRNOT00000004187 |
| + | 12   | ENSRNOT00000066344 |
| + | 1156 | ENSRNOT00000052392 |
| - | 12   | ENSRNOT00000039655 |
| - | 12   | ENSRNOT00000042964 |
| - | 12   | ENSRNOT00000013828 |
| - | 539  | ENSRNOT00000044390 |
| - | 539  | ENSRNOT00000026390 |
| - | 539  | ENSRNOT00000026215 |
| + | 408  | ENSRNOT00000065326 |
| + | 188  | ENSRNOT00000048501 |
| + | 408  | ENSRNOT00000048501 |
| + | 370  | ENSRNOT00000065326 |
| + | 78   | ENSRNOT00000046957 |
| + | 40   | ENSRNOT00000046957 |
| + | 205  | ENSRNOT00000046957 |
| + | 85   | ENSRNOT00000046957 |
| + | 277  | ENSRNOT00000019746 |
| + | 277  | ENSRNOT00000054685 |
| + | 277  | ENSRNOT00000054684 |
| + | 150  | ENSRNOT00000015145 |
| + | 150  | ENSRNOT00000015145 |
| + | 547  | ENSRNOT00000010588 |
| - | 390  | ENSRNOT00000036137 |
| + | 30   | ENSRNOT00000042623 |

|   |     |                    |
|---|-----|--------------------|
| + | 30  | ENSRNOT00000057824 |
| + | 30  | ENSRNOT00000046488 |
| + | 30  | ENSRNOT00000050595 |
| - | 16  | ENSRNOT00000015338 |
| + | 131 | ENSRNOT00000054795 |
| + | 131 | ENSRNOT00000066846 |
| + | 168 | ENSRNOT00000003327 |
| - | 445 | ENSRNOT00000066322 |
| + | 111 | ENSRNOT00000031109 |
| + | 248 | ENSRNOT00000068022 |
| + | 248 | ENSRNOT00000064066 |
| + | 248 | ENSRNOT00000049292 |
| + | 248 | ENSRNOT00000066299 |
| + | 115 | ENSRNOT00000037742 |
| + | 109 | ENSRNOT00000010012 |
| + | 28  | ENSRNOT00000051338 |
| + | 28  | ENSRNOT00000023859 |
| - | 14  | ENSRNOT00000035320 |
| + | 307 | ENSRNOT00000017966 |
| + | 131 | ENSRNOT00000017966 |
| + | 172 | ENSRNOT00000017966 |
| + | 10  | ENSRNOT00000020341 |
| + | 149 | ENSRNOT00000040631 |
| - | 267 | ENSRNOT00000016709 |
| - | 229 | ENSRNOT00000016709 |
| - | 186 | ENSRNOT00000011650 |
| + | 251 | ENSRNOT00000013993 |
| + | 101 | ENSRNOT00000001544 |
| - | 169 | ENSRNOT00000038398 |
| - | 477 | ENSRNOT00000001466 |
| - | 22  | ENSRNOT00000054959 |
| - | 12  | ENSRNOT00000034216 |
| + | 541 | ENSRNOT00000023506 |
| - | 403 | ENSRNOT00000062055 |
| - | 403 | ENSRNOT00000062054 |
| - | 403 | ENSRNOT00000014709 |
| - | 403 | ENSRNOT00000062052 |
| + | 199 | ENSRNOT00000001219 |

|   |     |                    |
|---|-----|--------------------|
| + | 584 | ENSRNOT00000049884 |
| + | 129 | ENSRNOT00000020836 |
| + | 56  | ENSRNOT00000067241 |
| + | 56  | ENSRNOT00000066305 |
| + | 56  | ENSRNOT00000028039 |
| + | 89  | ENSRNOT00000010712 |
| + | 89  | ENSRNOT00000010712 |
| - | 73  | ENSRNOT00000020026 |
| - | 73  | ENSRNOT00000040740 |
| - | 862 | ENSRNOT00000031909 |
| + | 296 | ENSRNOT00000008161 |
| - | 184 | ENSRNOT00000060765 |
| - | 184 | ENSRNOT00000008465 |
| - | 184 | ENSRNOT00000065299 |
| - | 184 | ENSRNOT00000060764 |
| - | 272 | ENSRNOT00000025458 |
| - | 272 | ENSRNOT00000067799 |
| + | 8   | ENSRNOT00000067191 |
| + | 8   | ENSRNOT00000068060 |
| + | 8   | ENSRNOT00000014091 |
| + | 131 | ENSRNOT00000040576 |
| + | 55  | ENSRNOT00000040576 |
| + | 99  | ENSRNOT00000026199 |
| + | 43  | ENSRNOT00000026199 |
| - | 176 | ENSRNOT00000035142 |
| - | 983 | ENSRNOT00000001503 |
| - | 378 | ENSRNOT00000017915 |
| - | 103 | ENSRNOT00000038748 |
| - | 306 | ENSRNOT00000017832 |
| + | 39  | ENSRNOT00000026210 |
| + | 50  | ENSRNOT00000026210 |
| + | 39  | ENSRNOT00000026210 |
| - | 432 | ENSRNOT00000001315 |
| + | 241 | ENSRNOT00000001642 |
| + | 161 | ENSRNOT00000010183 |
| - | 437 | ENSRNOT00000006604 |
| - | 593 | ENSRNOT00000044481 |
| - | 593 | ENSRNOT00000042956 |

|   |     |                    |
|---|-----|--------------------|
| - | 355 | ENSRNOT00000018147 |
| - | 360 | ENSRNOT00000011693 |
| - | 360 | ENSRNOT00000049798 |
| - | 360 | ENSRNOT00000064166 |
| + | 340 | ENSRNOT00000064300 |
| + | 340 | ENSRNOT00000001773 |
| + | 340 | ENSRNOT00000001774 |
| + | 340 | ENSRNOT00000041200 |
| + | 340 | ENSRNOT00000001778 |
| - | 8   | ENSRNOT00000026281 |
| + | 42  | ENSRNOT00000012082 |
| + | 14  | ENSRNOT00000038244 |
| + | 547 | ENSRNOT00000040939 |
| + | 547 | ENSRNOT00000027067 |
| - | 95  | ENSRNOT00000041119 |
| + | 316 | ENSRNOT00000058897 |
| + | 66  | ENSRNOT00000015113 |
| - | 56  | ENSRNOT00000007789 |
| - | 318 | ENSRNOT00000017218 |
| - | 318 | ENSRNOT00000048407 |
| - | 318 | ENSRNOT00000067659 |
| + | 154 | ENSRNOT00000059419 |
| + | 674 | ENSRNOT00000059419 |
| + | 154 | ENSRNOT00000059421 |
| + | 674 | ENSRNOT00000059421 |
| - | 54  | ENSRNOT00000024716 |
| + | 130 | ENSRNOT00000014376 |
| + | 130 | ENSRNOT00000014250 |
| + | 586 | ENSRNOT00000047858 |
| + | 586 | ENSRNOT00000044938 |
| + | 586 | ENSRNOT00000046262 |
| + | 586 | ENSRNOT00000018480 |
| - | 10  | ENSRNOT00000054950 |
| - | 10  | ENSRNOT00000067315 |
| - | 10  | ENSRNOT00000033517 |
| - | 10  | ENSRNOT00000033490 |
| + | 72  | ENSRNOT00000055237 |
| + | 72  | ENSRNOT00000055238 |

|   |     |                    |
|---|-----|--------------------|
| + | 72  | ENSRNOT00000055238 |
| + | 72  | ENSRNOT00000055237 |
| + | 52  | ENSRNOT00000056191 |
| + | 52  | ENSRNOT00000066549 |
| + | 52  | ENSRNOT00000015685 |
| - | 344 | ENSRNOT00000068658 |
| - | 16  | ENSRNOT00000005257 |
| - | 72  | ENSRNOT00000044063 |
| - | 72  | ENSRNOT00000058079 |
| - | 111 | ENSRNOT00000019189 |
| - | 111 | ENSRNOT00000019225 |
| + | 181 | ENSRNOT00000028117 |
| - | 358 | ENSRNOT00000029202 |
| + | 274 | ENSRNOT00000061012 |
| + | 274 | ENSRNOT00000061013 |
| - | 179 | ENSRNOT00000021176 |
| + | 146 | ENSRNOT00000024950 |
| + | 146 | ENSRNOT00000066336 |
| + | 571 | ENSRNOT00000037597 |
| + | 268 | ENSRNOT00000020049 |
| + | 268 | ENSRNOT00000019834 |
| + | 268 | ENSRNOT00000046229 |
| + | 134 | ENSRNOT00000051259 |
| + | 36  | ENSRNOT00000051259 |
| - | 194 | ENSRNOT00000068624 |
| - | 194 | ENSRNOT00000068067 |
| - | 194 | ENSRNOT00000065280 |
| - | 12  | ENSRNOT00000039353 |
| - | 439 | ENSRNOT00000021036 |
| - | 169 | ENSRNOT00000002896 |
| + | 91  | ENSRNOT00000066905 |
| + | 91  | ENSRNOT00000006996 |
| + | 91  | ENSRNOT00000056392 |
| - | 254 | ENSRNOT00000018684 |
| + | 141 | ENSRNOT00000057938 |
| + | 57  | ENSRNOT00000057938 |
| - | 30  | ENSRNOT00000023457 |
| - | 557 | ENSRNOT00000058075 |

|   |     |                    |
|---|-----|--------------------|
| - | 557 | ENSRNOT00000032782 |
| + | 515 | ENSRNOT00000015802 |
| + | 74  | ENSRNOT00000044751 |
| + | 74  | ENSRNOT00000000883 |
| + | 154 | ENSRNOT00000040072 |
| + | 154 | ENSRNOT00000064373 |
| - | 171 | ENSRNOT00000034425 |
| - | 317 | ENSRNOT00000022962 |
| - | 42  | ENSRNOT00000021544 |
| - | 89  | ENSRNOT00000056264 |
| - | 89  | ENSRNOT00000056265 |
| - | 77  | ENSRNOT00000056265 |
| - | 77  | ENSRNOT00000056264 |
| - | 342 | ENSRNOT00000010103 |
| - | 449 | ENSRNOT00000042532 |
| - | 449 | ENSRNOT00000061237 |
| + | 912 | ENSRNOT00000015210 |
| + | 85  | ENSRNOT00000036143 |
| + | 75  | ENSRNOT00000036143 |
| + | 5   | ENSRNOT00000036143 |
| + | 247 | ENSRNOT00000005337 |
| + | 227 | ENSRNOT00000020431 |
| + | 227 | ENSRNOT00000058918 |
| - | 157 | ENSRNOT00000019862 |
| - | 29  | ENSRNOT00000019862 |
| + | 222 | ENSRNOT00000067108 |
| + | 222 | ENSRNOT00000007889 |
| - | 144 | ENSRNOT00000026120 |
| - | 71  | ENSRNOT00000055146 |
| - | 630 | ENSRNOT00000055146 |
| - | 71  | ENSRNOT00000025238 |
| - | 71  | ENSRNOT00000025238 |
| - | 630 | ENSRNOT00000025238 |
| - | 71  | ENSRNOT00000055146 |
| + | 542 | ENSRNOT00000036633 |
| + | 50  | ENSRNOT00000036633 |
| - | 124 | ENSRNOT00000055697 |
| - | 124 | ENSRNOT00000057020 |



|   |     |                    |
|---|-----|--------------------|
| - | 124 | ENSRNOT00000058349 |
| - | 357 | ENSRNOT00000002795 |
| - | 357 | ENSRNOT00000060868 |
| - | 91  | ENSRNOT00000007299 |
| + | 214 | ENSRNOT00000015643 |
| + | 214 | ENSRNOT00000064852 |
| - | 275 | ENSRNOT00000038092 |
| - | 492 | ENSRNOT00000044467 |
| - | 278 | ENSRNOT00000040284 |
| - | 97  | ENSRNOT00000038537 |
| - | 97  | ENSRNOT00000040284 |
| - | 278 | ENSRNOT00000038537 |
| + | 523 | ENSRNOT00000066098 |
| + | 523 | ENSRNOT00000013314 |
| + | 523 | ENSRNOT00000067666 |
| + | 704 | ENSRNOT00000001734 |
| + | 359 | ENSRNOT00000001734 |
| + | 134 | ENSRNOT00000065683 |
| + | 134 | ENSRNOT00000001734 |
| - | 56  | ENSRNOT00000001766 |
| - | 271 | ENSRNOT00000001766 |
| - | 596 | ENSRNOT00000001669 |
| - | 596 | ENSRNOT00000001666 |
| - | 84  | ENSRNOT00000016745 |
| + | 276 | ENSRNOT00000016629 |
| + | 211 | ENSRNOT00000016629 |
| - | 176 | ENSRNOT00000064431 |
| + | 340 | ENSRNOT00000022774 |
| + | 205 | ENSRNOT00000022774 |
| - | 228 | ENSRNOT00000049832 |
| - | 540 | ENSRNOT00000057301 |
| - | 418 | ENSRNOT00000057301 |
| - | 540 | ENSRNOT00000049832 |
| - | 183 | ENSRNOT00000057301 |
| - | 183 | ENSRNOT00000049832 |
| - | 228 | ENSRNOT00000057301 |
| - | 418 | ENSRNOT00000049832 |
| + | 218 | ENSRNOT00000028151 |

|   |      |                    |
|---|------|--------------------|
| + | 88   | ENSRNOT00000017831 |
| + | 545  | ENSRNOT00000013602 |
| + | 33   | ENSRNOT00000013602 |
| - | 239  | ENSRNOT00000033358 |
| - | 239  | ENSRNOT00000046143 |
| - | 239  | ENSRNOT00000043170 |
| - | 239  | ENSRNOT00000023352 |
| + | 307  | ENSRNOT00000045288 |
| + | 307  | ENSRNOT00000017907 |
| - | 265  | ENSRNOT00000066186 |
| - | 265  | ENSRNOT00000061967 |
| - | 657  | ENSRNOT00000013385 |
| - | 386  | ENSRNOT00000068037 |
| - | 386  | ENSRNOT00000011812 |
| - | 134  | ENSRNOT00000044431 |
| - | 134  | ENSRNOT00000018556 |
| - | 126  | ENSRNOT00000063877 |
| - | 126  | ENSRNOT00000065670 |
| - | 126  | ENSRNOT00000037017 |
| - | 126  | ENSRNOT00000066643 |
| - | 1771 | ENSRNOT00000009904 |
| - | 18   | ENSRNOT00000046032 |
| - | 18   | ENSRNOT00000014202 |
| + | 13   | ENSRNOT00000055627 |
| + | 13   | ENSRNOT00000055624 |
| + | 13   | ENSRNOT00000055626 |
| + | 13   | ENSRNOT00000003777 |
| + | 13   | ENSRNOT00000068702 |
| + | 13   | ENSRNOT00000055623 |
| + | 13   | ENSRNOT00000055625 |
| + | 487  | ENSRNOT00000025899 |
| + | 487  | ENSRNOT00000025905 |
| + | 487  | ENSRNOT00000025894 |
| - | 359  | ENSRNOT00000001733 |
| - | 573  | ENSRNOT00000016167 |
| - | 285  | ENSRNOT00000013232 |
| - | 285  | ENSRNOT00000057098 |
| - | 285  | ENSRNOT00000049657 |

|   |     |                    |
|---|-----|--------------------|
| - | 125 | ENSRNOT00000065143 |
| - | 125 | ENSRNOT00000064881 |
| + | 459 | ENSRNOT00000000824 |
| - | 184 | ENSRNOT00000014772 |
| - | 157 | ENSRNOT00000034519 |
| - | 72  | ENSRNOT00000042253 |
| - | 72  | ENSRNOT00000029001 |
| - | 205 | ENSRNOT00000020749 |
| - | 200 | ENSRNOT00000001485 |
| + | 121 | ENSRNOT00000014271 |
| - | 199 | ENSRNOT00000002916 |
| - | 12  | ENSRNOT00000002916 |
| - | 77  | ENSRNOT00000002916 |
| - | 135 | ENSRNOT00000002916 |
| - | 14  | ENSRNOT00000041566 |
| - | 14  | ENSRNOT00000021268 |
| - | 191 | ENSRNOT00000052035 |
| - | 14  | ENSRNOT00000028222 |
| - | 402 | ENSRNOT00000034151 |
| - | 503 | ENSRNOT00000034151 |
| - | 503 | ENSRNOT00000060186 |
| - | 402 | ENSRNOT00000060186 |
| - | 392 | ENSRNOT00000035400 |
| + | 705 | ENSRNOT00000055511 |
| + | 705 | ENSRNOT00000055512 |
| + | 705 | ENSRNOT00000024443 |
| - | 250 | ENSRNOT00000042418 |
| + | 314 | ENSRNOT00000057473 |
| + | 314 | ENSRNOT00000060222 |
| + | 408 | ENSRNOT00000050449 |
| + | 408 | ENSRNOT00000043875 |
| + | 408 | ENSRNOT00000051121 |
| + | 408 | ENSRNOT00000039382 |
| + | 408 | ENSRNOT00000045335 |
| + | 112 | ENSRNOT00000000737 |
| + | 16  | ENSRNOT00000022764 |
| + | 16  | ENSRNOT00000067318 |
| + | 415 | ENSRNOT00000042575 |

|   |     |                    |
|---|-----|--------------------|
| + | 415 | ENSRNOT00000060641 |
| + | 415 | ENSRNOT00000010219 |
| + | 514 | ENSRNOT00000011237 |
| + | 8   | ENSRNOT00000035338 |
| - | 273 | ENSRNOT00000021954 |
| + | 10  | ENSRNOT00000038688 |
| + | 10  | ENSRNOT00000040778 |
| - | 44  | ENSRNOT00000065043 |
| - | 44  | ENSRNOT00000021637 |
| + | 138 | ENSRNOT00000006986 |
| + | 641 | ENSRNOT00000056469 |
| + | 641 | ENSRNOT00000009222 |
| - | 236 | ENSRNOT00000043660 |
| + | 250 | ENSRNOT00000025000 |
| + | 250 | ENSRNOT00000025090 |
| + | 657 | ENSRNOT00000013535 |
| - | 561 | ENSRNOT00000065888 |
| - | 561 | ENSRNOT00000031274 |
| - | 561 | ENSRNOT00000031266 |
| - | 561 | ENSRNOT00000066696 |
| - | 561 | ENSRNOT00000031252 |
| + | 334 | ENSRNOT00000016797 |
| + | 334 | ENSRNOT00000059146 |
| + | 334 | ENSRNOT00000060206 |
| + | 154 | ENSRNOT00000051422 |
| + | 154 | ENSRNOT00000028265 |
| + | 212 | ENSRNOT00000023017 |
| + | 574 | ENSRNOT00000023017 |
| - | 395 | ENSRNOT00000064705 |
| - | 131 | ENSRNOT00000067426 |
| - | 131 | ENSRNOT00000016659 |
| - | 395 | ENSRNOT00000067426 |
| - | 131 | ENSRNOT00000064705 |
| - | 131 | ENSRNOT00000066811 |
| - | 131 | ENSRNOT00000064896 |
| - | 131 | ENSRNOT00000067426 |
| - | 395 | ENSRNOT00000064896 |
| - | 395 | ENSRNOT00000066811 |

|   |     |                    |
|---|-----|--------------------|
| - | 395 | ENSRNOT00000016659 |
| - | 395 | ENSRNOT00000045519 |
| - | 131 | ENSRNOT00000045519 |
| - | 48  | ENSRNOT00000065473 |
| - | 48  | ENSRNOT00000017968 |
| - | 450 | ENSRNOT00000022820 |
| + | 222 | ENSRNOT00000066832 |
| + | 222 | ENSRNOT00000037246 |
| + | 66  | ENSRNOT00000063893 |
| + | 66  | ENSRNOT00000013809 |
| + | 150 | ENSRNOT00000044049 |
| + | 150 | ENSRNOT00000044049 |
| - | 72  | ENSRNOT00000056366 |
| - | 72  | ENSRNOT00000015938 |
| - | 244 | ENSRNOT00000002330 |
| - | 244 | ENSRNOT00000002330 |
| - | 393 | ENSRNOT00000002330 |
| - | 22  | ENSRNOT00000054970 |
| - | 12  | ENSRNOT00000003694 |
| - | 12  | ENSRNOT00000067921 |
| - | 12  | ENSRNOT00000032105 |
| - | 12  | ENSRNOT00000068563 |
| - | 10  | ENSRNOT00000039049 |
| + | 10  | ENSRNOT00000019923 |
| - | 188 | ENSRNOT00000010017 |
| - | 188 | ENSRNOT00000010827 |
| - | 379 | ENSRNOT00000024030 |
| + | 402 | ENSRNOT00000017374 |
| + | 240 | ENSRNOT00000001248 |
| - | 256 | ENSRNOT00000061821 |
| - | 256 | ENSRNOT00000001384 |
| + | 525 | ENSRNOT00000043784 |
| + | 399 | ENSRNOT00000067742 |
| + | 399 | ENSRNOT00000054933 |
| + | 35  | ENSRNOT00000067742 |
| + | 35  | ENSRNOT00000054933 |
| - | 10  | ENSRNOT00000025013 |
| - | 10  | ENSRNOT00000024981 |

|   |     |                    |
|---|-----|--------------------|
| - | 264 | ENSRNOT00000051360 |
| + | 324 | ENSRNOT00000025711 |
| - | 197 | ENSRNOT00000011085 |
| + | 382 | ENSRNOT00000000733 |
| + | 382 | ENSRNOT00000000732 |
| - | 34  | ENSRNOT00000032290 |
| - | 66  | ENSRNOT00000067135 |
| - | 66  | ENSRNOT00000003196 |
| + | 356 | ENSRNOT00000039377 |
| - | 8   | ENSRNOT00000043666 |
| + | 286 | ENSRNOT00000068829 |
| + | 12  | ENSRNOT00000024334 |
| + | 12  | ENSRNOT00000067508 |
| + | 131 | ENSRNOT00000012111 |
| + | 14  | ENSRNOT00000012111 |
| - | 147 | ENSRNOT00000063902 |
| - | 147 | ENSRNOT00000004097 |
| - | 147 | ENSRNOT00000065286 |
| - | 149 | ENSRNOT00000046523 |
| - | 149 | ENSRNOT00000037539 |
| - | 149 | ENSRNOT00000029196 |
| - | 149 | ENSRNOT00000067594 |
| - | 171 | ENSRNOT00000048712 |
| - | 26  | ENSRNOT00000048712 |
| - | 171 | ENSRNOT00000025461 |
| - | 171 | ENSRNOT00000042145 |
| - | 26  | ENSRNOT00000042145 |
| - | 26  | ENSRNOT00000025461 |
| - | 26  | ENSRNOT00000066498 |
| - | 14  | ENSRNOT00000031172 |
| - | 83  | ENSRNOT00000044012 |
| - | 83  | ENSRNOT00000013355 |
| - | 83  | ENSRNOT00000013621 |
| - | 36  | ENSRNOT00000065515 |
| - | 36  | ENSRNOT00000008301 |
| - | 36  | ENSRNOT00000050355 |
| - | 36  | ENSRNOT00000064338 |
| - | 36  | ENSRNOT00000045862 |

|   |     |                    |
|---|-----|--------------------|
| - | 117 | ENSRNOT00000064338 |
| - | 139 | ENSRNOT00000045862 |
| - | 117 | ENSRNOT00000050355 |
| - | 117 | ENSRNOT00000008301 |
| - | 139 | ENSRNOT00000008301 |
| - | 139 | ENSRNOT00000064338 |
| - | 139 | ENSRNOT00000050355 |
| - | 139 | ENSRNOT00000065515 |
| - | 117 | ENSRNOT00000045862 |
| - | 117 | ENSRNOT00000065515 |
| - | 563 | ENSRNOT00000055194 |
| - | 58  | ENSRNOT00000022356 |
| - | 58  | ENSRNOT00000068174 |
| - | 58  | ENSRNOT00000067899 |
| - | 403 | ENSRNOT00000012640 |
| - | 41  | ENSRNOT00000012640 |
| - | 560 | ENSRNOT00000049699 |
| - | 560 | ENSRNOT00000040559 |
| - | 560 | ENSRNOT00000044778 |
| - | 188 | ENSRNOT00000017967 |
| + | 544 | ENSRNOT00000049486 |
| + | 544 | ENSRNOT00000021758 |
| + | 169 | ENSRNOT00000056430 |
| + | 544 | ENSRNOT00000056430 |
| + | 169 | ENSRNOT00000021758 |
| + | 169 | ENSRNOT00000049486 |
| - | 296 | ENSRNOT00000026540 |
| - | 296 | ENSRNOT00000046708 |
| - | 142 | ENSRNOT00000046708 |
| - | 142 | ENSRNOT00000026540 |
| + | 10  | ENSRNOT00000011822 |
| + | 10  | ENSRNOT00000057407 |
| + | 10  | ENSRNOT00000011717 |
| + | 56  | ENSRNOT00000019157 |
| - | 219 | ENSRNOT00000024932 |
| - | 219 | ENSRNOT00000045629 |
| - | 132 | ENSRNOT00000024932 |
| - | 132 | ENSRNOT00000045629 |

|   |     |                    |
|---|-----|--------------------|
| - | 536 | ENSRNOT00000031925 |
| - | 164 | ENSRNOT00000052121 |
| - | 164 | ENSRNOT00000019465 |
| + | 226 | ENSRNOT00000019231 |
| + | 226 | ENSRNOT00000067616 |
| - | 72  | ENSRNOT00000055523 |
| - | 218 | ENSRNOT00000021193 |
| - | 218 | ENSRNOT00000055523 |
| - | 72  | ENSRNOT00000021193 |
| + | 298 | ENSRNOT00000010002 |
| + | 298 | ENSRNOT00000066151 |
| + | 298 | ENSRNOT00000010308 |
| + | 269 | ENSRNOT00000011565 |
| + | 159 | ENSRNOT00000064366 |
| + | 159 | ENSRNOT00000065397 |
| + | 159 | ENSRNOT00000019673 |
| - | 148 | ENSRNOT00000002460 |
| - | 148 | ENSRNOT00000032767 |
| - | 148 | ENSRNOT00000040645 |
| - | 148 | ENSRNOT00000064443 |
| - | 64  | ENSRNOT00000056779 |
| - | 61  | ENSRNOT00000056779 |
| - | 18  | ENSRNOT00000056779 |
| - | 166 | ENSRNOT00000005306 |
| - | 4   | ENSRNOT00000056779 |
| - | 19  | ENSRNOT00000056779 |
| - | 28  | ENSRNOT00000057950 |
| + | 82  | ENSRNOT00000001507 |
| + | 101 | ENSRNOT00000001559 |
| + | 326 | ENSRNOT00000001559 |
| + | 90  | ENSRNOT00000045375 |
| - | 272 | ENSRNOT00000002206 |
| - | 28  | ENSRNOT00000002262 |
| - | 28  | ENSRNOT00000066940 |
| - | 12  | ENSRNOT00000005067 |
| + | 208 | ENSRNOT00000065321 |
| + | 208 | ENSRNOT00000006264 |
| - | 224 | ENSRNOT00000006716 |



|   |     |                    |
|---|-----|--------------------|
| - | 224 | ENSRNOT00000066904 |
| - | 774 | ENSRNOT00000058962 |
| - | 336 | ENSRNOT00000064182 |
| - | 774 | ENSRNOT00000065151 |
| - | 774 | ENSRNOT00000064182 |
| - | 336 | ENSRNOT00000065151 |
| - | 336 | ENSRNOT00000058962 |
| + | 249 | ENSRNOT00000006652 |
| + | 27  | ENSRNOT00000006652 |
| + | 249 | ENSRNOT00000006652 |
| - | 106 | ENSRNOT00000007233 |
| - | 186 | ENSRNOT00000008414 |
| + | 183 | ENSRNOT00000049597 |
| + | 183 | ENSRNOT00000040097 |
| + | 2   | ENSRNOT00000009102 |
| + | 344 | ENSRNOT00000009102 |
| - | 135 | ENSRNOT00000009514 |
| - | 135 | ENSRNOT00000009542 |
| - | 135 | ENSRNOT00000066187 |
| - | 10  | ENSRNOT00000009656 |
| + | 74  | ENSRNOT00000046801 |
| + | 227 | ENSRNOT00000009987 |
| - | 34  | ENSRNOT00000010427 |
| - | 203 | ENSRNOT00000011061 |
| + | 28  | ENSRNOT00000012169 |
| + | 28  | ENSRNOT00000012153 |
| + | 28  | ENSRNOT00000066645 |
| + | 28  | ENSRNOT00000061228 |
| + | 115 | ENSRNOT00000060556 |
| - | 8   | ENSRNOT00000011697 |
| + | 156 | ENSRNOT00000013152 |
| - | 222 | ENSRNOT00000059892 |
| - | 222 | ENSRNOT00000014977 |
| + | 271 | ENSRNOT00000015271 |
| + | 601 | ENSRNOT00000015271 |
| - | 587 | ENSRNOT00000064769 |
| - | 587 | ENSRNOT00000016070 |
| - | 587 | ENSRNOT00000064689 |

|   |     |                    |
|---|-----|--------------------|
| - | 587 | ENSRNOT00000015988 |
| + | 255 | ENSRNOT00000016252 |
| + | 255 | ENSRNOT00000051737 |
| - | 14  | ENSRNOT00000016558 |
| - | 99  | ENSRNOT00000017103 |
| - | 226 | ENSRNOT00000017103 |
| - | 119 | ENSRNOT00000055113 |
| - | 119 | ENSRNOT00000017414 |
| - | 119 | ENSRNOT00000055111 |
| - | 119 | ENSRNOT00000055112 |
| - | 119 | ENSRNOT00000064976 |
| - | 618 | ENSRNOT00000066692 |
| - | 618 | ENSRNOT00000018094 |
| - | 618 | ENSRNOT00000067721 |
| - | 618 | ENSRNOT00000029628 |
| - | 618 | ENSRNOT00000067293 |
| - | 618 | ENSRNOT00000029640 |
| - | 618 | ENSRNOT00000040781 |
| - | 303 | ENSRNOT00000041125 |
| + | 332 | ENSRNOT00000020513 |
| + | 332 | ENSRNOT00000052015 |
| - | 48  | ENSRNOT00000020332 |
| - | 173 | ENSRNOT00000021961 |
| - | 166 | ENSRNOT00000065207 |
| - | 166 | ENSRNOT00000022289 |
| - | 166 | ENSRNOT00000022253 |
| - | 166 | ENSRNOT00000022331 |
| - | 166 | ENSRNOT00000068183 |
| - | 166 | ENSRNOT00000065448 |
| - | 227 | ENSRNOT00000022076 |
| - | 106 | ENSRNOT00000064714 |
| - | 106 | ENSRNOT00000022742 |
| - | 106 | ENSRNOT00000067202 |
| - | 195 | ENSRNOT00000045535 |
| - | 186 | ENSRNOT00000022481 |
| - | 186 | ENSRNOT00000064845 |
| - | 195 | ENSRNOT00000022481 |
| - | 186 | ENSRNOT00000045535 |

|   |     |                    |
|---|-----|--------------------|
| - | 195 | ENSRNOT00000064845 |
| - | 22  | ENSRNOT00000022481 |
| - | 22  | ENSRNOT00000045535 |
| - | 403 | ENSRNOT00000048394 |
| - | 22  | ENSRNOT00000064845 |
| - | 240 | ENSRNOT00000066320 |
| - | 240 | ENSRNOT00000065005 |
| + | 681 | ENSRNOT00000022744 |
| - | 118 | ENSRNOT00000023869 |
| - | 28  | ENSRNOT00000023869 |
| - | 260 | ENSRNOT00000025106 |
| - | 260 | ENSRNOT00000066120 |
| - | 260 | ENSRNOT00000055498 |
| - | 352 | ENSRNOT00000025377 |
| - | 212 | ENSRNOT00000025488 |
| + | 334 | ENSRNOT00000026607 |
| + | 60  | ENSRNOT00000027337 |
| + | 60  | ENSRNOT00000063959 |
| + | 60  | ENSRNOT00000027304 |
| + | 461 | ENSRNOT00000027875 |
| + | 461 | ENSRNOT00000027871 |
| - | 245 | ENSRNOT00000028745 |
| + | 363 | ENSRNOT00000037606 |
| - | 12  | ENSRNOT00000050812 |
| - | 39  | ENSRNOT00000050812 |
| - | 10  | ENSRNOT00000030847 |
| - | 182 | ENSRNOT00000039555 |
| + | 326 | ENSRNOT00000035049 |
| - | 58  | ENSRNOT00000060968 |
| - | 176 | ENSRNOT00000030543 |
| - | 290 | ENSRNOT00000068003 |
| - | 56  | ENSRNOT00000030543 |
| - | 58  | ENSRNOT00000030543 |
| - | 56  | ENSRNOT00000060968 |
| - | 176 | ENSRNOT00000060968 |
| + | 14  | ENSRNOT00000041301 |
| + | 33  | ENSRNOT00000032116 |
| + | 123 | ENSRNOT00000032116 |

|   |     |                    |
|---|-----|--------------------|
| - | 374 | ENSRNOT00000037527 |
| - | 200 | ENSRNOT00000033090 |
| + | 33  | ENSRNOT00000035916 |
| + | 84  | ENSRNOT00000035916 |
| + | 250 | ENSRNOT00000035916 |
| + | 33  | ENSRNOT00000035916 |
| + | 194 | ENSRNOT00000033352 |
| - | 73  | ENSRNOT00000030341 |
| + | 240 | ENSRNOT00000032733 |
| - | 44  | ENSRNOT00000046190 |
| + | 10  | ENSRNOT00000051275 |
| + | 358 | ENSRNOT00000048023 |
| + | 298 | ENSRNOT00000048023 |
| - | 229 | ENSRNOT00000047198 |
| - | 12  | ENSRNOT00000047321 |
| - | 12  | ENSRNOT00000045773 |
| - | 61  | ENSRNOT00000063800 |
| - | 61  | ENSRNOT00000051739 |
| + | 348 | ENSRNOT00000051363 |
| + | 279 | ENSRNOT00000047563 |
| + | 257 | ENSRNOT00000056411 |
| + | 10  | ENSRNOT00000041804 |
| - | 13  | ENSRNOT00000041400 |
| - | 12  | ENSRNOT00000041400 |
| - | 132 | ENSRNOT00000041400 |
| - | 559 | ENSRNOT00000041400 |
| - | 168 | ENSRNOT00000041400 |
| + | 125 | ENSRNOT00000044742 |
| + | 60  | ENSRNOT00000041562 |
| + | 605 | ENSRNOT00000041562 |
| + | 120 | ENSRNOT00000041562 |
| + | 86  | ENSRNOT00000041562 |
| + | 183 | ENSRNOT00000041562 |
| - | 119 | ENSRNOT00000041621 |
| - | 67  | ENSRNOT00000044101 |
| - | 4   | ENSRNOT00000044101 |
| - | 83  | ENSRNOT00000044101 |
| - | 25  | ENSRNOT00000044101 |

|   |      |                    |
|---|------|--------------------|
| - | 76   | ENSRNOT00000044101 |
| - | 37   | ENSRNOT00000044101 |
| - | 136  | ENSRNOT00000045096 |
| - | 329  | ENSRNOT00000052466 |
| + | 100  | ENSRNOT00000053436 |
| + | 37   | ENSRNOT00000053436 |
| + | 37   | ENSRNOT00000053436 |
| + | 186  | ENSRNOT00000054626 |
| - | 273  | ENSRNOT00000055537 |
| + | 108  | ENSRNOT00000030805 |
| + | 52   | ENSRNOT00000056189 |
| - | 588  | ENSRNOT00000048323 |
| - | 2528 | ENSRNOT00000039881 |
| - | 2528 | ENSRNOT00000048323 |
| - | 588  | ENSRNOT00000039881 |
| - | 2    | ENSRNOT00000056545 |
| - | 21   | ENSRNOT00000056545 |
| - | 35   | ENSRNOT00000056545 |
| - | 65   | ENSRNOT00000058362 |
| - | 65   | ENSRNOT00000058362 |
| + | 164  | ENSRNOT00000044620 |
| - | 27   | ENSRNOT00000059896 |
| - | 325  | ENSRNOT00000047460 |
| + | 253  | ENSRNOT00000060766 |
| + | 171  | ENSRNOT00000061184 |
| - | 345  | ENSRNOT00000061847 |
| - | 2092 | ENSRNOT00000062085 |
| + | 138  | ENSRNOT00000062668 |
| + | 352  | ENSRNOT00000063224 |
| + | 248  | ENSRNOT00000063309 |
| + | 155  | ENSRNOT00000063363 |
| - | 2528 | ENSRNOT00000068767 |
| - | 588  | ENSRNOT00000068767 |
| - | 438  | ENSRNOT00000036574 |
| - | 438  | ENSRNOT00000068611 |
| - | 438  | ENSRNOT00000066225 |
| - | 184  | ENSRNOT00000068511 |
| + | 99   | ENSRNOT00000065039 |

|   |     |                    |
|---|-----|--------------------|
| + | 226 | ENSRNOT00000065039 |
| + | 211 | ENSRNOT00000064004 |
| + | 98  | ENSRNOT00000070178 |
| - | 52  | ENSRNOT00000070402 |

































---

ries (Rat Genome RN4)

**Overlapping gene**

| <i>Overlapping Gene ID</i> | <i>Gene symbol (RN4)</i> | <i>Gene description (RN4)</i>   |
|----------------------------|--------------------------|---------------------------------|
| ENSRNOG00000003276         | <i>Myo1d</i>             | Myosin-IId                      |
| ENSRNOG00000028149         | <i>LOC367289</i>         | Uncharacterized protein         |
| ENSRNOG00000000522         | <i>Cpne5</i>             | copine-5                        |
| ENSRNOG00000001861         | <i>YdjC</i>              | YdjC homolog                    |
| ENSRNOG00000015078         | <i>Ifitm3</i>            | Interferon-induced transmembra  |
| ENSRNOG00000026857         | <i>Kif7</i>              | Uncharacterized protein         |
| ENSRNOG00000019451         | <i>Smtn</i>              | smoothelin                      |
| ENSRNOG00000019451         | <i>Smtn</i>              | smoothelin                      |
| ENSRNOG00000019451         | <i>Smtn</i>              | smoothelin                      |
| ENSRNOG00000019451         | <i>Smtn</i>              | smoothelin                      |
| ENSRNOG00000015089         | <i>Mcoln2</i>            | mucolipin-2                     |
| ENSRNOG00000040109         | <i>Trem1</i>             | trem-like transcript 1 protein  |
| ENSRNOG00000019902         | <i>Folr1</i>             | folate receptor alpha           |
| ENSRNOG00000020837         | <i>D4A4H1_RAT</i>        | Uncharacterized protein         |
| ENSRNOG00000020702         | <i>Cybasc3</i>           | Cytochrome b ascorbate-depende  |
| ENSRNOG00000033110         | <i>Svep1</i>             | Sushi                           |
| ENSRNOG00000033110         | <i>Svep1</i>             | Sushi                           |
| ENSRNOG00000013552         | <i>Scd1</i>              | Acyl-CoA desaturase 1           |
| ENSRNOG00000013190         | <i>Rnaset2</i>           | ribonuclease T2                 |
| ENSRNOG00000005515         | <i>Rhbdl3</i>            | rhomboid-related protein 3      |
| ENSRNOG00000003276         | <i>Myo1d</i>             | Myosin-IId                      |
| ENSRNOG00000015024         | <i>E9PT54_RAT</i>        | mucolipin-3                     |
| ENSRNOG00000015024         | <i>E9PT54_RAT</i>        | mucolipin-3                     |
| ENSRNOG00000013615         | <i>Dntt</i>              | DNA nucleotidylexotransferase   |
| ENSRNOG00000013615         | <i>Dntt</i>              | DNA nucleotidylexotransferase   |
| ENSRNOG00000012886         | <i>Maff</i>              | transcription factor MafF       |
| ENSRNOG00000001861         | <i>YdjC</i>              | YdjC homolog                    |
| ENSRNOG00000005124         | <i>Plekhh2</i>           | pleckstrin homology domain-cont |
| ENSRNOG00000005291         | <i>Slc38a1</i>           | Sodium-coupled neutral amino ac |
| ENSRNOG00000005291         | <i>Slc38a1</i>           | Sodium-coupled neutral amino ac |
| ENSRNOG00000019451         | <i>Smtn</i>              | smoothelin                      |
| ENSRNOG00000019451         | <i>Smtn</i>              | smoothelin                      |
| ENSRNOG00000037621         | <i>RGD1309870</i>        | --                              |

|                    |                   |                                   |
|--------------------|-------------------|-----------------------------------|
| ENSRNOG00000014104 | <i>Myo5b</i>      | Myosin-Vb                         |
| ENSRNOG00000014104 | <i>Myo5b</i>      | Myosin-Vb                         |
| ENSRNOG00000014104 | <i>Myo5b</i>      | Myosin-Vb                         |
| ENSRNOG00000012531 | <i>Ephb2</i>      | ephrin type-B receptor 2          |
| ENSRNOG00000012531 | <i>Ephb2</i>      | ephrin type-B receptor 2          |
| ENSRNOG00000012531 | <i>Ephb2</i>      | ephrin type-B receptor 2          |
| ENSRNOG00000010378 | <i>Slc4a5</i>     | Electrogenic sodium bicarbonate   |
| ENSRNOG00000010378 | <i>Slc4a5</i>     | Electrogenic sodium bicarbonate   |
| ENSRNOG00000021840 | <i>LOC500046</i>  | Uncharacterized protein           |
| ENSRNOG00000021840 | <i>LOC500046</i>  | Uncharacterized protein           |
| ENSRNOG00000021840 | <i>LOC500046</i>  | Uncharacterized protein           |
| ENSRNOG00000008990 | <i>F1LZQ6_RAT</i> | Angiotensin-like 1 (Predicted)Unc |
| ENSRNOG00000008990 | <i>F1LZQ6_RAT</i> | Angiotensin-like 1 (Predicted)Unc |
| ENSRNOG00000015089 | <i>Mcoln2</i>     | mucolin-2                         |
| ENSRNOG00000040109 | <i>Trem1</i>      | trem-like transcript 1 protein    |
| ENSRNOG00000020624 | <i>Acadsb</i>     | Short/branched chain specific acy |
| ENSRNOG00000006963 | <i>Ctse</i>       | Cathepsin E                       |
| ENSRNOG00000006963 | <i>Ctse</i>       | Cathepsin E                       |
| ENSRNOG00000017087 | <i>Man1c1</i>     | mannosyl-oligosaccharide 1        |
| ENSRNOG00000017087 | <i>Man1c1</i>     | mannosyl-oligosaccharide 1        |
| ENSRNOG00000017087 | <i>Man1c1</i>     | mannosyl-oligosaccharide 1        |
| ENSRNOG00000017087 | <i>Man1c1</i>     | mannosyl-oligosaccharide 1        |
| ENSRNOG00000017202 | <i>Gcom1</i>      | GRINL1A complex locus protein 1   |
| ENSRNOG00000017202 | <i>Gcom1</i>      | GRINL1A complex locus protein 1   |
| ENSRNOG00000014969 | <i>Lzts2</i>      | Leucine zipper putative tumor sup |
| ENSRNOG00000028149 | <i>LOC367289</i>  | Uncharacterized protein           |
| ENSRNOG00000028149 | <i>LOC367289</i>  | Uncharacterized protein           |
| ENSRNOG00000028149 | <i>LOC367289</i>  | Uncharacterized protein           |
| ENSRNOG00000020837 | <i>D4A4H1_RAT</i> | Uncharacterized protein           |
| ENSRNOG00000020797 | <i>D3ZSK0_RAT</i> | Uncharacterized protein           |
| ENSRNOG00000020797 | <i>D3ZSK0_RAT</i> | Uncharacterized protein           |
| ENSRNOG00000004458 | <i>Ston2</i>      | stonin-2                          |
| ENSRNOG00000018126 | <i>F1LNL3_RAT</i> | ATP-binding cassette sub-family A |
| ENSRNOG00000018126 | <i>F1LNL3_RAT</i> | ATP-binding cassette sub-family A |
| ENSRNOG00000033110 | <i>Svep1</i>      | Sushi                             |
| ENSRNOG00000013552 | <i>Scd1</i>       | Acyl-CoA desaturase 1             |
| ENSRNOG00000013552 | <i>Scd1</i>       | Acyl-CoA desaturase 1             |
| ENSRNOG00000013552 | <i>Scd1</i>       | Acyl-CoA desaturase 1             |

|                    |                   |                                  |
|--------------------|-------------------|----------------------------------|
| ENSRNOG00000010131 | <i>Rin2</i>       | ras and Rab interactor 2         |
| ENSRNOG00000010131 | <i>Rin2</i>       | ras and Rab interactor 2         |
| ENSRNOG00000027841 | <i>D3ZGN7_RAT</i> | Uncharacterized protein          |
| ENSRNOG00000010873 | <i>RGD1308048</i> | Uncharacterized protein          |
| ENSRNOG00000006649 | <i>Thrb</i>       | Thyroid hormone receptor beta    |
| ENSRNOG00000006649 | <i>Thrb</i>       | Thyroid hormone receptor beta    |
| ENSRNOG00000001931 | <i>Fgf12</i>      | Fibroblast growth factor 12      |
| ENSRNOG00000016038 | <i>Mgmt</i>       | Methylated-DNA--protein-cystein  |
| ENSRNOG00000016038 | <i>Mgmt</i>       | Methylated-DNA--protein-cystein  |
| ENSRNOG00000019656 | <i>Btd</i>        | Biotinidase                      |
| ENSRNOG00000028344 | <i>Mmp11</i>      | Stromelysin-3                    |
| ENSRNOG00000000522 | <i>Cpne5</i>      | copine-5                         |
| ENSRNOG00000000522 | <i>Cpne5</i>      | copine-5                         |
| ENSRNOG00000006720 | <i>Rnpep</i>      | Aminopeptidase B                 |
| ENSRNOG00000006720 | <i>Rnpep</i>      | Aminopeptidase B                 |
| ENSRNOG00000001861 | <i>YdjC</i>       | YdjC homolog                     |
| ENSRNOG00000001861 | <i>YdjC</i>       | YdjC homolog                     |
| ENSRNOG00000001861 | <i>YdjC</i>       | YdjC homolog                     |
| ENSRNOG00000015078 | <i>Ifitm3</i>     | Interferon-induced transmembra   |
| ENSRNOG00000011970 | <i>Tmem82</i>     | Putative uncharacterized protein |
| ENSRNOG00000017804 | <i>Sept1</i>      | Septin-1                         |
| ENSRNOG00000035334 | <i>U1</i>         | U1 spliceosomal RNA              |
| ENSRNOG00000020837 | <i>D4A4H1_RAT</i> | Uncharacterized protein          |
| ENSRNOG00000033110 | <i>Svep1</i>      | Sushi                            |
| ENSRNOG00000019902 | <i>Folr1</i>      | folate receptor alpha            |
| ENSRNOG00000020702 | <i>Cybas3</i>     | Cytochrome b ascorbate-depende   |
| ENSRNOG00000001861 | <i>YdjC</i>       | YdjC homolog                     |
| ENSRNOG00000015078 | <i>Ifitm3</i>     | Interferon-induced transmembra   |
| ENSRNOG00000020837 | <i>D4A4H1_RAT</i> | Uncharacterized protein          |
| ENSRNOG00000022790 | <i>F1M8C9_RAT</i> | Uncharacterized protein          |
| ENSRNOG00000022790 | <i>F1M8C9_RAT</i> | Uncharacterized protein          |
| ENSRNOG00000022790 | <i>F1M8C9_RAT</i> | Uncharacterized protein          |
| ENSRNOG00000022790 | <i>F1M8C9_RAT</i> | Uncharacterized protein          |
| ENSRNOG00000022790 | <i>F1M8C9_RAT</i> | Uncharacterized protein          |
| ENSRNOG00000022790 | <i>F1M8C9_RAT</i> | Uncharacterized protein          |
| ENSRNOG00000011852 | <i>Myo6</i>       | Uncharacterized protein          |
| ENSRNOG00000011852 | <i>Myo6</i>       | Uncharacterized protein          |
| ENSRNOG00000019271 | <i>Ulk4</i>       | Uncharacterized protein          |



|                    |                   |                                              |
|--------------------|-------------------|----------------------------------------------|
| ENSRNOG00000019271 | <i>Ulk4</i>       | Uncharacterized protein                      |
| ENSRNOG00000019271 | <i>Ulk4</i>       | Uncharacterized protein                      |
| ENSRNOG00000019271 | <i>Ulk4</i>       | Uncharacterized protein                      |
| ENSRNOG00000018185 | <i>Sag</i>        | S-arrestin                                   |
| ENSRNOG00000013521 | <i>Dhfr</i>       | Dihydrofolate reductase                      |
| ENSRNOG00000004200 | <i>Golsyn</i>     | Uncharacterized protein                      |
| ENSRNOG00000017342 | <i>Zdhhc7</i>     | Palmitoyltransferase ZDHHC7                  |
| ENSRNOG00000006783 | <i>F1M1J1_RAT</i> | Nebulin (Predicted)Uncharacteriz             |
| ENSRNOG00000016413 | <i>Pstpip1</i>    | proline-serine-threonine phosphatase         |
| ENSRNOG00000010208 | <i>Timp1</i>      | Metalloproteinase inhibitor 1                |
| ENSRNOG00000010208 | <i>Timp1</i>      | Metalloproteinase inhibitor 1                |
| ENSRNOG00000007713 | <i>Tmcc3</i>      | transmembrane and coiled-coil domain protein |
| ENSRNOG00000028236 | <i>RGD1309104</i> | Uncharacterized protein                      |
| ENSRNOG00000028236 | <i>RGD1309104</i> | Uncharacterized protein                      |
| ENSRNOG00000011028 | <i>D3ZV66_RAT</i> | Uncharacterized protein                      |
| ENSRNOG00000011028 | <i>D3ZV66_RAT</i> | Uncharacterized protein                      |
| ENSRNOG00000011028 | <i>D3ZV66_RAT</i> | Uncharacterized protein                      |
| ENSRNOG00000012110 | <i>Col17a1</i>    | collagen alpha-1(XVII) chain                 |
| ENSRNOG00000012110 | <i>Col17a1</i>    | collagen alpha-1(XVII) chain                 |
| ENSRNOG00000020284 | <i>Prkar2a</i>    | cAMP-dependent protein kinase 1              |
| ENSRNOG00000014526 | <i>D4A5Z3_RAT</i> | Uncharacterized protein                      |
| ENSRNOG00000014526 | <i>D4A5Z3_RAT</i> | Uncharacterized protein                      |
| ENSRNOG00000018321 | <i>Syt13</i>      | synaptotagmin-like protein 3                 |
| ENSRNOG00000025994 | <i>Krt80</i>      | Keratin                                      |
| ENSRNOG00000025994 | <i>Krt80</i>      | Keratin                                      |
| ENSRNOG00000025994 | <i>Krt80</i>      | Keratin                                      |
| ENSRNOG00000025994 | <i>Krt80</i>      | Keratin                                      |
| ENSRNOG00000001795 | <i>D4AC54_RAT</i> | integrin                                     |
| ENSRNOG00000001795 | <i>D4AC54_RAT</i> | integrin                                     |
| ENSRNOG00000001795 | <i>D4AC54_RAT</i> | integrin                                     |
| ENSRNOG00000006646 | <i>Ecop</i>       | EGFR-coamplified and overexpressed protein   |
| ENSRNOG00000006646 | <i>Ecop</i>       | EGFR-coamplified and overexpressed protein   |
| ENSRNOG00000014747 | <i>F1LX73_RAT</i> | Uncharacterized protein                      |
| ENSRNOG00000014747 | <i>F1LX73_RAT</i> | Uncharacterized protein                      |
| ENSRNOG00000001817 | <i>Tm7sf3</i>     | Transmembrane 7 superfamily member           |
| ENSRNOG00000034303 | <i>Spon1</i>      | Spondin-1                                    |
| ENSRNOG00000034303 | <i>Spon1</i>      | Spondin-1                                    |
| ENSRNOG00000011847 | <i>Grk4</i>       | G protein-coupled receptor kinase            |

|                    |                   |                                     |
|--------------------|-------------------|-------------------------------------|
| ENSRNOG00000011847 | <i>Grk4</i>       | G protein-coupled receptor kinase   |
| ENSRNOG00000016516 | <i>MBP_RAT</i>    | Myelin basic protein S              |
| ENSRNOG00000016516 | <i>MBP_RAT</i>    | Myelin basic protein S              |
| ENSRNOG00000010753 | <i>Aig1</i>       | androgen-induced gene 1 protein     |
| ENSRNOG00000010753 | <i>Aig1</i>       | androgen-induced gene 1 protein     |
| ENSRNOG00000010753 | <i>Aig1</i>       | androgen-induced gene 1 protein     |
| ENSRNOG00000015367 | <i>D3ZYR3_RAT</i> | Uncharacterized protein             |
| ENSRNOG00000015367 | <i>D3ZYR3_RAT</i> | Uncharacterized protein             |
| ENSRNOG00000015367 | <i>D3ZYR3_RAT</i> | Uncharacterized protein             |
| ENSRNOG00000003054 | <i>Cask</i>       | Peripheral plasma membrane protein  |
| ENSRNOG00000003054 | <i>Cask</i>       | Peripheral plasma membrane protein  |
| ENSRNOG00000003054 | <i>Cask</i>       | Peripheral plasma membrane protein  |
| ENSRNOG00000003054 | <i>Cask</i>       | Peripheral plasma membrane protein  |
| ENSRNOG00000003054 | <i>Cask</i>       | Peripheral plasma membrane protein  |
| ENSRNOG00000003054 | <i>Cask</i>       | Peripheral plasma membrane protein  |
| ENSRNOG00000003054 | <i>Cask</i>       | Peripheral plasma membrane protein  |
| ENSRNOG00000018778 | <i>Cadm1</i>      | cell adhesion molecule 1            |
| ENSRNOG00000010011 | <i>Osbpl3</i>     | Oxysterol-binding protein           |
| ENSRNOG00000010011 | <i>Osbpl3</i>     | Oxysterol-binding protein           |
| ENSRNOG00000010011 | <i>Osbpl3</i>     | Oxysterol-binding protein           |
| ENSRNOG00000019351 | <i>Chid1</i>      | Chitinase domain-containing protein |
| ENSRNOG00000019351 | <i>Chid1</i>      | Chitinase domain-containing protein |
| ENSRNOG00000019351 | <i>Chid1</i>      | Chitinase domain-containing protein |
| ENSRNOG00000033627 | <i>Panx2</i>      | Pannexin-2                          |
| ENSRNOG00000033627 | <i>Panx2</i>      | Pannexin-2                          |
| ENSRNOG00000033627 | <i>Panx2</i>      | Pannexin-2                          |
| ENSRNOG00000033627 | <i>Panx2</i>      | Pannexin-2                          |
| ENSRNOG00000033627 | <i>Panx2</i>      | Pannexin-2                          |
| ENSRNOG00000033627 | <i>Panx2</i>      | Pannexin-2                          |
| ENSRNOG00000033627 | <i>Panx2</i>      | Pannexin-2                          |
| ENSRNOG00000033627 | <i>Panx2</i>      | Pannexin-2                          |
| ENSRNOG00000033627 | <i>Panx2</i>      | Pannexin-2                          |
| ENSRNOG00000014705 | <i>Rbm20</i>      | probable RNA-binding protein 20     |
| ENSRNOG00000014705 | <i>Rbm20</i>      | probable RNA-binding protein 20     |
| ENSRNOG00000014705 | <i>Rbm20</i>      | probable RNA-binding protein 20     |
| ENSRNOG00000011386 | <i>RGD1308124</i> | Uncharacterized protein             |
| ENSRNOG00000011386 | <i>RGD1308124</i> | Uncharacterized protein             |
| ENSRNOG00000007660 | <i>Fntb</i>       | Protein farnesyltransferase subunit |
| ENSRNOG00000021440 | <i>Pptc7</i>      | protein phosphatase PTC7 homolog    |
| ENSRNOG00000032437 | <i>Pard3</i>      | Partitioning defective 3 homolog    |

|                    |                   |                                    |
|--------------------|-------------------|------------------------------------|
| ENSRNOG00000032437 | <i>Pard3</i>      | Partitioning defective 3 homolog   |
| ENSRNOG00000032437 | <i>Pard3</i>      | Partitioning defective 3 homolog   |
| ENSRNOG00000032437 | <i>Pard3</i>      | Partitioning defective 3 homolog   |
| ENSRNOG00000011503 | <i>RGD1565350</i> | Uncharacterized protein            |
| ENSRNOG00000042788 | <i>F1M260_RAT</i> | Uncharacterized protein            |
| ENSRNOG00000042788 | <i>F1M260_RAT</i> | Uncharacterized protein            |
| ENSRNOG00000002408 | <i>Rbm47</i>      | RNA-binding protein 47             |
| ENSRNOG00000042740 | <i>Mrpl42</i>     | 28S ribosomal protein L42          |
| ENSRNOG00000023991 | <i>Rab20</i>      | ras-related protein Rab-20         |
| ENSRNOG00000001706 | <i>Kalrn</i>      | Kalirin                            |
| ENSRNOG00000001706 | <i>Kalrn</i>      | Kalirin                            |
| ENSRNOG00000001706 | <i>Kalrn</i>      | Kalirin                            |
| ENSRNOG00000001706 | <i>Kalrn</i>      | Kalirin                            |
| ENSRNOG00000023589 | <i>Gpr107</i>     | protein GPR107                     |
| ENSRNOG00000007533 | <i>Rab27a</i>     | Ras-related protein Rab-27A        |
| ENSRNOG00000017020 | <i>Inpp5d</i>     | Phosphatidylinositol-3             |
| ENSRNOG00000017020 | <i>Inpp5d</i>     | Phosphatidylinositol-3             |
| ENSRNOG00000026316 | <i>Wdr43</i>      | WD repeat domain 43                |
| ENSRNOG00000013248 | <i>Wwc2</i>       | protein WWC2                       |
| ENSRNOG00000013248 | <i>Wwc2</i>       | protein WWC2                       |
| ENSRNOG00000013248 | <i>Wwc2</i>       | protein WWC2                       |
| ENSRNOG00000015084 | <i>Necab2</i>     | N-terminal EF-hand calcium-binding |
| ENSRNOG00000032941 | <i>Mab21l1</i>    | protein mab-21-like 1              |
| ENSRNOG00000012325 | <i>Adk</i>        | Adenosine kinase                   |
| ENSRNOG00000012325 | <i>Adk</i>        | Adenosine kinase                   |
| ENSRNOG00000008758 | <i>Tspan18</i>    | tetraspanin-18                     |
| ENSRNOG00000010487 | <i>Dnajb14</i>    | dnaJ homolog subfamily B member    |
| ENSRNOG00000001169 | <i>Slc37a1</i>    | glycerol-3-phosphate transporter   |
| ENSRNOG00000027097 | <i>F1M683_RAT</i> | Uncharacterized protein            |
| ENSRNOG00000001104 | <i>Foxk1</i>      | forkhead box K1                    |
| ENSRNOG00000036690 | <i>Dysfip1</i>    | dysferlin-interacting protein 1    |
| ENSRNOG00000024620 | <i>F1M9P7_RAT</i> | Uncharacterized protein            |
| ENSRNOG00000017120 | <i>Abhd2</i>      | abhydrolase domain-containing p    |
| ENSRNOG00000010286 | <i>Cast</i>       | Calpastatin                        |
| ENSRNOG00000010286 | <i>Cast</i>       | Calpastatin                        |
| ENSRNOG00000010286 | <i>Cast</i>       | Calpastatin                        |
| ENSRNOG00000010286 | <i>Cast</i>       | Calpastatin                        |
| ENSRNOG00000000916 | <i>Katnal1</i>    | Katanin p60 ATPase-containing su   |

|                    |                   |                                    |
|--------------------|-------------------|------------------------------------|
| ENSRNOG00000031168 | <i>Arhgap15</i>   | Rho GTPase-activating protein 15   |
| ENSRNOG00000015054 | <i>Rcbtb2</i>     | RCC1 and BTB domain-containing     |
| ENSRNOG00000020656 | <i>Pfkfb4</i>     | 6-phosphofructo-2-kinase/fructos   |
| ENSRNOG00000020656 | <i>Pfkfb4</i>     | 6-phosphofructo-2-kinase/fructos   |
| ENSRNOG00000020656 | <i>Pfkfb4</i>     | 6-phosphofructo-2-kinase/fructos   |
| ENSRNOG00000008015 | <i>Fos</i>        | Proto-oncogene c-Fos               |
| ENSRNOG00000008015 | <i>Fos</i>        | Proto-oncogene c-Fos               |
| ENSRNOG00000014903 | <i>Zfyve27</i>    | zinc finger FYVE domain-containir  |
| ENSRNOG00000014903 | <i>Zfyve27</i>    | zinc finger FYVE domain-containir  |
| ENSRNOG00000024136 | <i>Fam151b</i>    | family with sequence similarity 15 |
| ENSRNOG00000006079 | <i>Psd4</i>       | PH and SEC7 domain-containing p    |
| ENSRNOG00000006384 | <i>Ddx58</i>      | DEAD (Asp-Glu-Ala-Asp) box poly    |
| ENSRNOG00000006384 | <i>Ddx58</i>      | DEAD (Asp-Glu-Ala-Asp) box poly    |
| ENSRNOG00000006384 | <i>Ddx58</i>      | DEAD (Asp-Glu-Ala-Asp) box poly    |
| ENSRNOG00000006384 | <i>Ddx58</i>      | DEAD (Asp-Glu-Ala-Asp) box poly    |
| ENSRNOG00000018760 | <i>Mpp7</i>       | MAGUK p55 subfamily member 7       |
| ENSRNOG00000018760 | <i>Mpp7</i>       | MAGUK p55 subfamily member 7       |
| ENSRNOG00000010512 | <i>Yipf1</i>      | Protein YIPF1                      |
| ENSRNOG00000010512 | <i>Yipf1</i>      | Protein YIPF1                      |
| ENSRNOG00000010512 | <i>Yipf1</i>      | Protein YIPF1                      |
| ENSRNOG00000006231 | <i>Ptpro</i>      | receptor-type tyrosine-protein pr  |
| ENSRNOG00000006231 | <i>Ptpro</i>      | receptor-type tyrosine-protein pr  |
| ENSRNOG00000019213 | <i>Gpd1</i>       | Glycerol-3-phosphate dehydroge     |
| ENSRNOG00000019213 | <i>Gpd1</i>       | Glycerol-3-phosphate dehydroge     |
| ENSRNOG00000028460 | <i>Lrrc8e</i>     | Leucine-rich repeat-containing pr  |
| ENSRNOG00000001138 | <i>Taok3</i>      | Serine/threonine-protein kinase 1  |
| ENSRNOG00000013340 | <i>Twsg1</i>      | twisted gastrulation homolog 1     |
| ENSRNOG00000026061 | <i>RGD1566226</i> | Putative uncharacterized protein   |
| ENSRNOG00000013252 | <i>Sdccag10</i>   | Peptidyl-prolyl cis-trans isomer   |
| ENSRNOG00000019228 | <i>Pik3r2</i>     | Phosphatidylinositol 3-kinase reg  |
| ENSRNOG00000019228 | <i>Pik3r2</i>     | Phosphatidylinositol 3-kinase reg  |
| ENSRNOG00000019228 | <i>Pik3r2</i>     | Phosphatidylinositol 3-kinase reg  |
| ENSRNOG00000000991 | <i>Arpc1b</i>     | Actin-related protein 2/3 comple   |
| ENSRNOG00000001227 | <i>Adarb1</i>     | Double-stranded RNA-specific edi   |
| ENSRNOG00000007574 | <i>Padi2</i>      | Protein-arginine deiminase type-2  |
| ENSRNOG00000004709 | <i>Foxn3</i>      | forkhead box protein N3            |
| ENSRNOG00000013333 | <i>D3ZDF2_RAT</i> | Uncharacterized protein            |
| ENSRNOG00000013333 | <i>D3ZDF2_RAT</i> | Uncharacterized protein            |

|                    |                   |                                   |
|--------------------|-------------------|-----------------------------------|
| ENSRNOG00000013322 | <i>DPOLA_RAT</i>  | DNA polymerase alpha catalytic s  |
| ENSRNOG00000008474 | <i>Acox3</i>      | Peroxisomal acyl-coenzyme A oxi   |
| ENSRNOG00000008474 | <i>Acox3</i>      | Peroxisomal acyl-coenzyme A oxi   |
| ENSRNOG00000008474 | <i>Acox3</i>      | Peroxisomal acyl-coenzyme A oxi   |
| ENSRNOG00000001309 | <i>Camkk2</i>     | Calcium/calmodulin-dependent p    |
| ENSRNOG00000001309 | <i>Camkk2</i>     | Calcium/calmodulin-dependent p    |
| ENSRNOG00000001309 | <i>Camkk2</i>     | Calcium/calmodulin-dependent p    |
| ENSRNOG00000001309 | <i>Camkk2</i>     | Calcium/calmodulin-dependent p    |
| ENSRNOG00000001309 | <i>Camkk2</i>     | Calcium/calmodulin-dependent p    |
| ENSRNOG00000019346 | <i>Tmco3</i>      | transmembrane and coiled-coil d   |
| ENSRNOG00000008815 | <i>Fbxo46</i>     | F-box only protein 46             |
| ENSRNOG00000025818 | <i>D3ZYPO_RAT</i> | Uncharacterized protein           |
| ENSRNOG00000019948 | <i>Phf20</i>      | PHD finger protein 20             |
| ENSRNOG00000019948 | <i>Phf20</i>      | PHD finger protein 20             |
| ENSRNOG00000032768 | <i>D3Z9G8_RAT</i> | syntaxin-binding protein 4        |
| ENSRNOG00000002898 | <i>Nme7</i>       | Nucleoside diphosphate kinase 7   |
| ENSRNOG00000043167 | <i>Itga9</i>      | Uncharacterized protein           |
| ENSRNOG00000005930 | <i>Nnmt</i>       | nicotinamide N-methyltransferase  |
| ENSRNOG00000012818 | <i>Ksr1</i>       | kinase suppressor of Ras 1        |
| ENSRNOG00000012818 | <i>Ksr1</i>       | kinase suppressor of Ras 1        |
| ENSRNOG00000012818 | <i>Ksr1</i>       | kinase suppressor of Ras 1        |
| ENSRNOG00000017132 | <i>D4A060_RAT</i> | sorting nexin-30                  |
| ENSRNOG00000017132 | <i>D4A060_RAT</i> | sorting nexin-30                  |
| ENSRNOG00000017132 | <i>D4A060_RAT</i> | sorting nexin-30                  |
| ENSRNOG00000017132 | <i>D4A060_RAT</i> | sorting nexin-30                  |
| ENSRNOG00000018342 | <i>D3ZD47_RAT</i> | Uncharacterized protein           |
| ENSRNOG00000010365 | <i>Syn1</i>       | Synapsin-1                        |
| ENSRNOG00000010365 | <i>Syn1</i>       | Synapsin-1                        |
| ENSRNOG00000013780 | <i>NF1_RAT</i>    | Neurofibromin                     |
| ENSRNOG00000013780 | <i>NF1_RAT</i>    | Neurofibromin                     |
| ENSRNOG00000013780 | <i>NF1_RAT</i>    | Neurofibromin                     |
| ENSRNOG00000013780 | <i>NF1_RAT</i>    | Neurofibromin                     |
| ENSRNOG00000024414 | <i>Ate1</i>       | arginyl-tRNA--protein transferase |
| ENSRNOG00000024414 | <i>Ate1</i>       | arginyl-tRNA--protein transferase |
| ENSRNOG00000024414 | <i>Ate1</i>       | arginyl-tRNA--protein transferase |
| ENSRNOG00000024414 | <i>Ate1</i>       | arginyl-tRNA--protein transferase |
| ENSRNOG00000036814 | <i>D4ACY5_RAT</i> | Uncharacterized protein           |
| ENSRNOG00000036814 | <i>D4ACY5_RAT</i> | Uncharacterized protein           |

|                    |                   |                                    |
|--------------------|-------------------|------------------------------------|
| ENSRNOG00000036814 | <i>D4ACY5_RAT</i> | Uncharacterized protein            |
| ENSRNOG00000036814 | <i>D4ACY5_RAT</i> | Uncharacterized protein            |
| ENSRNOG00000011254 | <i>Fam76a</i>     | family with sequence similarity 76 |
| ENSRNOG00000011254 | <i>Fam76a</i>     | family with sequence similarity 76 |
| ENSRNOG00000011254 | <i>Fam76a</i>     | family with sequence similarity 76 |
| ENSRNOG00000042519 | <i>RGD1312026</i> | similar to RIKEN cDNA C230081A:    |
| ENSRNOG00000003931 | <i>Arsq</i>       | Arylsulfatase G                    |
| ENSRNOG00000010065 | <i>D4ADL8_RAT</i> | Uncharacterized protein            |
| ENSRNOG00000010065 | <i>D4ADL8_RAT</i> | Uncharacterized protein            |
| ENSRNOG00000014000 | <i>Kif2a</i>      | Kinesin-like protein KIF2A         |
| ENSRNOG00000014000 | <i>Kif2a</i>      | Kinesin-like protein KIF2A         |
| ENSRNOG00000020706 | <i>Kcnn3</i>      | Small conductance calcium-activa   |
| ENSRNOG00000024632 | <i>Atf6</i>       | cyclic AMP-dependent transcripti   |
| ENSRNOG00000020193 | <i>Runx2</i>      | Runt-related transcription factor  |
| ENSRNOG00000020193 | <i>Runx2</i>      | Runt-related transcription factor  |
| ENSRNOG00000015145 | <i>Ppp6c</i>      | Serine/threonine-protein phosph    |
| ENSRNOG00000018425 | <i>Dym</i>        | Dymeclin                           |
| ENSRNOG00000018425 | <i>Dym</i>        | Dymeclin                           |
| ENSRNOG00000018400 | <i>D4AEL2_RAT</i> | Uncharacterized protein            |
| ENSRNOG00000014806 | <i>F1M1E4_RAT</i> | myofibrillogenesis regulator 1 iso |
| ENSRNOG00000014806 | <i>F1M1E4_RAT</i> | myofibrillogenesis regulator 1 iso |
| ENSRNOG00000014806 | <i>F1M1E4_RAT</i> | myofibrillogenesis regulator 1 iso |
| ENSRNOG00000025216 | <i>Alkbh6</i>     | probable alpha-ketoglutarate-dep   |
| ENSRNOG00000025216 | <i>Alkbh6</i>     | probable alpha-ketoglutarate-dep   |
| ENSRNOG00000033593 | <i>Osbpl9</i>     | oxysterol binding protein-like 9   |
| ENSRNOG00000033593 | <i>Osbpl9</i>     | oxysterol binding protein-like 9   |
| ENSRNOG00000033593 | <i>Osbpl9</i>     | oxysterol binding protein-like 9   |
| ENSRNOG00000024533 | <i>Aer61</i>      | Uncharacterized glycosyltransfer   |
| ENSRNOG00000015677 | <i>Cda</i>        | cytidine deaminase                 |
| ENSRNOG00000002122 | <i>Lrrc8c</i>     | Leucine-rich repeat-containing pr  |
| ENSRNOG00000005183 | <i>Rtf1</i>       | RNA polymerase-associated prote    |
| ENSRNOG00000005183 | <i>Rtf1</i>       | RNA polymerase-associated prote    |
| ENSRNOG00000005183 | <i>Rtf1</i>       | RNA polymerase-associated prote    |
| ENSRNOG00000013946 | <i>D3ZI66_RAT</i> | Uncharacterized protein            |
| ENSRNOG00000038079 | <i>Uba2</i>       | ubiquitin-like modifier activating |
| ENSRNOG00000038079 | <i>Uba2</i>       | ubiquitin-like modifier activating |
| ENSRNOG00000017463 | <i>Bloc1s3</i>    | Uncharacterized protein            |
| ENSRNOG00000023760 | <i>Plekhm3</i>    | Uncharacterized protein            |

|                    |                   |                                   |
|--------------------|-------------------|-----------------------------------|
| ENSRNOG00000023760 | <i>Plekhm3</i>    | Uncharacterized protein           |
| ENSRNOG00000011752 | <i>Sh3d19</i>     | Similar to SH3 domain protein D1  |
| ENSRNOG00000000695 | <i>F1LWM1_RAT</i> | Uncharacterized protein           |
| ENSRNOG00000000695 | <i>F1LWM1_RAT</i> | Uncharacterized protein           |
| ENSRNOG00000032055 | <i>Spats2</i>     | spermatogenesis-associated serin  |
| ENSRNOG00000032055 | <i>Spats2</i>     | spermatogenesis-associated serin  |
| ENSRNOG00000027002 | <i>D4A8R8_RAT</i> | Uncharacterized protein           |
| ENSRNOG00000016897 | <i>Rlbp1</i>      | retinaldehyde-binding protein 1   |
| ENSRNOG00000015932 | <i>RGD1306839</i> | similar to RIKEN cDNA 5033414D(   |
| ENSRNOG00000034298 | <i>F1LXEO_RAT</i> | Uncharacterized protein           |
| ENSRNOG00000034298 | <i>F1LXEO_RAT</i> | Uncharacterized protein           |
| ENSRNOG00000034298 | <i>F1LXEO_RAT</i> | Uncharacterized protein           |
| ENSRNOG00000034298 | <i>F1LXEO_RAT</i> | Uncharacterized protein           |
| ENSRNOG00000007246 | <i>Atnx7</i>      | Uncharacterized protein           |
| ENSRNOG00000030216 | <i>Abcg3l1</i>    | ATP-binding cassette              |
| ENSRNOG00000030216 | <i>Abcg3l1</i>    | ATP-binding cassette              |
| ENSRNOG00000011321 | <i>Rftn1</i>      | raft-linking protein              |
| ENSRNOG00000026059 | <i>Paqr6</i>      | progestin and adipoQ receptor fa  |
| ENSRNOG00000026059 | <i>Paqr6</i>      | progestin and adipoQ receptor fa  |
| ENSRNOG00000026059 | <i>Paqr6</i>      | progestin and adipoQ receptor fa  |
| ENSRNOG00000003821 | <i>D3ZDU2_RAT</i> | raptor                            |
| ENSRNOG00000012405 | <i>Tcf4</i>       | Transcription factor 4            |
| ENSRNOG00000012405 | <i>Tcf4</i>       | Transcription factor 4            |
| ENSRNOG00000014616 | <i>Iars</i>       | isoleucyl-tRNA synthetase         |
| ENSRNOG00000014616 | <i>Iars</i>       | isoleucyl-tRNA synthetase         |
| ENSRNOG00000005984 | <i>Etv6</i>       | transcription factor ETV6         |
| ENSRNOG00000005984 | <i>Etv6</i>       | transcription factor ETV6         |
| ENSRNOG00000019299 | <i>Edem2</i>      | ER degradation-enhancing alpha-   |
| ENSRNOG00000018649 | <i>Slc35c2</i>    | solute carrier family 35 member ( |
| ENSRNOG00000018649 | <i>Slc35c2</i>    | solute carrier family 35 member ( |
| ENSRNOG00000018649 | <i>Slc35c2</i>    | solute carrier family 35 member ( |
| ENSRNOG00000018649 | <i>Slc35c2</i>    | solute carrier family 35 member ( |
| ENSRNOG00000018649 | <i>Slc35c2</i>    | solute carrier family 35 member ( |
| ENSRNOG00000018649 | <i>Slc35c2</i>    | solute carrier family 35 member ( |
| ENSRNOG00000018649 | <i>Slc35c2</i>    | solute carrier family 35 member ( |
| ENSRNOG00000022929 | <i>MTMRC_RAT</i>  | Myotubularin-related protein 12   |
| ENSRNOG00000022929 | <i>MTMRC_RAT</i>  | Myotubularin-related protein 12   |
| ENSRNOG00000005234 | <i>Glt8d3</i>     | Glucoside xylosyltransferase 1    |
| ENSRNOG00000005234 | <i>Glt8d3</i>     | Glucoside xylosyltransferase 1    |

|                    |                     |                                   |
|--------------------|---------------------|-----------------------------------|
| ENSRNOG00000005234 | <i>Glt8d3</i>       | Glucoside xylosyltransferase 1    |
| ENSRNOG00000002040 | <i>Bmp2k</i>        | Uncharacterized protein           |
| ENSRNOG00000002040 | <i>Bmp2k</i>        | Uncharacterized protein           |
| ENSRNOG00000005483 | <i>Rpap1</i>        | RNA polymerase II-associated pro  |
| ENSRNOG00000011435 | <i>Osbpl10</i>      | Oxysterol-binding protein         |
| ENSRNOG00000011435 | <i>Osbpl10</i>      | Oxysterol-binding protein         |
| ENSRNOG00000024352 | <i>Tyw1</i>         | tRNA wybutosine-synthesizing pr   |
| ENSRNOG00000033234 | <i>Ccrl2</i>        | C-C chemokine receptor-like 2     |
| ENSRNOG00000000567 | <i>Unc5b</i>        | Netrin receptor UNC5B             |
| ENSRNOG00000000567 | <i>Unc5b</i>        | Netrin receptor UNC5B             |
| ENSRNOG00000000567 | <i>Unc5b</i>        | Netrin receptor UNC5B             |
| ENSRNOG00000000567 | <i>Unc5b</i>        | Netrin receptor UNC5B             |
| ENSRNOG00000009980 | <i>Ppap2a</i>       | Lipid phosphate phosphohydrolas   |
| ENSRNOG00000009980 | <i>Ppap2a</i>       | Lipid phosphate phosphohydrolas   |
| ENSRNOG00000009980 | <i>Ppap2a</i>       | Lipid phosphate phosphohydrolas   |
| ENSRNOG00000001289 | <i>LOC498154</i>    | Uncharacterized protein C7orf50   |
| ENSRNOG00000001289 | <i>LOC498154</i>    | Uncharacterized protein C7orf50   |
| ENSRNOG00000001289 | <i>LOC498154</i>    | Uncharacterized protein C7orf50   |
| ENSRNOG00000001289 | <i>LOC498154</i>    | Uncharacterized protein C7orf50   |
| ENSRNOG00000001304 | <i>Bcr</i>          | Uncharacterized protein           |
| ENSRNOG00000001304 | <i>Bcr</i>          | Uncharacterized protein           |
| ENSRNOG00000001242 | <i>Gstt3</i>        | Glutathione S-transferase theta-1 |
| ENSRNOG00000001242 | <i>Gstt3</i>        | Glutathione S-transferase theta-1 |
| ENSRNOG00000012561 | <i>F1M0Z4_RAT</i>   | Uncharacterized protein           |
| ENSRNOG00000012363 | <i>Peli2</i>        | protein pellino homolog 2         |
| ENSRNOG00000012363 | <i>Peli2</i>        | protein pellino homolog 2         |
| ENSRNOG00000013875 | <i>Fbxl17</i>       | F-box/LRR-repeat protein 17       |
| ENSRNOG00000016696 | <i>Angpt2</i>       | Angiopoietin-2                    |
| ENSRNOG00000016696 | <i>Angpt2</i>       | Angiopoietin-2                    |
| ENSRNOG00000034025 | <i>D4A4T5_RAT</i>   | Uncharacterized protein           |
| ENSRNOG00000034025 | <i>D4A4T5_RAT</i>   | Uncharacterized protein           |
| ENSRNOG00000034025 | <i>D4A4T5_RAT</i>   | Uncharacterized protein           |
| ENSRNOG00000034025 | <i>D4A4T5_RAT</i>   | Uncharacterized protein           |
| ENSRNOG00000034025 | <i>D4A4T5_RAT</i>   | Uncharacterized protein           |
| ENSRNOG00000034025 | <i>D4A4T5_RAT</i>   | Uncharacterized protein           |
| ENSRNOG00000034025 | <i>D4A4T5_RAT</i>   | Uncharacterized protein           |
| ENSRNOG00000034025 | <i>D4A4T5_RAT</i>   | Uncharacterized protein           |
| ENSRNOG00000042096 | <i>LOC100366081</i> | RCG54037Uncharacterized protei    |



|                    |                   |                                       |
|--------------------|-------------------|---------------------------------------|
| ENSRNOG00000013323 | <i>Rnf217</i>     | probable E3 ubiquitin-protein liga    |
| ENSRNOG00000010227 | <i>RGD1308907</i> | similar to FLJ20689 (RGD1308907       |
| ENSRNOG00000010227 | <i>RGD1308907</i> | similar to FLJ20689 (RGD1308907       |
| ENSRNOG00000028426 | <i>Mcf2l</i>      | Guanine nucleotide exchange fac       |
| ENSRNOG00000028426 | <i>Mcf2l</i>      | Guanine nucleotide exchange fac       |
| ENSRNOG00000028426 | <i>Mcf2l</i>      | Guanine nucleotide exchange fac       |
| ENSRNOG00000028426 | <i>Mcf2l</i>      | Guanine nucleotide exchange fac       |
| ENSRNOG00000013135 | <i>Ptpn12</i>     | tyrosine-protein phosphatase nor      |
| ENSRNOG00000013135 | <i>Ptpn12</i>     | tyrosine-protein phosphatase nor      |
| ENSRNOG00000016306 | <i>Gpr98</i>      | Uncharacterized protein               |
| ENSRNOG00000016306 | <i>Gpr98</i>      | Uncharacterized protein               |
| ENSRNOG00000009708 | <i>Tas1r1</i>     | Taste receptor type 1 member 1        |
| ENSRNOG00000008904 | <i>Fli1</i>       | Friend leukemia integration 1 tra     |
| ENSRNOG00000008904 | <i>Fli1</i>       | Friend leukemia integration 1 tra     |
| ENSRNOG00000013436 | <i>Pde7b</i>      | cAMP-specific 3'                      |
| ENSRNOG00000013436 | <i>Pde7b</i>      | cAMP-specific 3'                      |
| ENSRNOG00000013962 | <i>Magi2</i>      | Membrane-associated guanylate         |
| ENSRNOG00000013962 | <i>Magi2</i>      | Membrane-associated guanylate         |
| ENSRNOG00000013962 | <i>Magi2</i>      | Membrane-associated guanylate         |
| ENSRNOG00000013962 | <i>Magi2</i>      | Membrane-associated guanylate         |
| ENSRNOG00000007310 | <i>Klr1a</i>      | Killer cell lectin-like receptor subf |
| ENSRNOG00000010155 | <i>Pcm1</i>       | pericentriolar material 1             |
| ENSRNOG00000010155 | <i>Pcm1</i>       | pericentriolar material 1             |
| ENSRNOG00000002749 | <i>E9PU51_RAT</i> | C-Jun-amino-terminal kinase-inte      |
| ENSRNOG00000002749 | <i>E9PU51_RAT</i> | C-Jun-amino-terminal kinase-inte      |
| ENSRNOG00000002749 | <i>E9PU51_RAT</i> | C-Jun-amino-terminal kinase-inte      |
| ENSRNOG00000002749 | <i>E9PU51_RAT</i> | C-Jun-amino-terminal kinase-inte      |
| ENSRNOG00000002749 | <i>E9PU51_RAT</i> | C-Jun-amino-terminal kinase-inte      |
| ENSRNOG00000002749 | <i>E9PU51_RAT</i> | C-Jun-amino-terminal kinase-inte      |
| ENSRNOG00000002749 | <i>E9PU51_RAT</i> | C-Jun-amino-terminal kinase-inte      |
| ENSRNOG00000019140 | <i>Banp</i>       | protein BANP                          |
| ENSRNOG00000019140 | <i>Banp</i>       | protein BANP                          |
| ENSRNOG00000019140 | <i>Banp</i>       | protein BANP                          |
| ENSRNOG00000001288 | <i>Gpr146</i>     | probable G-protein coupled recep      |
| ENSRNOG00000012016 | <i>Cdig2</i>      | Niemann-Pick disease                  |
| ENSRNOG00000009726 | <i>Grip2</i>      | Glutamate receptor-interacting p      |
| ENSRNOG00000009726 | <i>Grip2</i>      | Glutamate receptor-interacting p      |
| ENSRNOG00000009726 | <i>Grip2</i>      | Glutamate receptor-interacting p      |

|                    |                   |                                    |
|--------------------|-------------------|------------------------------------|
| ENSRNOG00000016544 | <i>Rgnef</i>      | Rho-guanine nucleotide exchange    |
| ENSRNOG00000016544 | <i>Rgnef</i>      | Rho-guanine nucleotide exchange    |
| ENSRNOG00000000661 | <i>Hps4</i>       | Hermansky-Pudlak syndrome 4 ho     |
| ENSRNOG00000010813 | <i>Tspan14</i>    | tetraspanin-14                     |
| ENSRNOG00000033425 | <i>F1M2T8_RAT</i> | Uncharacterized protein            |
| ENSRNOG00000021380 | <i>Fads6</i>      | fatty acid desaturase 6            |
| ENSRNOG00000021380 | <i>Fads6</i>      | fatty acid desaturase 6            |
| ENSRNOG00000015455 | <i>Spr</i>        | Sepiapterin reductase              |
| ENSRNOG00000001123 | <i>RGD1562310</i> | Putative uncharacterized protein   |
| ENSRNOG00000010630 | <i>Prcp</i>       | lysosomal Pro-X carboxypeptidase   |
| ENSRNOG00000002146 | <i>Pkd2</i>       | polycystin-2                       |
| ENSRNOG00000002146 | <i>Pkd2</i>       | polycystin-2                       |
| ENSRNOG00000002146 | <i>Pkd2</i>       | polycystin-2                       |
| ENSRNOG00000002146 | <i>Pkd2</i>       | polycystin-2                       |
| ENSRNOG00000015821 | <i>Cd2</i>        | T-cell surface antigen CD2         |
| ENSRNOG00000015821 | <i>Cd2</i>        | T-cell surface antigen CD2         |
| ENSRNOG00000002256 | <i>Art3</i>       | ecto-ADP-ribosyltransferase 3      |
| ENSRNOG00000020799 | <i>Polr2i</i>     | DNA-directed RNA polymerase II :   |
| ENSRNOG00000022312 | <i>Lrsam1</i>     | E3 ubiquitin-protein ligase LRSAM  |
| ENSRNOG00000022312 | <i>Lrsam1</i>     | E3 ubiquitin-protein ligase LRSAM  |
| ENSRNOG00000022312 | <i>Lrsam1</i>     | E3 ubiquitin-protein ligase LRSAM  |
| ENSRNOG00000022312 | <i>Lrsam1</i>     | E3 ubiquitin-protein ligase LRSAM  |
| ENSRNOG00000003138 | <i>Fcgr2a</i>     | Low affinity immunoglobulin gam    |
| ENSRNOG00000017940 | <i>Rere</i>       | Arginine-glutamic acid dipeptide 1 |
| ENSRNOG00000017940 | <i>Rere</i>       | Arginine-glutamic acid dipeptide 1 |
| ENSRNOG00000017940 | <i>Rere</i>       | Arginine-glutamic acid dipeptide 1 |
| ENSRNOG00000011614 | <i>Tmcc1</i>      | Uncharacterized protein            |
| ENSRNOG00000009276 | <i>Schip1</i>     | schwannomin interacting protein    |
| ENSRNOG00000009276 | <i>Schip1</i>     | schwannomin interacting protein    |
| ENSRNOG00000008658 | <i>Mitf</i>       | Microphthalmia-associated trans    |
| ENSRNOG00000008658 | <i>Mitf</i>       | Microphthalmia-associated trans    |
| ENSRNOG00000008658 | <i>Mitf</i>       | Microphthalmia-associated trans    |
| ENSRNOG00000008658 | <i>Mitf</i>       | Microphthalmia-associated trans    |
| ENSRNOG00000008658 | <i>Mitf</i>       | Microphthalmia-associated trans    |
| ENSRNOG00000000599 | <i>F1LTF8_RAT</i> | Uncharacterized protein            |
| ENSRNOG00000016610 | <i>Arhgap1</i>    | Rho GTPase activating protein 1    |
| ENSRNOG00000016610 | <i>Arhgap1</i>    | Rho GTPase activating protein 1    |
| ENSRNOG00000007474 | <i>ST7</i>        | Suppressor of tumorigenicity 7 pr  |



|                    |                   |                                                            |
|--------------------|-------------------|------------------------------------------------------------|
| ENSRNOG00000011969 | <i>Dock9</i>      | Dedicator of cytokinesis protein 9                         |
| ENSRNOG00000011969 | <i>Dock9</i>      | Dedicator of cytokinesis protein 9                         |
| ENSRNOG00000011969 | <i>Dock9</i>      | Dedicator of cytokinesis protein 9                         |
| ENSRNOG00000013177 | <i>Map3k1</i>     | Mitogen-activated protein kinase                           |
| ENSRNOG00000013177 | <i>Map3k1</i>     | Mitogen-activated protein kinase                           |
| ENSRNOG00000021526 | <i>Slc25a34</i>   | Solute carrier family 25 member 34                         |
| ENSRNOG00000026978 | <i>Oscp1</i>      | Protein OSCP1                                              |
| ENSRNOG00000026978 | <i>Oscp1</i>      | Protein OSCP1                                              |
| ENSRNOG00000010219 | <i>GNDS_RAT</i>   | Ral guanine nucleotide dissociation inhibitor 1            |
| ENSRNOG00000010219 | <i>GNDS_RAT</i>   | Ral guanine nucleotide dissociation inhibitor 1            |
| ENSRNOG00000040148 | <i>F1M4U8_RAT</i> | Uncharacterized protein                                    |
| ENSRNOG00000040148 | <i>F1M4U8_RAT</i> | Uncharacterized protein                                    |
| ENSRNOG00000011700 | <i>Ptprm</i>      | receptor-type tyrosine-protein phosphatase                 |
| ENSRNOG00000011700 | <i>Ptprm</i>      | receptor-type tyrosine-protein phosphatase                 |
| ENSRNOG00000001713 | --                | --                                                         |
| ENSRNOG00000001713 | --                | --                                                         |
| ENSRNOG00000001713 | --                | --                                                         |
| ENSRNOG00000036697 | <i>Mafg</i>       | Transcription factor MafG                                  |
| ENSRNOG00000002559 | <i>Cacna1a</i>    | Voltage-dependent P/Q-type calcium channel subunit alpha1A |
| ENSRNOG00000002559 | <i>Cacna1a</i>    | Voltage-dependent P/Q-type calcium channel subunit alpha1A |
| ENSRNOG00000002559 | <i>Cacna1a</i>    | Voltage-dependent P/Q-type calcium channel subunit alpha1A |
| ENSRNOG00000002559 | <i>Cacna1a</i>    | Voltage-dependent P/Q-type calcium channel subunit alpha1A |
| ENSRNOG00000025479 | <i>F1LVW3_RAT</i> | Uncharacterized protein                                    |
| ENSRNOG00000014522 | <i>Mlycd</i>      | Malonyl-CoA decarboxylase                                  |
| ENSRNOG00000008169 | <i>Slc24a2</i>    | Sodium/potassium/calcium exchanger 2                       |
| ENSRNOG00000008169 | <i>Slc24a2</i>    | Sodium/potassium/calcium exchanger 2                       |
| ENSRNOG00000017628 | <i>Tagln</i>      | Transgelin                                                 |
| ENSRNOG00000012932 | <i>LOC499980</i>  | Coiled-coil domain-containing protein 1                    |
| ENSRNOG00000000940 | <i>Flt1</i>       | Vascular endothelial growth factor receptor 1              |
| ENSRNOG00000001047 | <i>Map2k7</i>     | Dual specificity mitogen-activated protein kinase 7        |
| ENSRNOG00000001047 | <i>Map2k7</i>     | Dual specificity mitogen-activated protein kinase 7        |
| ENSRNOG00000004104 | <i>E9PTG0_RAT</i> | zinc finger protein 167                                    |
| ENSRNOG00000036675 | <i>Btbd16</i>     | BTB/POZ domain-containing protein 16                       |
| ENSRNOG00000036675 | <i>Btbd16</i>     | BTB/POZ domain-containing protein 16                       |
| ENSRNOG00000036675 | <i>Btbd16</i>     | BTB/POZ domain-containing protein 16                       |
| ENSRNOG00000036675 | <i>Btbd16</i>     | BTB/POZ domain-containing protein 16                       |
| ENSRNOG00000018382 | <i>Inpp4b</i>     | Type II inositol-3-phosphatase                             |
| ENSRNOG00000018382 | <i>Inpp4b</i>     | Type II inositol-3-phosphatase                             |

|                    |                   |                                                                  |
|--------------------|-------------------|------------------------------------------------------------------|
| ENSRNOG00000030542 | <i>D4AEE8_RAT</i> | Uncharacterized protein                                          |
| ENSRNOG00000019012 | <i>D2hgdh</i>     | D-2-hydroxyglutarate dehydrogenase                               |
| ENSRNOG00000008314 | <i>Orc3l</i>      | Origin recognition complex subunit 3                             |
| ENSRNOG00000000596 | <i>Fyn</i>        | Tyrosine-protein kinase Fyn                                      |
| ENSRNOG00000000596 | <i>Fyn</i>        | Tyrosine-protein kinase Fyn                                      |
| ENSRNOG00000028394 | <i>Vpreb3</i>     | pre-B lymphocyte protein 3                                       |
| ENSRNOG00000002347 | <i>Rgl1</i>       | regulator of guanine nucleotide dissociation-inhibited protein 1 |
| ENSRNOG00000002347 | <i>Rgl1</i>       | regulator of guanine nucleotide dissociation-inhibited protein 1 |
| ENSRNOG00000023376 | <i>Riok3</i>      | serine/threonine-protein kinase F                                |
| ENSRNOG00000025290 | <i>RGD1560603</i> | Uncharacterized protein                                          |
| ENSRNOG00000043562 | --                | --                                                               |
| ENSRNOG00000017671 | <i>Rasa3</i>      | Ras GTPase-activating protein 3                                  |
| ENSRNOG00000017671 | <i>Rasa3</i>      | Ras GTPase-activating protein 3                                  |
| ENSRNOG00000009085 | <i>Prkag2</i>     | 5'-AMP-activated protein kinase subunit gamma                    |
| ENSRNOG00000009085 | <i>Prkag2</i>     | 5'-AMP-activated protein kinase subunit gamma                    |
| ENSRNOG00000003042 | <i>Mettl13</i>    | methyltransferase-like protein 13                                |
| ENSRNOG00000003042 | <i>Mettl13</i>    | methyltransferase-like protein 13                                |
| ENSRNOG00000003042 | <i>Mettl13</i>    | methyltransferase-like protein 13                                |
| ENSRNOG00000014264 | <i>Phactr1</i>    | Phosphatase and actin regulator 1                                |
| ENSRNOG00000014264 | <i>Phactr1</i>    | Phosphatase and actin regulator 1                                |
| ENSRNOG00000014264 | <i>Phactr1</i>    | Phosphatase and actin regulator 1                                |
| ENSRNOG00000014264 | <i>Phactr1</i>    | Phosphatase and actin regulator 1                                |
| ENSRNOG00000018839 | <i>Ntrk2</i>      | BDNF/NT-3 growth factors receptor tyrosine kinase 2              |
| ENSRNOG00000018839 | <i>Ntrk2</i>      | BDNF/NT-3 growth factors receptor tyrosine kinase 2              |
| ENSRNOG00000018839 | <i>Ntrk2</i>      | BDNF/NT-3 growth factors receptor tyrosine kinase 2              |
| ENSRNOG00000018839 | <i>Ntrk2</i>      | BDNF/NT-3 growth factors receptor tyrosine kinase 2              |
| ENSRNOG00000018839 | <i>Ntrk2</i>      | BDNF/NT-3 growth factors receptor tyrosine kinase 2              |
| ENSRNOG00000018839 | <i>Ntrk2</i>      | BDNF/NT-3 growth factors receptor tyrosine kinase 2              |
| ENSRNOG00000018839 | <i>Ntrk2</i>      | BDNF/NT-3 growth factors receptor tyrosine kinase 2              |
| ENSRNOG00000018839 | <i>Ntrk2</i>      | BDNF/NT-3 growth factors receptor tyrosine kinase 2              |
| ENSRNOG00000017673 | <i>Brsk1</i>      | BR serine/threonine-protein kinase                               |
| ENSRNOG00000009956 | <i>WNK1_RAT</i>   | Serine/threonine-protein kinase WNK1                             |
| ENSRNOG00000009956 | <i>WNK1_RAT</i>   | Serine/threonine-protein kinase WNK1                             |
| ENSRNOG00000009956 | <i>WNK1_RAT</i>   | Serine/threonine-protein kinase WNK1                             |
| ENSRNOG00000024457 | <i>Cyct</i>       | Cytochrome c                                                     |
| ENSRNOG00000024457 | <i>Cyct</i>       | Cytochrome c                                                     |
| ENSRNOG00000024457 | <i>Cyct</i>       | Cytochrome c                                                     |
| ENSRNOG00000024457 | <i>Cyct</i>       | Cytochrome c                                                     |
| ENSRNOG00000024457 | <i>Cyct</i>       | Cytochrome c                                                     |

|                    |                   |                                  |
|--------------------|-------------------|----------------------------------|
| ENSRNOG00000024457 | <i>Cyct</i>       | Cytochrome c                     |
| ENSRNOG00000024457 | <i>Cyct</i>       | Cytochrome c                     |
| ENSRNOG00000024457 | <i>Cyct</i>       | Cytochrome c                     |
| ENSRNOG00000024457 | <i>Cyct</i>       | Cytochrome c                     |
| ENSRNOG00000024457 | <i>Cyct</i>       | Cytochrome c                     |
| ENSRNOG00000024457 | <i>Cyct</i>       | Cytochrome c                     |
| ENSRNOG00000024457 | <i>Cyct</i>       | Cytochrome c                     |
| ENSRNOG00000024457 | <i>Cyct</i>       | Cytochrome c                     |
| ENSRNOG00000024457 | <i>Cyct</i>       | Cytochrome c                     |
| ENSRNOG00000024457 | <i>Cyct</i>       | Cytochrome c                     |
| ENSRNOG00000036798 | <i>Dusp3</i>      | dual specificity phosphatase 3   |
| ENSRNOG00000016511 | <i>Pitrm1</i>     | presequence protease             |
| ENSRNOG00000016511 | <i>Pitrm1</i>     | presequence protease             |
| ENSRNOG00000016511 | <i>Pitrm1</i>     | presequence protease             |
| ENSRNOG00000043203 | <i>K2C75_RAT</i>  | Keratin                          |
| ENSRNOG00000043203 | <i>K2C75_RAT</i>  | Keratin                          |
| ENSRNOG00000013351 | <i>STXB5_RAT</i>  | Syntaxin-binding protein 5       |
| ENSRNOG00000013351 | <i>STXB5_RAT</i>  | Syntaxin-binding protein 5       |
| ENSRNOG00000013351 | <i>STXB5_RAT</i>  | Syntaxin-binding protein 5       |
| ENSRNOG00000013388 | <i>Pgap1</i>      | GPI inositol-deacylase           |
| ENSRNOG00000015898 | <i>Fert2</i>      | Tyrosine-protein kinase Fer      |
| ENSRNOG00000015898 | <i>Fert2</i>      | Tyrosine-protein kinase Fer      |
| ENSRNOG00000015898 | <i>Fert2</i>      | Tyrosine-protein kinase Fer      |
| ENSRNOG00000015898 | <i>Fert2</i>      | Tyrosine-protein kinase Fer      |
| ENSRNOG00000015898 | <i>Fert2</i>      | Tyrosine-protein kinase Fer      |
| ENSRNOG00000015898 | <i>Fert2</i>      | Tyrosine-protein kinase Fer      |
| ENSRNOG00000019623 | <i>D3ZQW0_RAT</i> | Uncharacterized protein          |
| ENSRNOG00000019623 | <i>D3ZQW0_RAT</i> | Uncharacterized protein          |
| ENSRNOG00000019623 | <i>D3ZQW0_RAT</i> | Uncharacterized protein          |
| ENSRNOG00000019623 | <i>D3ZQW0_RAT</i> | Uncharacterized protein          |
| ENSRNOG00000008786 | <i>Ap1b1</i>      | AP-1 complex subunit beta-1      |
| ENSRNOG00000008786 | <i>Ap1b1</i>      | AP-1 complex subunit beta-1      |
| ENSRNOG00000008786 | <i>Ap1b1</i>      | AP-1 complex subunit beta-1      |
| ENSRNOG00000013933 | <i>Med27</i>      | mediator of RNA polymerase II tr |
| ENSRNOG00000018413 | <i>Per3</i>       | Period circadian protein homolog |
| ENSRNOG00000018413 | <i>Per3</i>       | Period circadian protein homolog |
| ENSRNOG00000018413 | <i>Per3</i>       | Period circadian protein homolog |
| ENSRNOG00000018413 | <i>Per3</i>       | Period circadian protein homolog |

|                    |                     |                                    |
|--------------------|---------------------|------------------------------------|
| ENSRNOG00000036585 | <i>F1LN76_RAT</i>   | Uncharacterized protein            |
| ENSRNOG00000014079 | <i>Stat4</i>        | signal transducer and activator of |
| ENSRNOG00000014079 | <i>Stat4</i>        | signal transducer and activator of |
| ENSRNOG00000014241 | <i>Ece1</i>         | Endothelin-converting enzyme 1     |
| ENSRNOG00000014241 | <i>Ece1</i>         | Endothelin-converting enzyme 1     |
| ENSRNOG00000015514 | <i>Bcat1</i>        | Branched-chain-amino-acid amin     |
| ENSRNOG00000015514 | <i>Bcat1</i>        | Branched-chain-amino-acid amin     |
| ENSRNOG00000015514 | <i>Bcat1</i>        | Branched-chain-amino-acid amin     |
| ENSRNOG00000015514 | <i>Bcat1</i>        | Branched-chain-amino-acid amin     |
| ENSRNOG00000007330 | <i>Capzb</i>        | F-actin-capping protein subunit b  |
| ENSRNOG00000007330 | <i>Capzb</i>        | F-actin-capping protein subunit b  |
| ENSRNOG00000007330 | <i>Capzb</i>        | F-actin-capping protein subunit b  |
| ENSRNOG00000008279 | <i>Mrps15</i>       | 28S ribosomal protein S15          |
| ENSRNOG00000014504 | <i>Il1r1</i>        | Interleukin-1 receptor type 1      |
| ENSRNOG00000014504 | <i>Il1r1</i>        | Interleukin-1 receptor type 1      |
| ENSRNOG00000014504 | <i>Il1r1</i>        | Interleukin-1 receptor type 1      |
| ENSRNOG00000001804 | <i>ITPR2_RAT</i>    | Inositol 1                         |
| ENSRNOG00000001804 | <i>ITPR2_RAT</i>    | Inositol 1                         |
| ENSRNOG00000001804 | <i>ITPR2_RAT</i>    | Inositol 1                         |
| ENSRNOG00000001804 | <i>ITPR2_RAT</i>    | Inositol 1                         |
| ENSRNOG00000003901 | <i>Ccdc104</i>      | Coiled-coil domain-containing prc  |
| ENSRNOG00000003901 | <i>Ccdc104</i>      | Coiled-coil domain-containing prc  |
| ENSRNOG00000003901 | <i>Ccdc104</i>      | Coiled-coil domain-containing prc  |
| ENSRNOG00000003901 | <i>Ccdc104</i>      | Coiled-coil domain-containing prc  |
| ENSRNOG00000003901 | <i>Ccdc104</i>      | Coiled-coil domain-containing prc  |
| ENSRNOG00000003901 | <i>Ccdc104</i>      | Coiled-coil domain-containing prc  |
| ENSRNOG00000003901 | <i>Ccdc104</i>      | Coiled-coil domain-containing prc  |
| ENSRNOG00000000373 | <i>LOC100362857</i> | Uncharacterized protein            |
| ENSRNOG00000001141 | <i>Srrm4</i>        | Uncharacterized protein            |
| ENSRNOG00000001174 | <i>Pde9a</i>        | high affinity cGMP-specific 3'     |
| ENSRNOG00000001174 | <i>Pde9a</i>        | high affinity cGMP-specific 3'     |
| ENSRNOG00000001298 | <i>F1LQV2_RAT</i>   | Uncharacterized protein            |
| ENSRNOG00000001618 | <i>Ripk4</i>        | receptor-interacting serine/threo  |
| ENSRNOG00000001658 | <i>IRK6_RAT</i>     | G protein-activated inward rectifi |
| ENSRNOG00000001658 | <i>IRK6_RAT</i>     | G protein-activated inward rectifi |
| ENSRNOG00000003741 | <i>Nptx1</i>        | Neuronal pentraxin-1               |
| ENSRNOG00000004516 | <i>Itgbl1</i>       | Integrin beta-like protein 1       |
| ENSRNOG00000004516 | <i>Itgbl1</i>       | Integrin beta-like protein 1       |
| ENSRNOG00000004928 | <i>Sntg2</i>        | gamma-2-syntrophin                 |

|                    |                     |                                   |
|--------------------|---------------------|-----------------------------------|
| ENSRNOG00000004928 | <i>Sntg2</i>        | gamma-2-syntrophin                |
| ENSRNOG00000004966 | <i>Slc38a11</i>     | Uncharacterized protein           |
| ENSRNOG00000004966 | <i>Slc38a11</i>     | Uncharacterized protein           |
| ENSRNOG00000004966 | <i>Slc38a11</i>     | Uncharacterized protein           |
| ENSRNOG00000004966 | <i>Slc38a11</i>     | Uncharacterized protein           |
| ENSRNOG00000004966 | <i>Slc38a11</i>     | Uncharacterized protein           |
| ENSRNOG00000004994 | <i>Agr3</i>         | anterior gradient protein 3 homo  |
| ENSRNOG00000004994 | <i>Agr3</i>         | anterior gradient protein 3 homo  |
| ENSRNOG00000004994 | <i>Agr3</i>         | anterior gradient protein 3 homo  |
| ENSRNOG00000005451 | <i>E9PU24_RAT</i>   | Uncharacterized protein           |
| ENSRNOG00000006226 | <i>Cacng2</i>       | voltage-dependent calcium chanr   |
| ENSRNOG00000006890 | <i>LOC100365021</i> | Uncharacterized protein           |
| ENSRNOG00000006890 | <i>LOC100365021</i> | Uncharacterized protein           |
| ENSRNOG00000006891 | <i>Avpr1b</i>       | Vasopressin V1b receptor          |
| ENSRNOG00000006891 | <i>Avpr1b</i>       | Vasopressin V1b receptor          |
| ENSRNOG00000006957 | <i>Gria4</i>        | Glutamate receptor 4              |
| ENSRNOG00000006957 | <i>Gria4</i>        | Glutamate receptor 4              |
| ENSRNOG00000006957 | <i>Gria4</i>        | Glutamate receptor 4              |
| ENSRNOG00000007108 | <i>Bmp7</i>         | bone morphogenetic protein 7      |
| ENSRNOG00000007185 | <i>D3ZCP4_RAT</i>   | leiomodrin-1                      |
| ENSRNOG00000007575 | <i>Lppr1</i>        | Lipid phosphate phosphatase-rela  |
| ENSRNOG00000007843 | <i>Wnt2</i>         | Protein Wnt                       |
| ENSRNOG00000008065 | <i>Wwc1</i>         | Uncharacterized protein           |
| ENSRNOG00000008570 | <i>Cadps</i>        | Calcium-dependent secretion acti  |
| ENSRNOG00000008570 | <i>Cadps</i>        | Calcium-dependent secretion acti  |
| ENSRNOG00000008570 | <i>Cadps</i>        | Calcium-dependent secretion acti  |
| ENSRNOG00000008570 | <i>Cadps</i>        | Calcium-dependent secretion acti  |
| ENSRNOG00000008761 | <i>Freq</i>         | Neuronal calcium sensor 1         |
| ENSRNOG00000008766 | <i>Grin2b</i>       | Glutamate                         |
| ENSRNOG00000009771 | <i>Cdh10</i>        | cadherin-10                       |
| ENSRNOG00000011184 | <i>Slc13a4</i>      | solute carrier family 13 member 4 |
| ENSRNOG00000011184 | <i>Slc13a4</i>      | solute carrier family 13 member 4 |
| ENSRNOG00000011203 | <i>Farp1</i>        | FERM                              |
| ENSRNOG00000011203 | <i>Farp1</i>        | FERM                              |
| ENSRNOG00000011475 | <i>Snip</i>         | SRC kinase signaling inhibitor 1  |
| ENSRNOG00000011475 | <i>Snip</i>         | SRC kinase signaling inhibitor 1  |
| ENSRNOG00000011475 | <i>Snip</i>         | SRC kinase signaling inhibitor 1  |



|                    |                   |                                   |
|--------------------|-------------------|-----------------------------------|
| ENSRNOG00000011475 | <i>Snip</i>       | SRC kinase signaling inhibitor 1  |
| ENSRNOG00000012189 | <i>Lect2</i>      | leukocyte cell-derived chemotaxi  |
| ENSRNOG00000012189 | <i>Lect2</i>      | leukocyte cell-derived chemotaxi  |
| ENSRNOG00000012342 | <i>Ttc29</i>      | Tetratricopeptide repeat protein  |
| ENSRNOG00000012817 | <i>Lrrc17</i>     | leucine rich repeat containing 17 |
| ENSRNOG00000012817 | <i>Lrrc17</i>     | leucine rich repeat containing 17 |
| ENSRNOG00000012906 | <i>Bcas1</i>      | Breast carcinoma-amplified sequ   |
| ENSRNOG00000012906 | <i>Bcas1</i>      | Breast carcinoma-amplified sequ   |
| ENSRNOG00000012906 | <i>Bcas1</i>      | Breast carcinoma-amplified sequ   |
| ENSRNOG00000012906 | <i>Bcas1</i>      | Breast carcinoma-amplified sequ   |
| ENSRNOG00000012906 | <i>Bcas1</i>      | Breast carcinoma-amplified sequ   |
| ENSRNOG00000013391 | <i>Sorbs2</i>     | Sorbin and SH3 domain-containin   |
| ENSRNOG00000013391 | <i>Sorbs2</i>     | Sorbin and SH3 domain-containin   |
| ENSRNOG00000013391 | <i>Sorbs2</i>     | Sorbin and SH3 domain-containin   |
| ENSRNOG00000013391 | <i>Sorbs2</i>     | Sorbin and SH3 domain-containin   |
| ENSRNOG00000013391 | <i>Sorbs2</i>     | Sorbin and SH3 domain-containin   |
| ENSRNOG00000013391 | <i>Sorbs2</i>     | Sorbin and SH3 domain-containin   |
| ENSRNOG00000013391 | <i>Sorbs2</i>     | Sorbin and SH3 domain-containin   |
| ENSRNOG00000014775 | <i>Nol4</i>       | nucleolar protein 4               |
| ENSRNOG00000015058 | <i>F1M245_RAT</i> | Uncharacterized protein           |
| ENSRNOG00000015058 | <i>F1M245_RAT</i> | Uncharacterized protein           |
| ENSRNOG00000015149 | <i>F1M0L6_RAT</i> | pro-neuregulin-4                  |
| ENSRNOG00000016043 | <i>Aqp4</i>       | Aquaporin-4                       |
| ENSRNOG00000016374 | <i>Fgfr2</i>      | fibroblast growth factor receptor |
| ENSRNOG00000016374 | <i>Fgfr2</i>      | fibroblast growth factor receptor |
| ENSRNOG00000016374 | <i>Fgfr2</i>      | fibroblast growth factor receptor |
| ENSRNOG00000016374 | <i>Fgfr2</i>      | fibroblast growth factor receptor |
| ENSRNOG00000016374 | <i>Fgfr2</i>      | fibroblast growth factor receptor |
| ENSRNOG00000016374 | <i>Fgfr2</i>      | fibroblast growth factor receptor |
| ENSRNOG00000016472 | <i>42067</i>      | Uncharacterized protein           |
| ENSRNOG00000016483 | <i>Myo16</i>      | Myosin-XVI                        |
| ENSRNOG00000016483 | <i>Myo16</i>      | Myosin-XVI                        |
| ENSRNOG00000016483 | <i>Myo16</i>      | Myosin-XVI                        |
| ENSRNOG00000016712 | <i>Lhcgr</i>      | Lutropin-choriogonadotropic hori  |
| ENSRNOG00000016712 | <i>Lhcgr</i>      | Lutropin-choriogonadotropic hori  |
| ENSRNOG00000016712 | <i>Lhcgr</i>      | Lutropin-choriogonadotropic hori  |
| ENSRNOG00000016712 | <i>Lhcgr</i>      | Lutropin-choriogonadotropic hori  |
| ENSRNOG00000016712 | <i>Lhcgr</i>      | Lutropin-choriogonadotropic hori  |

|                    |                   |                                    |
|--------------------|-------------------|------------------------------------|
| ENSRNOG00000016712 | <i>Lhcgr</i>      | Lutropin-choriogonadotropic hori   |
| ENSRNOG00000016712 | <i>Lhcgr</i>      | Lutropin-choriogonadotropic hori   |
| ENSRNOG00000016712 | <i>Lhcgr</i>      | Lutropin-choriogonadotropic hori   |
| ENSRNOG00000016712 | <i>Lhcgr</i>      | Lutropin-choriogonadotropic hori   |
| ENSRNOG00000016712 | <i>Lhcgr</i>      | Lutropin-choriogonadotropic hori   |
| ENSRNOG00000016783 | <i>Fshr</i>       | Follicle-stimulating hormone rece  |
| ENSRNOG00000016783 | <i>Fshr</i>       | Follicle-stimulating hormone rece  |
| ENSRNOG00000016887 | <i>Hrh4</i>       | Histamine H4 receptor              |
| ENSRNOG00000017712 | <i>Cartpt</i>     | Cocaine- and amphetamine-regul     |
| ENSRNOG00000017712 | <i>Cartpt</i>     | Cocaine- and amphetamine-regul     |
| ENSRNOG00000018602 | <i>F1M4M6_RAT</i> | calmodulin binding transcription ; |
| ENSRNOG00000018602 | <i>F1M4M6_RAT</i> | calmodulin binding transcription ; |
| ENSRNOG00000018602 | <i>F1M4M6_RAT</i> | calmodulin binding transcription ; |
| ENSRNOG00000018607 | <i>Slc12a3</i>    | Solute carrier family 12 member ;  |
| ENSRNOG00000018739 | <i>Pax7</i>       | paired box protein Pax-7           |
| ENSRNOG00000019613 | <i>Syt9</i>       | Synaptotagmin-9                    |
| ENSRNOG00000020138 | <i>Slc4a3</i>     | Anion exchange protein 3           |
| ENSRNOG00000020138 | <i>Slc4a3</i>     | Anion exchange protein 3           |
| ENSRNOG00000020138 | <i>Slc4a3</i>     | Anion exchange protein 3           |
| ENSRNOG00000020532 | <i>Kcnq1</i>      | Potassium voltage-gated channel    |
| ENSRNOG00000020532 | <i>Kcnq1</i>      | Potassium voltage-gated channel    |
| ENSRNOG00000021169 | <i>RGD1562196</i> | --                                 |
| ENSRNOG00000021566 | <i>F1M3H5_RAT</i> | Uncharacterized protein            |
| ENSRNOG00000021984 | <i>Rgs7</i>       | Regulator of G-protein signaling 7 |
| ENSRNOG00000021984 | <i>Rgs7</i>       | Regulator of G-protein signaling 7 |
| ENSRNOG00000022297 | <i>Kcnmb4</i>     | Calcium-activated potassium char   |
| ENSRNOG00000022420 | <i>F1M7E6_RAT</i> | Uncharacterized protein            |
| ENSRNOG00000024127 | <i>Atp13a5</i>    | probable cation-transporting ATP   |
| ENSRNOG00000024657 | <i>Mfsd4</i>      | major facilitator superfamily dom  |
| ENSRNOG00000024657 | <i>Mfsd4</i>      | major facilitator superfamily dom  |
| ENSRNOG00000024657 | <i>Mfsd4</i>      | major facilitator superfamily dom  |
| ENSRNOG00000024657 | <i>Mfsd4</i>      | major facilitator superfamily dom  |
| ENSRNOG00000024657 | <i>Mfsd4</i>      | major facilitator superfamily dom  |
| ENSRNOG00000024657 | <i>Mfsd4</i>      | major facilitator superfamily dom  |
| ENSRNOG00000024657 | <i>Mfsd4</i>      | major facilitator superfamily dom  |
| ENSRNOG00000024657 | <i>Mfsd4</i>      | major facilitator superfamily dom  |
| ENSRNOG00000024880 | <i>D3ZKH1_RAT</i> | Uncharacterized protein            |
| ENSRNOG00000025365 | <i>LOC684861</i>  | Uncharacterized protein            |
| ENSRNOG00000025365 | <i>LOC684861</i>  | Uncharacterized protein            |

|                    |                   |                                    |
|--------------------|-------------------|------------------------------------|
| ENSRNOG00000025480 | <i>LOC684368</i>  | Uncharacterized protein            |
| ENSRNOG00000025776 | <i>Ccdc148</i>    | coiled-coil domain-containing pro  |
| ENSRNOG00000025889 | <i>GNAS3_RAT</i>  | Neuroendocrine secretory protei    |
| ENSRNOG00000025889 | <i>GNAS3_RAT</i>  | Neuroendocrine secretory protei    |
| ENSRNOG00000025889 | <i>GNAS3_RAT</i>  | Neuroendocrine secretory protei    |
| ENSRNOG00000025889 | <i>GNAS3_RAT</i>  | Neuroendocrine secretory protei    |
| ENSRNOG00000027954 | <i>Cdh15</i>      | cadherin-15                        |
| ENSRNOG00000028225 | <i>Tnni3k</i>     | Serine/threonine-protein kinase 1  |
| ENSRNOG00000028281 | --                | --                                 |
| ENSRNOG00000028630 | <i>F1LY04_RAT</i> | Uncharacterized protein            |
| ENSRNOG00000029933 | <i>F1M8Z1_RAT</i> | Uncharacterized protein            |
| ENSRNOG00000030060 | <i>F1LYB4_RAT</i> | Uncharacterized protein            |
| ENSRNOG00000030060 | <i>F1LYB4_RAT</i> | Uncharacterized protein            |
| ENSRNOG00000030098 | <i>D3ZVM4_RAT</i> | tripartite motif-containing protei |
| ENSRNOG00000030547 | <i>Dpp6</i>       | Dipeptidyl aminopeptidase-like pi  |
| ENSRNOG00000030547 | <i>Dpp6</i>       | Dipeptidyl aminopeptidase-like pi  |
| ENSRNOG00000031100 | <i>Klhl1</i>      | kelch-like protein 1               |
| ENSRNOG00000031100 | <i>Klhl1</i>      | kelch-like protein 1               |
| ENSRNOG00000031189 | <i>Ido1</i>       | Indoleamine 2                      |
| ENSRNOG00000031782 | <i>F1M6H4_RAT</i> | Uncharacterized protein            |
| ENSRNOG00000031782 | <i>F1M6H4_RAT</i> | Uncharacterized protein            |
| ENSRNOG00000031921 | <i>F1M2T6_RAT</i> | Uncharacterized protein            |
| ENSRNOG00000031922 | <i>F1LVN6_RAT</i> | Uncharacterized protein            |
| ENSRNOG00000031922 | <i>F1LVN6_RAT</i> | Uncharacterized protein            |
| ENSRNOG00000031922 | <i>F1LVN6_RAT</i> | Uncharacterized protein            |
| ENSRNOG00000031922 | <i>F1LVN6_RAT</i> | Uncharacterized protein            |
| ENSRNOG00000031922 | <i>F1LVN6_RAT</i> | Uncharacterized protein            |
| ENSRNOG00000031922 | <i>F1LVN6_RAT</i> | Uncharacterized protein            |
| ENSRNOG00000033026 | <i>Dclk3</i>      | serine/threonine-protein kinase [  |
| ENSRNOG00000033162 | <i>Chia</i>       | Acidic mammalian chitinase         |
| ENSRNOG00000033162 | <i>Chia</i>       | Acidic mammalian chitinase         |
| ENSRNOG00000033162 | <i>Chia</i>       | Acidic mammalian chitinase         |
| ENSRNOG00000033162 | <i>Chia</i>       | Acidic mammalian chitinase         |
| ENSRNOG00000033162 | <i>Chia</i>       | Acidic mammalian chitinase         |
| ENSRNOG00000033274 | <i>RGD1565415</i> | Uncharacterized protein            |
| ENSRNOG00000033892 | <i>F1LY54_RAT</i> | Uncharacterized protein            |
| ENSRNOG00000033892 | <i>F1LY54_RAT</i> | Uncharacterized protein            |
| ENSRNOG00000033892 | <i>F1LY54_RAT</i> | Uncharacterized protein            |
| ENSRNOG00000033892 | <i>F1LY54_RAT</i> | Uncharacterized protein            |

|                    |                     |                                    |
|--------------------|---------------------|------------------------------------|
| ENSRNOG00000033892 | <i>F1LY54_RAT</i>   | Uncharacterized protein            |
| ENSRNOG00000033892 | <i>F1LY54_RAT</i>   | Uncharacterized protein            |
| ENSRNOG00000034177 | <i>Efna5</i>        | Ephrin-A5                          |
| ENSRNOG00000034343 | <i>U6</i>           | U6 spliceosomal RNA                |
| ENSRNOG00000035313 | <i>U6</i>           | U6 spliceosomal RNA                |
| ENSRNOG00000035313 | <i>U6</i>           | U6 spliceosomal RNA                |
| ENSRNOG00000035313 | <i>U6</i>           | U6 spliceosomal RNA                |
| ENSRNOG00000036519 | --                  | --                                 |
| ENSRNOG00000036958 | <i>RGD1311728</i>   | Uncharacterized protein            |
| ENSRNOG00000037164 | <i>LOC100361340</i> | Uncharacterized protein            |
| ENSRNOG00000037202 | <i>F1LZP6_RAT</i>   | Uncharacterized protein            |
| ENSRNOG00000037315 | <i>RGD1559714</i>   | TRAF domain and POZ/BTB conta      |
| ENSRNOG00000037315 | <i>RGD1559714</i>   | TRAF domain and POZ/BTB conta      |
| ENSRNOG00000037315 | <i>RGD1559714</i>   | TRAF domain and POZ/BTB conta      |
| ENSRNOG00000037315 | <i>RGD1559714</i>   | TRAF domain and POZ/BTB conta      |
| ENSRNOG00000037367 | <i>F1LW06_RAT</i>   | Uncharacterized protein            |
| ENSRNOG00000037367 | <i>F1LW06_RAT</i>   | Uncharacterized protein            |
| ENSRNOG00000037367 | <i>F1LW06_RAT</i>   | Uncharacterized protein            |
| ENSRNOG00000038328 | <i>Gjc2</i>         | gap junction protein               |
| ENSRNOG00000038328 | <i>Gjc2</i>         | gap junction protein               |
| ENSRNOG00000038721 | <i>D3ZJN6_RAT</i>   | Uncharacterized protein            |
| ENSRNOG00000039152 | <i>Frem3</i>        | FRAS1-related extracellular matri: |
| ENSRNOG00000039526 | <i>F1LZ12_RAT</i>   | Uncharacterized protein            |
| ENSRNOG00000039629 | <i>F1M9D7_RAT</i>   | Uncharacterized protein            |
| ENSRNOG00000039855 | <i>F1M6C9_RAT</i>   | Uncharacterized protein            |
| ENSRNOG00000040188 | <i>Lcn3</i>         | Uncharacterized protein            |
| ENSRNOG00000040337 | <i>D3ZKK1_RAT</i>   | Uncharacterized protein            |
| ENSRNOG00000040915 | <i>SNORD24</i>      | Small nucleolar RNA SNORD24        |
| ENSRNOG00000041471 | --                  | --                                 |
| ENSRNOG00000041556 | <i>5_8S_rRNA</i>    | 5.8S ribosomal RNA                 |
| ENSRNOG00000041610 | --                  | --                                 |
| ENSRNOG00000042221 | <i>E9PSJ9_RAT</i>   | RAF domain and POZ/BTB contain     |
| ENSRNOG00000042221 | <i>E9PSJ9_RAT</i>   | RAF domain and POZ/BTB contain     |
| ENSRNOG00000042745 | <i>LOC682835</i>    | Uncharacterized protein            |
| ENSRNOG00000042745 | <i>LOC682835</i>    | Uncharacterized protein            |
| ENSRNOG00000042745 | <i>LOC682835</i>    | Uncharacterized protein            |
| ENSRNOG00000042884 | <i>D3ZCU5_RAT</i>   | Uncharacterized protein            |
| ENSRNOG00000043035 | <i>Fbxl13</i>       | F-box and leucine-rich repeat pro  |

|                    |                   |                                   |
|--------------------|-------------------|-----------------------------------|
| ENSRNOG00000043035 | <i>Fbxl13</i>     | F-box and leucine-rich repeat pro |
| ENSRNOG00000043173 | <i>F1LVU1_RAT</i> | Uncharacterized protein           |
| ENSRNOG00000044911 | <i>7SK</i>        | 7SK RNA                           |
| ENSRNOG00000045135 | <i>U6</i>         | U6 spliceosomal RNA               |

































---

ne protein 3

ent protein 3

taining family H member 2

cid transporter 1

cid transporter 1

cotransporter 4  
cotransporter 4

characterized protein  
characterized protein

l-CoA dehydrogenase

pressor 2

member 1  
member 1

ie methyltransferase  
ie methyltransferase

ne protein 3  
RGD1566169\_predictedUncharacterized protein

ent protein 3

ne protein 3

ed protein  
atase-interacting protein 1

omains protein 3

type II-alpha regulatory subunit

ssed protein  
ssed protein

ember 3

e 4



e 4

|

|

|

itein CASK

itein CASK

itein CASK

itein CASK

itein CASK

itein CASK

:ein 1

:ein 1

:ein 1

rit beta

og

ing protein 2

er 14

rotein 2

ubunit A-like 1

protein 2  
se-2  
se-2  
se-2

ng protein 27  
ng protein 27  
51  
rotein 4  
peptide 58  
peptide 58  
peptide 58  
peptide 58

osphatase O  
osphatase O  
nase  
nase  
rotein 8E  
FAO3

RGD1566226\_predictedUncharacterized protein  
e CWC27 homolog  
ulatory subunit beta  
ulatory subunit beta  
ulatory subunit beta  
x subunit 1B  
itase 1  
2

ubunit

dase 3

dase 3

dase 3

rotein kinase kinase 2

omain-containing protein 3

e

: 1

: 1

: 1

: 1

5

5

5

13 (RGD1312026)

ated potassium channel protein 3

on factor ATF-6 alpha

2

2

atase 6 catalytic subunit

form 1

form 1

form 1

pendent dioxygenase ABH6

pendent dioxygenase ABH6

ase AER61

rotein 8C

ein RTF1 homolog

ein RTF1 homolog

ein RTF1 homolog

enzyme 2 (Uba2)

enzyme 2 (Uba2)

.9 (Predicted)Uncharacterized protein

1e-rich protein 2

1e-rich protein 2

02 (RGD1306839)

mily member 6

mily member 6

mily member 6

mannosidase-like 2

C2

C2

C2

C2

C2

C2

stein 1

stein 1 homolog

se 1

se 1

se 1

homolog

homolog

homolog

homolog

.

.

in

ase RNF217

')

')

tor DBS

tor DBS

tor DBS

tor DBS

γ-receptor type 12

γ-receptor type 12

nscription factor

nscription factor

kinase

kinase

kinase

kinase

family B member 1B allele A

racting protein 4

ctor 146

rotein 2

rotein 2

rotein 2



ε factor  
ε factor  
omolog

RGD1562310\_predictedUncharacterized protein  
e

subunit RPB9

11

11

11

11

ima Fc region receptor III

repeats protein

repeats protein

repeats protein

1

1

cription factor

cription factor

cription factor

cription factor

cription factor

rotein

rotein  
rotein  
se 3

B  
B  
taining protein  
taining protein

actor 2-alpha kinase 4  
actor 2-alpha kinase 4

lehydrogenase  
lehydrogenase

)  
)  
)  
)  
)  
)  
)  
)  
)  
)

)

)

)

kinase kinase 1

kinase kinase 1

34

on stimulator

on stimulator

osphatase mu

osphatase mu

ium channel subunit alpha-1A

ium channel subunit alpha-1A

ium channel subunit alpha-1A

ium channel subunit alpha-1A

nger 2

nger 2

tein 146

or receptor 1

protein kinase kinase 7

protein kinase kinase 7

ein 16

ein 16

ein 16

ein 16

ase  
it 3

n stimulator-like 1  
n stimulator-like 1  
IO3

subunit gamma-2  
subunit gamma-2

;

;

;

1

1

1

1

or

or

or

or

or

or

or

se 1

WNK1

WNK1

WNK1

anscription subunit 27

{ 3

{ 3

{ 3

{ 3

f transcription 4

f transcription 4

otransferase

otransferase

otransferase

otransferase

eta

eta

eta

rotein 104

rotein 104

rotein 104

rotein 104

rotein 104

rotein 104

nine-protein kinase 4

er potassium channel 2

er potassium channel 2

log

log

log

rel gamma-2 subunit

ated protein type 1

ivator 1

ivator 1

ivator 1

ivator 1

4

4

n 2

n 2

29

ence 1 homolog

ig protein 2

2 isoform a

mone receptor

mone receptor

mone receptor

mone receptor

mone receptor





rotein 148

n 55LHAL tetrapeptideGPIPIRRH peptide

n 55LHAL tetrapeptideGPIPIRRH peptide

n 55LHAL tetrapeptideGPIPIRRH peptide

n 55LHAL tetrapeptideGPIPIRRH peptide

FNNI3K

n 71

rotein 6

rotein 6

DCLK3

ining protein T1  
ining protein T1  
ining protein T1  
ining protein T1

x protein 3

ing protein T2  
ing protein T2

tein 13

tein 13

































---
