# Supplementary material for: A Bayesian Approach for Analysis of Whole-Genome Bisulfite Sequencing Data Identifies Disease-Associated Changes in DNA Methylation
Source: PubMed Central journal article supplement (PMC5378105; doi:10.1534/genetics.116.195008), 2017-02-16
Supplement: 1443TableS4.pdf [file 1443TableS4.pdf]

**Supplementary Table 4.** List of DSS called deifferentially methylated regions (DMRs; 500b

| <b>DSS Called Differentially Methylated Regions</b> |                     |                   |               |                                |
|-----------------------------------------------------|---------------------|-------------------|---------------|--------------------------------|
| Chr.                                                | Start Position (bp) | End Position (bp) | Number of CpG | Delta in Methylation (LEW-WKY) |
| 18                                                  | 74384212            | 74384517          | 9             | 0.55                           |
| 12                                                  | 45388863            | 45389260          | 8             | -0.57                          |
| 11                                                  | 30968707            | 30968950          | 6             | 0.65                           |
| 1                                                   | 201199584           | 201200184         | 18            | -0.53                          |
| 17                                                  | 3958378             | 3958755           | 13            | 0.51                           |
| 12                                                  | 9683275             | 9683841           | 14            | -0.62                          |
| 20                                                  | 6208143             | 6208388           | 6             | 0.70                           |
| 12                                                  | 45388863            | 45389260          | 8             | -0.57                          |
| 12                                                  | 9976121             | 9976446           | 10            | 0.53                           |
| 11                                                  | 45442813            | 45443476          | 6             | -0.20                          |
| 11                                                  | 30968707            | 30968950          | 6             | 0.65                           |
| 10                                                  | 3768643             | 3769261           | 12            | 0.62                           |
| 14                                                  | 11926941            | 11927809          | 20            | 0.66                           |
| 10                                                  | 72117718            | 72117864          | 7             | -0.57                          |
| 13                                                  | 43003365            | 43003604          | 7             | 0.81                           |
| 7                                                   | 24229425            | 24229683          | 10            | 0.50                           |
| 14                                                  | 77663267            | 77663426          | 6             | -0.49                          |
| 6                                                   | 8144581             | 8144681           | 6             | -0.50                          |
| 5                                                   | 48703345            | 48703503          | 6             | -0.54                          |
| 5                                                   | 39763534            | 39763732          | 11            | -0.50                          |
| 10                                                  | 72117718            | 72117864          | 7             | -0.57                          |
| 3                                                   | 44701381            | 44702170          | 24            | -0.68                          |
| 8                                                   | 31961263            | 31961315          | 9             | 0.57                           |
| 8                                                   | 54381850            | 54382069          | 11            | 0.76                           |
| 8                                                   | 63650013            | 63650447          | 9             | -0.60                          |
| 2                                                   | 41515365            | 41515517          | 6             | -0.47                          |
| 8                                                   | 47600316            | 47600708          | 7             | 0.66                           |
| 16                                                  | 79777986            | 79778329          | 11            | 0.62                           |
| 3                                                   | 59730733            | 59731057          | 8             | 0.63                           |
| 9                                                   | 14266318            | 14266855          | 18            | 0.56                           |
| 19                                                  | 48907678            | 48908091          | 16            | 0.69                           |
| 16                                                  | 70554885            | 70555098          | 6             | -0.54                          |
| 1                                                   | 196783603           | 196784043         | 11            | 0.60                           |
| 18                                                  | 1054187             | 1054560           | 28            | -0.46                          |
| 18                                                  | 1054187             | 1054560           | 28            | -0.46                          |
| 1                                                   | 43174814            | 43175047          | 7             | 0.59                           |
| 1                                                   | 240595618           | 240595841         | 7             | 0.64                           |
| 1                                                   | 240595618           | 240595841         | 7             | 0.64                           |
| 1                                                   | 203418848           | 203418948         | 11            | 0.54                           |
| 1                                                   | 190990317           | 190990437         | 7             | -0.58                          |

|    |           |           |    |       |
|----|-----------|-----------|----|-------|
| 16 | 58275643  | 58275834  | 6  | -0.72 |
| 18 | 50390326  | 50390721  | 9  | 0.72  |
| 5  | 91565229  | 91565445  | 21 | 0.58  |
| 14 | 47278577  | 47278995  | 7  | 0.77  |
| 14 | 47282756  | 47283168  | 9  | 0.55  |
| 16 | 79777986  | 79778329  | 11 | 0.62  |
| 4  | 15764023  | 15764386  | 12 | 0.53  |
| 12 | 9683275   | 9683841   | 14 | -0.62 |
| 13 | 23252336  | 23252549  | 8  | 0.55  |
| 20 | 12785392  | 12785843  | 20 | -0.49 |
| 1  | 201199584 | 201200184 | 18 | -0.53 |
| 12 | 1577590   | 1578072   | 19 | 0.75  |
| 17 | 3958378   | 3958755   | 13 | 0.51  |
| 1  | 201199584 | 201200184 | 18 | -0.53 |

p window) that overlap with genes (n=45). The overlapping DMRs are those located with

| Length (bp) | Feature    | Chr. | Start (bp) | End (bp)  | Strand |
|-------------|------------|------|------------|-----------|--------|
| 306         | downstream | 18   | 74383471   | 74384471  | +      |
| 397         | exon       | 12   | 45388794   | 45388878  | -      |
| 243         | exon       | 11   | 30968926   | 30968988  | -      |
| 600         | exon       | 1    | 201199467  | 201199807 | -      |
| 377         | exon       | 17   | 3956809    | 3958985   | +      |
| 566         | exon       | 12   | 9683833    | 9683960   | -      |
| 245         | intron     | 20   | 6205766    | 6210798   | +      |
| 397         | intron     | 12   | 45387834   | 45391191  | -      |
| 325         | intron     | 12   | 9950380    | 10016402  | +      |
| 663         | intron     | 11   | 45440895   | 45472119  | -      |
| 243         | intron     | 11   | 30968210   | 30968926  | -      |
| 618         | intron     | 10   | 3765810    | 3787798   | -      |
| 868         | intron     | 14   | 11919526   | 11929689  | +      |
| 146         | intron     | 10   | 72115308   | 72117885  | +      |
| 239         | intron     | 13   | 42899039   | 43027499  | +      |
| 258         | intron     | 7    | 24225865   | 24230728  | +      |
| 159         | intron     | 14   | 77659217   | 77700245  | +      |
| 100         | intron     | 6    | 8142095    | 8144745   | -      |
| 158         | intron     | 5    | 48611899   | 48715885  | +      |
| 198         | intron     | 5    | 39747700   | 39789542  | -      |
| 146         | intron     | 10   | 72111149   | 72124567  | -      |
| 789         | intron     | 3    | 44693927   | 44721452  | -      |
| 52          | intron     | 8    | 31960461   | 31978095  | +      |
| 219         | intron     | 8    | 54381678   | 54382426  | -      |
| 434         | intron     | 8    | 63649705   | 63653719  | +      |
| 152         | intron     | 2    | 41478488   | 41571720  | -      |
| 392         | intron     | 8    | 47598339   | 47602062  | +      |
| 343         | intron     | 16   | 79744155   | 79910164  | -      |
| 324         | intron     | 3    | 59727962   | 59731721  | -      |
| 537         | intron     | 9    | 14222049   | 14362740  | -      |
| 413         | intron     | 19   | 48730700   | 48917387  | +      |
| 213         | intron     | 16   | 70554046   | 70556232  | -      |
| 440         | intron     | 1    | 196693498  | 196826546 | +      |
| 373         | intron     | 18   | 1009185    | 1152690   | +      |
| 373         | intron     | 18   | 1009185    | 1152690   | +      |
| 233         | intron     | 1    | 43167138   | 43274818  | -      |
| 223         | intron     | 1    | 240564622  | 240631888 | +      |
| 223         | intron     | 1    | 240564622  | 240631888 | +      |
| 100         | intron     | 1    | 203383721  | 203459580 | +      |
| 120         | intron     | 1    | 190987715  | 191006715 | +      |

|     |          |    |           |           |   |
|-----|----------|----|-----------|-----------|---|
| 191 | intron   | 16 | 58214917  | 58297046  | + |
| 395 | intron   | 18 | 50365721  | 50406058  | - |
| 216 | intron   | 5  | 91550057  | 91566087  | + |
| 418 | intron   | 14 | 47266630  | 47293334  | - |
| 412 | intron   | 14 | 47266630  | 47293334  | - |
| 343 | intron   | 16 | 79742690  | 79841040  | + |
| 363 | intron   | 4  | 15733080  | 15831387  | - |
| 566 | intron   | 12 | 9674655   | 9686037   | - |
| 213 | intron   | 13 | 23096577  | 23258406  | + |
| 451 | intron   | 20 | 12784454  | 12786253  | + |
| 601 | upstream | 1  | 201199807 | 201200807 | - |
| 483 | upstream | 12 | 1577242   | 1578242   | + |
| 377 | utr3     | 17 | 3957001   | 3958985   | + |
| 600 | utr5     | 1  | 201199716 | 201199807 | - |

in  $\pm$  1kb from the gene boundaries.

### Overlapping Genomic Feature

| Overlap with<br>DMR (bp) | Overlapping Gene ID | Gene Symbol       |
|--------------------------|---------------------|-------------------|
| 259                      | ENSRNOG000000042957 | <i>D3ZF23_RAT</i> |
| 15                       | ENSRNOG00000000665  | <i>Pitpnb</i>     |
| 24                       | ENSRNOG00000002051  | <i>Synj1</i>      |
| 223                      | ENSRNOG00000015078  | <i>Ifitm3</i>     |
| 377                      | ENSRNOG00000017613  | <i>Pols</i>       |
| 8                        | ENSRNOG00000043178  | <i>Znf655</i>     |
| 245                      | ENSRNOG00000000498  | <i>Anks1a</i>     |
| 397                      | ENSRNOG00000000665  | <i>Pitpnb</i>     |
| 325                      | ENSRNOG00000000999  | <i>Smurf1</i>     |
| 663                      | ENSRNOG00000001616  | <i>Senp7</i>      |
| 219                      | ENSRNOG00000002051  | <i>Synj1</i>      |
| 618                      | ENSRNOG00000002294  | <i>Snx29</i>      |
| 868                      | ENSRNOG00000002361  | <i>Prkg2</i>      |
| 146                      | ENSRNOG00000002598  | <i>F1LZCO_RAT</i> |
| 239                      | ENSRNOG00000003878  | <i>Thsd7b</i>     |
| 258                      | ENSRNOG00000004302  | <i>Pah</i>        |
| 159                      | ENSRNOG00000005302  | <i>Slc2a9</i>     |
| 100                      | ENSRNOG00000005877  | <i>LPPRC_RAT</i>  |
| 158                      | ENSRNOG00000006170  | <i>Bach2</i>      |
| 198                      | ENSRNOG00000007441  | <i>Klhl32</i>     |
| 146                      | ENSRNOG00000007523  | <i>Cct6b</i>      |
| 789                      | ENSRNOG00000007528  | <i>Kcnh7</i>      |
| 52                       | ENSRNOG00000008709  | <i>Rics</i>       |
| 219                      | ENSRNOG00000011228  | <i>Layn</i>       |
| 434                      | ENSRNOG00000011619  | <i>Myo9a</i>      |
| 152                      | ENSRNOG00000011623  | <i>Rab3c</i>      |
| 392                      | ENSRNOG00000012453  | <i>RGD1564560</i> |
| 343                      | ENSRNOG00000012573  | <i>Dlgap2</i>     |
| 324                      | ENSRNOG00000012580  | <i>LOC311134</i>  |
| 537                      | ENSRNOG00000012708  | <i>RGD1563020</i> |
| 413                      | ENSRNOG00000014371  | <i>Cdh13</i>      |
| 213                      | ENSRNOG00000014741  | <i>D4A6Z8_RAT</i> |
| 440                      | ENSRNOG00000016038  | <i>Mgmt</i>       |
| 373                      | ENSRNOG00000016366  | <i>Colec12</i>    |
| 373                      | ENSRNOG00000016366  | <i>Colec12</i>    |
| 233                      | ENSRNOG00000018013  | <i>PRKN2_RAT</i>  |
| 223                      | ENSRNOG00000018532  | <i>E9PTD5_RAT</i> |
| 223                      | ENSRNOG00000018532  | <i>E9PTD5_RAT</i> |
| 100                      | ENSRNOG00000020532  | <i>Kcnq1</i>      |
| 120                      | ENSRNOG00000020624  | <i>Acadslb</i>    |

191 ENSRNOG00000022374 *Sgcz*  
395 ENSRNOG00000023197 *Znf608*  
216 ENSRNOG00000024190 *LOC683719*  
418 ENSRNOG00000026241 *D3ZY83\_RAT*  
412 ENSRNOG00000026241 *D3ZY83\_RAT*  
343 ENSRNOG00000038026 *F1M6B7\_RAT*  
363 ENSRNOG00000040029 *F1M3I5\_RAT*  
566 ENSRNOG00000043178 *Znf655*  
213 ENSRNOG00000043185 *Cntnap5*  
451 ENSRNOG00000043212 *Dip2a*  
377 ENSRNOG00000015078 *Ifitm3*  
482 ENSRNOG00000028892 *D3ZUH5\_RAT*  
377 ENSRNOG00000017613 *Pols*  
91 ENSRNOG00000015078 *Ifitm3*

---

Gene Name

---

Uncharacterized protein  
Phosphatidylinositol transfer protein beta isoform  
Synaptojanin-1  
Interferon-induced transmembrane protein 3  
DNA polymerase sigma  
zinc finger protein 655  
ankyrin repeat and sterile alpha motif domain containing 1A  
Phosphatidylinositol transfer protein beta isoform  
similar to RIKEN cDNA 4930431E10 (RGD1309707), mRNA  
Sentrin-specific protease 7  
Synaptojanin-1  
sorting nexin-29  
cGMP-dependent protein kinase 2  
Uncharacterized protein  
thrombospondin type-1 domain-containing protein 7B  
Phenylalanine-4-hydroxylase  
solute carrier family 2, facilitated glucose transporter member 9  
Leucine-rich PPR motif-containing protein, mitochondrial  
transcription regulator protein BACH2  
Uncharacterized protein  
T-complex protein 1 subunit zeta-2  
Potassium voltage-gated channel subfamily H member 7  
Uncharacterized protein  
layilin  
Myosin-IXa  
Ras-related protein Rab-3C  
similar to RCK (RGD1564560), mRNA  
Disks large-associated protein 2  
Uncharacterized protein  
Uncharacterized protein  
cadherin-13  
Uncharacterized protein  
Methylated-DNA--protein-cysteine methyltransferase  
Collectin-12  
Collectin-12  
E3 ubiquitin-protein ligase parkin  
polycomb group RING finger protein 5  
polycomb group RING finger protein 5  
Potassium voltage-gated channel subfamily KQT member 1  
Short/branched chain specific acyl-CoA dehydrogenase, mitochondrial

sarcoglycan zeta  
zinc finger protein 608  
Uncharacterized protein  
Uncharacterized protein  
Uncharacterized protein  
Uncharacterized protein  
Uncharacterized protein  
zinc finger protein 655  
Contactin-associated protein like 5-4  
disco-interacting protein 2 homolog A  
Interferon-induced transmembrane protein 3  
Uncharacterized protein  
DNA polymerase sigma  
Interferon-induced transmembrane protein 3
