# Supplementary material for: A Bayesian Approach for Analysis of Whole-Genome Bisulfite Sequencing Data Identifies Disease-Associated Changes in DNA Methylation
Source: PubMed Central journal article supplement (PMC5378105; doi:10.1534/genetics.116.195008), 2017-02-16
Supplement: 1443TableS5.pdf [file 1443TableS5.pdf]

## Gene Name

---

*Abca1*  
*Acadsb*  
*Amotl1*  
*Btd*  
*Cd300lg*  
*Cped1*  
*Cpne5*  
*Ctse*  
*Cyb561a3*  
*D3ZGN7\_RAT*  
*Dntt*  
*Ephb2*  
*Fgf12*  
*Folr1*  
*Gcom1*  
*Ifitm3*  
*Kansl1l*  
*Kif7*  
*Lzts2*  
*Maff*  
*Man1c1*  
*Mcoln2*  
*Mcoln3*  
*Mgmt*  
*Mmp11*  
*Myo1d*  
*Myo5b*  
*Pithd1*  
*Plekhh2*  
*RGD1309870*  
*Rhbdl3*  
*Rin2*  
*Rnaset2*  
*Rnpep*  
*Scd1*  
*Sept1*  
*She*  
*Slc38a1*  
*Slc4a5*  
*Smtn*

*Ston2*

*Svep1*

*Thrb*

*Tmem82*

*Trem1*

*U1*

*Ydjc*

## Gene Description

---

ATP-binding cassette, subfamily A (ABC1), member 1  
acyl-CoA dehydrogenase, short/branched chain  
angiomin-like 1  
biotinidase  
Cd300 molecule-like family member G  
cadherin-like and PC-esterase domain containing 1  
copine V  
cathepsin E  
cytochrome b561 family, member A3  
Uncharacterized protein  
DNA nucleotidylexotransferase  
Eph receptor B2  
fibroblast growth factor 12  
folate receptor 1 (adult)  
GRINL1A complex locus protein 1  
interferon induced transmembrane protein 3  
KAT8 regulatory NSL complex subunit 1-like  
kinesin family member 7  
leucine zipper, putative tumor suppressor 2  
v-maf avian musculoaponeurotic fibrosarcoma oncogene homolog F  
mannosidase, alpha, class 1C, member 1  
mucolipin 2  
mucolipin 3  
O-6-methylguanine-DNA methyltransferase  
matrix metalloproteinase 11  
myosin ID  
myosin Vb  
PITH (C-terminal proteasome-interacting domain of thioredoxin-like) domain containing 1  
pleckstrin homology domain containing, family H (with MyTH4 domain) member 2  
hypothetical LOC289778  
rhomboid, veinlet-like 3 (Drosophila)  
Ras and Rab interactor 2  
ribonuclease T2  
arginyl aminopeptidase (aminopeptidase B)  
stearoyl-Coenzyme A desaturase 1  
septin 1  
Src homology 2 domain containing E  
solute carrier family 38, member 1  
solute carrier family 4, sodium bicarbonate cotransporter, member 5  
smoothelin

stonin 2

sushi, von Willebrand factor type A, EGF and pentraxin domain containing 1

thyroid hormone receptor beta

transmembrane protein 82

triggering receptor expressed on myeloid cells-like 1

U1 spliceosomal RNA

YdjC homolog (bacterial)

/KY and LEW rat strains that are also di

| <b>Ensembl Gene ID</b> | <b>CHR</b> |
|------------------------|------------|
| ENSRNOG00000018126     | chr5       |
| ENSRNOG00000020624     | chr1       |
| ENSRNOG00000008990     | chr8       |
| ENSRNOG00000019656     | chr16      |
| ENSRNOG00000020837     | chr10      |
| ENSRNOG00000021840     | chr4       |
| ENSRNOG00000000522     | chr20      |
| ENSRNOG00000006963     | chr13      |
| ENSRNOG00000020702     | chr1       |
| ENSRNOG00000027841     | chr4       |
| ENSRNOG00000013615     | chr1       |
| ENSRNOG00000012531     | chr5       |
| ENSRNOG00000001931     | chr11      |
| ENSRNOG00000019902     | chr1       |
| ENSRNOG00000017202     | chr8       |
| ENSRNOG00000015078     | chr1       |
| ENSRNOG00000028149     | chr9       |
| ENSRNOG00000026857     | chr1       |
| ENSRNOG00000014969     | chr1       |
| ENSRNOG00000012886     | chr7       |
| ENSRNOG00000017087     | chr5       |
| ENSRNOG00000015089     | chr2       |
| ENSRNOG00000015024     | chr2       |
| ENSRNOG00000016038     | chr1       |
| ENSRNOG00000028344     | chr20      |
| ENSRNOG00000003276     | chr10      |
| ENSRNOG00000014104     | chr18      |
| ENSRNOG00000010873     | chr5       |
| ENSRNOG00000005124     | chr6       |
| ENSRNOG000000037621    | chr14      |
| ENSRNOG00000005515     | chr10      |
| ENSRNOG00000010131     | chr3       |
| ENSRNOG00000013190     | chr1       |
| ENSRNOG00000006720     | chr13      |
| ENSRNOG00000013552     | chr1       |
| ENSRNOG00000017804     | chr1       |
| ENSRNOG00000020797     | chr2       |
| ENSRNOG00000005291     | chr7       |
| ENSRNOG00000010378     | chr4       |
| ENSRNOG00000019451     | chr14      |

|                     |       |
|---------------------|-------|
| ENSRNOG00000004458  | chr6  |
| ENSRNOG000000033110 | chr5  |
| ENSRNOG000000006649 | chr15 |
| ENSRNOG000000011970 | chr5  |
| ENSRNOG000000040109 | chr9  |
| ENSRNOG000000035334 | chr2  |
| ENSRNOG00000001861  | chr11 |

fferentially expressed between the two strains in the same tissue.

### DMR Gene overlap

---

70555077-70555215  
190990317-190990437  
11391719-11392350  
7121594-7121762  
91104033-91104084/91104084-91104178/91103844-91104033/91104033-91104041  
48334740-48334986  
7471342-7471507/7471342-7471507  
44601546-44601743  
213078596-213079072/213078596-213079072  
157369967-157369979  
246217613-246217908  
155446650-155447336/155447682-155447726/155578344-155578692  
74423528-74423536  
159315263-159315432/159315263-159315300  
75999078-75999242  
201199522-201199807/201199807-201200184/201199716-201199807  
65578002-65578018/65578002-65578018  
135484912-135485255  
250085410-250085533  
117335736-117336128  
153336351-153336935/153345531-153346146  
244382399-244382456/244382223-244382399  
244285393-244285537/244286406-244286792  
196783603-196784043  
13130833-13131181  
68789450-68789566/68789190-68789566  
71444981-71445138  
154761710-154762122  
7949640-7949973  
92374023-92374031  
68549388-68549672  
134342611-134342621/134416266-134416684  
47244465-47244525  
48283546-48283871  
249471145-249471156/249470979-249471145  
186478917-186479089  
182060749-182061173  
135296975-135297088  
117447942-117448201  
84172871-84173275/84173275-84173369/84173369-84173390

115280790-115281128

76087419-76087478/76088075-76088118/76087478-76088075/76203959-76203980

9324042-9324638

160519056-160519285

8052189-8052235/8052044-8052189

244285393-244285537

85848019-85848083/85847836-85848019/85847836-85848164/85848019-85848083



| Average methylation difference | Gene feature                | log <sub>2</sub> fold change<br>(diff. expression) |
|--------------------------------|-----------------------------|----------------------------------------------------|
| -0.55                          | intron                      | 0.77                                               |
| -0.65                          | intron                      | 1.13                                               |
| -0.40                          | intron                      | -2.56                                              |
| -0.49                          | intron                      | 0.81                                               |
| -0.43/-0.43/-0.43/-0.43        | exon/intron/upstream/5' UTR | 3.42                                               |
| 0.38                           | intron                      | -2.27                                              |
| -0.41/-0.41                    | downstream/intron           | -1.95                                              |
| -0.34                          | intron                      | -1.05                                              |
| -0.37/-0.37                    | exon/3' UTR                 | -1.03                                              |
| 0.38                           | intron                      | -1.23                                              |
| -0.42                          | intron                      | 4.31                                               |
| 0.35/0.36/0.40                 | intron/intron/intron        | -5.29                                              |
| 0.35                           | intron                      | 3.21                                               |
| -0.40/-0.40                    | exon/3' UTR                 | -1.58                                              |
| 0.48                           | intron                      | -2.78                                              |
| -0.39/-0.39/-0.39              | exon/upstream/5' UTR        | 3.62                                               |
| 0.38/0.38                      | end/intron                  | 1.30                                               |
| -0.35                          | exon                        | 1.37                                               |
| 0.35                           | intron                      | -0.97                                              |
| 0.35                           | intron                      | -2.66                                              |
| -0.43/-0.46                    | intron/intron               | 1.04                                               |
| -0.49/-0.489                   | exon/intron                 | -1.22                                              |
| -0.35/0.40                     | intron/intron               | -2.63                                              |
| 0.38                           | intron                      | 1.06                                               |
| -0.34                          | intron                      | -1.81                                              |
| 0.39/0.39                      | downstream/intron           | -2.94                                              |
| -0.44                          | intron                      | -3.46                                              |
| 0.36                           | intron                      | 0.82                                               |
| 0.43                           | intron                      | -5.27                                              |
| 0.37                           | intron                      | -4.04                                              |
| -0.38                          | intron                      | 6.22                                               |
| 0.43/0.40                      | intron/intron               | 0.96                                               |
| 0.40                           | exon                        | 0.80                                               |
| 0.44                           | intron                      | -0.86                                              |
| 0.36/0.36                      | exon/intron                 | -1.68                                              |
| -0.34                          | up                          | -2.01                                              |
| -0.41                          | intron                      | 2.18                                               |
| -0.42                          | intron                      | 1.75                                               |
| 0.43                           | intron                      | -1.37                                              |
| 0.49/0.49/0.49                 | exon/intron/exon            | -2.02                                              |

|                        |                             |       |
|------------------------|-----------------------------|-------|
| -0.38                  | intron                      | -1.62 |
| -0.45/-0.45/-0.45/0.34 | exon/exon/intron/upstream   | 1.37  |
| -0.39                  | intron                      | 1.20  |
| -0.40                  | up                          | -3.02 |
| -0.37/-0.37            | exon/intron                 | 1.90  |
| -0.35                  | up                          | -8.45 |
| 0.41/0.41/0.41/0.41    | exon/intron/upstream/5' UTR | -1.91 |

**adjusted p-value  
(diff. expression)**

---

0.014  
0.002  
0.001  
0.038  
0.011  
2.74E-04  
0.049  
0.005  
0.011  
0.029  
1.25E-15  
8.28E-05  
0.032  
0.002  
0.007  
1.71E-08  
0.008  
5.80E-06  
0.007  
5.90E-12  
0.006  
0.002  
2.42E-19  
0.034  
0.040  
6.45E-24  
5.37E-05  
0.030  
6.75E-09  
1.41E-05  
1.08E-40  
0.028  
0.029  
0.049  
0.027  
0.001  
0.012  
2.60E-08  
1.86E-04  
8.91E-06

0.012  
0.015  
0.032  
1.87E-04  
0.002  
0.008  
5.69E-09

---
